# Supplementary material for: Light-based tuning of ligand half-life supports kinetic proofreading model of T cell signaling
Source: eLife. 2019 Apr 5;8:e42498. doi: 10.7554/eLife.42498 (PMC6488292; doi:10.7554/eLife.42498)
Supplement: Figure 4—source data 1. — It includes measurements of receptor occupancy, ligand binding half-life and cell signaling (either DAG levels or ZAP70 recruitment). [file elife-42498-fig4-data1.xlsx]

## Sheet: DAG normalized to sat
	These are all the single cell DAG measurements comprising Figure 4–figure supplement 1, normalized to DAG saturation. "DAG data set 1" is used to create main text Figure 4.
	DAG data set 1				DAG data set 2				DAG data set 3
	LOV2 half-life (sec)	CAR occupancy	DAG level (normalized to saturation)		LOV2 half-life (sec)	CAR occupancy	DAG level (normalized to saturation)		LOV2 half-life (sec)	CAR occupancy	DAG level (normalized to saturation)
	1.0369	613.31	0.17614		1.0369	32.417	0.087908		1.0369	99.411	0.26208
	1.1152	1263.9	0.30122		1.1152	-751.15	-0.1072		1.1152	128.71	0.12728
	1.4002	1321.3	0.37509		1.4002	-192.02	0.46664		1.4002	256.73	0.12629
	1.8049	1410.1	0.058432		1.8049	70.557	-0.12661		1.8049	214.82	0.26498
	2.3786	1136.8	0.077838		2.3786	-0.0030619	-0.10538		2.3786	290.7	0.43846
	3.1224	1730.6	0.33452		3.1224	1293.6	0.31205		3.1224	327.81	0.47429
	4.3053	1735	0.41311		4.3053	133.91	1.4928		4.3053	395.15	0.77643
	5.7043	2271.7	0.49478		5.7043	921.85	2.0611		5.7043	747.8	0.64653
	7.3322	2860	0.65165		7.3322	1819.8	1.0851		7.3322	853.97	0.88998
	8.747	4182.5	1.0466		8.747	1743.5	2.1365		8.747	1094.5	1.1163
	9.74	4357.7	1		9.74	993.17	1		9.74	1123.4	1
	1.0369	-58.774	0.056161		1.0369	-95.865	-0.31561		1.0369	-28.841	0.18027
	1.1152	128.54	0.074181		1.1152	-222.19	-0.29598		1.1152	67.047	0.17225
	1.4002	43.351	0.051832		1.4002	-205.57	-0.16502		1.4002	78.537	0.19584
	1.8049	-43.86	0.085468		1.8049	2.8463	-0.27856		1.8049	116.58	0.23528
	2.3786	-34.266	0.12457		2.3786	13.162	-0.21345		2.3786	208.93	0.20355
	3.1224	-3.4571	0.19644		3.1224	233.88	-0.058816		3.1224	274.77	0.21996
	4.3053	319.08	0.72542		4.3053	171.01	0.81045		4.3053	182.88	0.14316
	5.7043	360.01	0.68715		5.7043	509.46	1.3357		5.7043	209.05	0.51047
	7.3322	270.04	0.64066		7.3322	537.94	0.93682		7.3322	409.52	0.67385
	8.747	357.37	0.60213		8.747	585.19	1.2856		8.747	431.29	0.67672
	9.74	298.08	1		9.74	650.15	1		9.74	397.69	1
	1.0369	601.34	0.21312		1.0369	-260.49	-1.1272		1.0369	88.498	0.30512
	1.1152	579.5	0.14671		1.1152	-338.05	-1.0059		1.1152	189.29	0.85415
	1.4002	676.47	0.12193		1.4002	-294.16	-0.68896		1.4002	499.93	0.27838
	1.8049	600.14	0.081921		1.8049	-153.9	-0.6342		1.8049	1154.4	0.55089
	2.3786	717.01	0.095149		2.3786	-101.27	-0.98095		2.3786	1660.8	0.18189
	3.1224	726.55	0.20597		3.1224	-145.8	-0.38478		3.1224	1942.5	0.57529
	4.3053	1180.6	0.53225		4.3053	456.92	0.21242		4.3053	836.22	0.30864
	5.7043	1185	0.73999		5.7043	1110.3	0.092468		5.7043	1464.8	0.50812
	7.3322	1737.7	1.1504		7.3322	1042.3	0.733		7.3322	2440.8	0.89046
	8.747	1831.5	1.6017		8.747	1023.3	2.2907		8.747	4142.6	1.0744
	9.74	1788.1	1		9.74	1083.1	1		9.74	4581.1	1
	1.0369	2438.3	0.78302		1.0369	52.434	-0.074832		1.0369	326.48	0.12468
	1.1152	2143.2	0.48655		1.1152	281.67	-0.11436		1.1152	177.51	-0.005339
	1.4002	2352.2	0.49468		1.4002	-15.172	-0.10177		1.4002	201.03	0.060181
	1.8049	2447.1	0.0071129		1.8049	267.41	-0.10972		1.8049	137.19	0.1385
	2.3786	2219.3	0.11921		2.3786	312.47	-0.097451		2.3786	93.155	0.18576
	3.1224	2601.2	0.65447		3.1224	415.06	0.064652		3.1224	142.7	0.41262
	4.3053	2935.3	0.36924		4.3053	776.48	0.12365		4.3053	467.98	0.26536
	5.7043	3668.1	0.78388		5.7043	889.9	0.66173		5.7043	430.59	0.85436
	7.3322	4194.7	0.1144		7.3322	1271.2	0.67272		7.3322	405.63	0.81944
	8.747	4753	0.60667		8.747	1270.1	1.3184		8.747	430.23	0.87132
	9.74	4810.1	1		9.74	1334.1	1		9.74	438.28	1
	1.0369	576.19	0.12953		1.0369	757.27	-0.51678		1.0369	523.24	0.43081
	1.1152	446.37	0.23226		1.1152	118.56	-0.70903		1.1152	447.93	0.46438
	1.4002	487.04	0.053082		1.4002	148.26	-0.56156		1.4002	488.16	0.44835
	1.8049	387.12	0.13948		1.8049	172.98	-0.69681		1.8049	419.22	0.51657
	2.3786	427.87	-0.029105		2.3786	142.4	-0.60647		2.3786	534.54	0.54813
	3.1224	726.1	0.1234		3.1224	251.68	-0.61884		3.1224	611.48	0.59355
	4.3053	912.12	0.53003		4.3053	1877.7	-0.38187		4.3053	931.23	0.4063
	5.7043	1057.8	0.48676		5.7043	2105.1	-0.277		5.7043	993.56	0.56532
	7.3322	1503.1	0.78629		7.3322	2092.7	-0.0080981		7.3322	1068	0.69753
	8.747	2059.3	1.176		8.747	2746.2	-0.17443		8.747	1223.2	0.8311
	9.74	1976.6	1		9.74	2916.5	1		9.74	1330.1	1
	1.0369	64.834	-0.18083		1.0369	1533.6	-0.095767		1.0369	653.06	0.13162
	1.1152	103.03	0.17857		1.1152	1502.4	-0.31895		1.1152	575.98	0.0019654
	1.4002	-31.012	0.46353		1.4002	1276.8	-0.19325		1.4002	474.19	-0.01274
	1.8049	-95.165	0.14872		1.8049	1513.3	-0.13474		1.8049	460.95	0.14552
	2.3786	19.364	0.47691		2.3786	1065.7	-0.16828		2.3786	520.14	0.16786
	3.1224	191.72	0.25072		3.1224	1580.3	-0.06346		3.1224	579.22	0.17793
	4.3053	305.89	0.81656		4.3053	2740	0.59396		4.3053	891.05	0.14676
	5.7043	393.04	0.81171		5.7043	3507.3	0.97605		5.7043	1060	0.46418
	7.3322	508.89	0.77649		7.3322	4424.1	0.51682		7.3322	1313.9	0.82977
	8.747	342.4	0.80304		8.747	4941.3	0.74403		8.747	1451.6	0.92222
	9.74	410.88	1		9.74	7296.4	1		9.74	1504.2	1
	1.0369	290.83	0.33778		1.0369	475.64	0.15958		1.0369	1598.5	-0.092927
	1.1152	371	0.28539		1.1152	1067.1	0.030713		1.1152	1377.8	0.46448
	1.4002	229.88	0.19204		1.4002	1515.7	0.13798		1.4002	1325	0.71038
	1.8049	352.93	0.34708		1.8049	1338.2	-0.16504		1.8049	1469.1	0.56424
	2.3786	344.94	0.34416		2.3786	1339.5	0.13389		2.3786	1807.5	0.63866
	3.1224	530.92	0.20298		3.1224	1221.8	0.16397		3.1224	1841.9	0.48773
	4.3053	550.25	0.41931		4.3053	647.25	0.49454		4.3053	1682.1	0.72165
	5.7043	890.08	0.5164		5.7043	1272.8	1.253		5.7043	2052.4	0.58951
	7.3322	1311.4	0.75073		7.3322	1404.6	1.2959		7.3322	2539.6	0.64694
	8.747	1802	0.98507		8.747	1346	1.0301		8.747	3194	0.58921
	9.74	1639.7	1		9.74	1498.5	1		9.74	3510.1	1
	1.0369	1763.7	-0.0082326		1.0369	1312.9	0.29775		1.0369	658.9	0.2068
	1.1152	1737.2	0.11798		1.1152	1244.4	-0.23009		1.1152	603.83	0.23751
	1.4002	1842.1	0.086805		1.4002	1128.2	0.16562		1.4002	567.03	0.19654
	1.8049	1501.2	0.14509		1.8049	1382.7	0.12317		1.8049	604.46	0.28261
	2.3786	1657	0.12938		2.3786	1146.3	0.20152		2.3786	638.53	0.29193
	3.1224	1892.7	0.33029		3.1224	1538.5	0.32328		3.1224	707.84	0.30489
	4.3053	2375.6	0.15834		4.3053	1800.8	0.37117		4.3053	841.64	0.12642
	5.7043	2878.7	0.14685		5.7043	2538.2	1.103		5.7043	1055	0.35868
	7.3322	3921.3	0.5442		7.3322	3154.8	0.95891		7.3322	1453.1	0.47452
	8.747	4036.7	0.79696		8.747	3680.7	1.2389		8.747	1687.3	0.80298
	9.74	4776.8	1		9.74	4306	1		9.74	1816.9	1
	1.0369	949.1	0.36176		1.0369	540.72	0.10339		1.0369	311.99	0.052338
	1.1152	1800	0.39673		1.1152	632.49	0.16431		1.1152	268.29	-0.054284
	1.4002	1841	0.46138		1.4002	609.62	0.1924		1.4002	248.84	0.010731
	1.8049	1787.8	0.37106		1.8049	696.47	0.11318		1.8049	228.47	0.091922
	2.3786	1788.9	0.33901		2.3786	716.04	0.12515		2.3786	207.33	0.28504
	3.1224	2079.2	0.37108		3.1224	795.05	0.18877		3.1224	268.41	0.093845
	4.3053	2361	0.60263		4.3053	1308.8	0.26182		4.3053	345.98	0.21965
	5.7043	3025.8	0.60623		5.7043	1604.3	0.58877		5.7043	487.89	0.41996
	7.3322	3582.4	0.77955		7.3322	1982.2	0.63818		7.3322	493.31	0.66328
	8.747	4501.7	0.96445		8.747	2368.3	0.76403		8.747	518.7	1.0198
	9.74	4961.5	1		9.74	2613.7	1		9.74	466.43	1
	1.0369	1414.1	-0.0011786		1.0369	1675.6	0.47996		1.0369	649.35	0.32549
	1.1152	514.98	0.23016		1.1152	1747.9	0.26541		1.1152	628.19	0.27407
	1.4002	493.66	0.18676		1.4002	1771.5	0.46491		1.4002	759.02	0.21758
	1.8049	555.73	0.22458		1.8049	2188.8	0.51522		1.8049	800.36	0.17276
	2.3786	899.54	0.22354		2.3786	2156.1	0.31869		2.3786	996.81	0.27202
	3.1224	793.43	0.33182		3.1224	2403.3	0.35878		3.1224	1082.7	0.22051
	4.3053	1051.9	0.43065		4.3053	2380.3	0.74419		4.3053	1029.5	0.35924
	5.7043	1259.7	0.93239		5.7043	3383.6	1.1547		5.7043	1457.9	0.46299
	7.3322	1537.4	1.2714		7.3322	4599.6	1.093		7.3322	2164.7	0.7666
	8.747	1715.8	0.73221		8.747	6038.2	1.4005		8.747	2627.8	1.0382
	9.74	1903.5	1		9.74	7520.2	1		9.74	2918.1	1
	1.0369	1835.2	0.5535		1.0369	-253.13	0.27504		1.0369	779.22	0.42002
	1.1152	1353.1	0.66752		1.1152	-341.17	0.47278		1.1152	755.82	-0.61298
	1.4002	1107.7	0.69427		1.4002	-476.11	-0.027547		1.4002	759	0.55224
	1.8049	1229.5	0.70096		1.8049	-901.18	0.48163		1.8049	839.53	0.28486
	2.3786	1624.2	0.80469		2.3786	-680.81	1.1731		2.3786	510.6	-0.23133
	3.1224	1668.7	0.86219		3.1224	-716.57	0.63601		3.1224	541.88	-0.12398
	4.3053	1636.3	0.97232		4.3053	81.277	1.3525		4.3053	1156.3	-0.25384
	5.7043	2017	0.53487		5.7043	96.795	1.848		5.7043	1166.9	-0.41445
	7.3322	2991.9	0.83555		7.3322	322.85	-1.2364		7.3322	1563.4	0.28456
	8.747	3743.3	0.78951		8.747	236.03	1.6436		8.747	1464.6	0.8871
	9.74	4547.5	1		9.74	-800.67	1		9.74	1465.5	1
	1.0369	694.89	0.53626		1.0369	892.45	0.36587		1.0369	603.89	0.19517
	1.1152	417.73	0.50028		1.1152	626.9	0.69009		1.1152	627.66	0.24706
	1.4002	479.47	0.50695		1.4002	751.83	0.39354		1.4002	485.26	0.21623
	1.8049	417.89	0.42502		1.8049	759.93	0.36019		1.8049	401.95	0.19484
	2.3786	501.04	0.55122		2.3786	759.34	0.26106		2.3786	343.67	0.393
	3.1224	488.78	0.66526		3.1224	908.06	0.60815		3.1224	428.56	0.39842
	4.3053	790.31	0.66258		4.3053	1490.7	0.53573		4.3053	732.27	0.16419
	5.7043	948.03	0.90269		5.7043	2203.3	0.78241		5.7043	746.21	0.48449
	7.3322	1243	1.0448		7.3322	2666.9	0.98327		7.3322	795.47	0.84627
	8.747	1321	1.1793		8.747	3319	1.0867		8.747	822.73	0.85584
	9.74	1496.8	1		9.74	4092.3	1		9.74	800.15	1
	1.0369	553.83	0.072649		1.0369	340.91	0.36118		1.0369	1424.4	0.22057
	1.1152	523.77	0.028456		1.1152	438.56	0.21747		1.1152	1094	0.23376
	1.4002	580.34	0.015015		1.4002	266.36	0.061697		1.4002	1011.6	0.14757
	1.8049	592.62	-0.0034721		1.8049	466.44	-0.14875		1.8049	1017.3	0.40024
	2.3786	870.64	0.20672		2.3786	484.89	0.089877		2.3786	1167	0.18049
	3.1224	830.5	0.12579		3.1224	271.23	0.70556		3.1224	1172.8	0.26576
	4.3053	1081.4	0.18799		4.3053	507.34	1.1683		4.3053	1405.9	0.311
	5.7043	1842.2	0.46085		5.7043	916.32	1.9409		5.7043	1559.8	0.51784
	7.3322	1981	0.71955		7.3322	1117.4	1.3731		7.3322	1789	0.66595
	8.747	2782.1	0.92008		8.747	1157.1	0.89286		8.747	1783.5	0.49364
	9.74	2993.1	1		9.74	1429.8	1		9.74	1839.6	1
	1.0369	782.22	0.31012		1.0369	0.11189	0.047426		1.0369	126.93	-0.031397
	1.1152	1085.1	0.28814		1.1152	-204.07	0.030746		1.1152	129.66	-0.21397
	1.4002	1084.9	0.2457		1.4002	-436.45	0.005079		1.4002	141.83	0.1919
	1.8049	1477.7	0.035538		1.8049	-183.87	0.034353		1.8049	11.766	0.028917
	2.3786	1580.7	0.23462		2.3786	43.504	0.050465		2.3786	-9.6106	0.18349
	3.1224	1646.2	0.46443		3.1224	68.129	0.17098		3.1224	-108.91	0.059425
	4.3053	1492.8	0.55204		4.3053	171.16	0.36121		4.3053	119.01	0.14606
	5.7043	2121.1	0.64798		5.7043	600.26	0.60549		5.7043	141.47	0.86381
	7.3322	2407	0.75547		7.3322	779.48	0.63449		7.3322	88.251	1.4683
	8.747	2874.5	0.88805		8.747	913.17	0.63115		8.747	70.192	1.9226
	9.74	3453.8	1		9.74	1061.3	1		9.74	172.62	1
	1.0369	1668.5	0.13353		1.0369	-1021.9	-0.083484		1.0369	88.196	0.034336
	1.1152	1960	0.18526		1.4002	319.78	0.10139		1.1152	94.736	0.057683
	1.4002	2464.1	0.42981		1.8049	109.74	0.20205		1.4002	94.851	0.016893
	1.8049	1601.7	0.40793		2.3786	-35.962	0.11647		1.8049	141.7	0.064174
	2.3786	1754.8	0.41718		3.1224	799.54	0.65491		2.3786	123.21	0.04837
	3.1224	2003.9	0.53724		5.7043	481.89	1.3775		3.1224	228.93	0.30284
	4.3053	2237.8	0.35275		7.3322	713.42	1.0436		4.3053	271.96	0.38232
	5.7043	2720.1	0.5047		8.747	587.5	1.7957		5.7043	230.4	0.88947
	7.3322	3090.7	0.9309		9.74	489.23	1		7.3322	273.83	0.96101
	8.747	3405.1	0.77223		1.0369	-703.31	0.013115		8.747	292.47	1.0134
	9.74	3856.9	1		1.1152	-837.38	-0.013605		9.74	304.17	1
	1.0369	215.71	0.40277		1.4002	-1139.6	-0.047394		1.0369	2589.8	0.54859
	1.1152	192.67	0.19286		1.8049	-1112.7	0.04528		1.1152	2685.3	0.37928
	1.4002	156.15	0.24236		2.3786	-767.46	0.19538		1.4002	2745.4	0.38832
	1.8049	180.62	0.12579		3.1224	-745.48	0.097868		1.8049	2504.7	0.50314
	2.3786	190.97	0.36713		4.3053	-543.8	0.87092		2.3786	3054.4	0.22001
	3.1224	262.48	0.43038		5.7043	-706.57	1.1526		3.1224	2812	0.63531
	4.3053	483.46	1.1315		7.3322	-607.92	1.0451		4.3053	2884.5	0.104
	5.7043	517.03	1.157		8.747	-383.99	1.7798		5.7043	2978.1	0.44858
	7.3322	723.06	1.4211		9.74	-397.21	1		7.3322	3645.6	1.2629
	8.747	624.97	1.234		1.0369	757.99	0.50432		8.747	4436.5	1.5567
	9.74	617.51	1		1.1152	547	0.42878		9.74	5242.9	1
	1.0369	367.3	0.14077		1.4002	707.21	0.25767		1.0369	283.07	0.42512
	1.1152	185.17	-0.069261		1.8049	869.78	0.34706		1.1152	264.34	0.30369
	1.4002	168.71	0.29866		2.3786	822.75	0.42125		1.4002	308.35	0.30714
	1.8049	281.39	0.4572		3.1224	1204.1	0.3805		1.8049	362.21	0.26011
	2.3786	234.67	0.32802		4.3053	2054.7	0.57551		2.3786	460.49	0.54321
	3.1224	313.82	0.45671		5.7043	2345.7	0.79779		3.1224	492.85	0.50404
	4.3053	397.61	1.0654		7.3322	3531.2	0.90389		4.3053	486.43	0.25875
	5.7043	541.44	1.6315		8.747	4456.4	1.2005		5.7043	517.78	0.3419
	7.3322	643.08	1.1959		9.74	4532.4	1		7.3322	855.15	0.52098
	8.747	701.32	1.3868		1.0369	189.29	0.18391		8.747	901.74	0.81549
	9.74	648.5	1		1.1152	129.99	0.082209		9.74	924.3	1
	1.0369	599.08	0.33535		1.4002	204.47	0.0040885		1.0369	144.09	-0.064734
	1.1152	426.88	0.44459		1.8049	90.951	0.11413		1.1152	220.82	0.026937
	1.4002	440.79	0.43581		2.3786	331.9	0.078868		1.4002	278.72	0.093025
	1.8049	645.45	0.40894		3.1224	287.65	0.25038		1.8049	296.87	0.012334
	2.3786	667.03	0.45844		4.3053	226.39	0.79435		2.3786	386.18	0.17329
	3.1224	833.16	0.61304		5.7043	30.015	0.933		3.1224	381.52	0.15837
	4.3053	973.17	0.48846		7.3322	251.27	1.1301		4.3053	347.23	0.1915
	5.7043	1317.4	0.41506		8.747	312.5	1.111		5.7043	359.16	0.31007
	7.3322	1660.1	0.64832		9.74	358.13	1		7.3322	579.9	0.73824
	8.747	2135.3	0.6934		1.0369	1378.8	0.17397		8.747	615.48	0.95252
	9.74	2297.5	1		1.1152	1558.3	0.08358		9.74	593.01	1
	1.0369	284.21	0.097079		1.4002	1288.3	0.051737		1.0369	1237.8	-0.20855
	1.1152	466.03	0.1058		1.8049	947.47	0.14597		1.1152	988.69	0.18769
	1.4002	521.77	0.031035		2.3786	1081.2	0.18428		1.4002	1227.6	0.10106
	1.8049	529.02	0.018577		3.1224	2161	0.47832		1.8049	959.34	0.084562
	2.3786	611.26	0.14425		4.3053	3232.8	0.43153		2.3786	1251.9	0.21025
	3.1224	764.92	0.23437		5.7043	2672.3	0.56978		3.1224	1675.5	0.18942
	4.3053	1319.6	0.50581		7.3322	4333.1	0.56137		4.3053	1498.3	0.16882
	5.7043	1798.6	0.84732		8.747	4379.7	0.7816		5.7043	1832.6	0.45026
	7.3322	2065.4	0.88941		9.74	6739.9	1		7.3322	1802.1	0.89873
	8.747	2143.8	0.99726		1.0369	934.23	0.16198		8.747	2506	1.1862
	9.74	2595.2	1		1.1152	839.01	0.10333		9.74	2346.1	1
	1.0369	2456.9	0.12702		1.4002	734.86	0.046234		1.0369	92.625	-0.020163
	1.1152	2274	0.45027		1.8049	884.16	0.0033378		1.1152	38.135	-0.05087
	1.4002	3462.4	0.44518		2.3786	607.1	0.022411		1.4002	17.239	-0.02648
	1.8049	2543.9	0.30376		3.1224	754	0.039202		1.8049	45.966	-0.026355
	2.3786	3774.4	0.65811		4.3053	1568.1	0.34206		2.3786	132.29	-0.048093
	3.1224	3220.3	0.42656		5.7043	1929	0.66856		3.1224	199.99	-0.016619
	4.3053	3156.8	0.87129		7.3322	2708	0.98508		4.3053	118.26	0.57919
	5.7043	3514.5	0.95144		8.747	3107.9	0.68059		5.7043	158.63	0.73036
	7.3322	4284.3	1.1545		9.74	3324.9	1		7.3322	275.53	0.97893
	8.747	6795.9	0.84812		1.0369	205.58	0.17124		8.747	324.51	1.2343
	9.74	6382.1	1		1.1152	-97.453	0.17295		9.74	248.45	1
	1.0369	225.14	0.27132		1.4002	232.22	0.26377		1.0369	252.89	0.21873
	1.1152	315.71	0.066683		1.8049	-42.721	0.17997		1.1152	234.72	0.23696
	1.4002	373.17	0.38697		2.3786	-205.51	0.18106		1.4002	243.71	0.37822
	1.8049	382.33	0.21714		3.1224	-3.6152	0.23733		1.8049	223.15	0.17238
	2.3786	348.18	0.21039		4.3053	491.15	0.2938		2.3786	232.35	0.21166
	3.1224	384.18	0.56777		5.7043	446.9	0.99464		3.1224	233.4	0.45677
	4.3053	816.8	0.38065		7.3322	592.42	0.94419		4.3053	329.7	0.57716
	5.7043	1242.9	0.45054		8.747	888.02	1.1134		5.7043	379.94	0.52768
	7.3322	1712.6	0.74762		9.74	559.26	1		7.3322	335.61	0.79773
	8.747	1726.1	0.86558		1.0369	319.48	0.17246		8.747	306.97	0.82367
	9.74	1604.4	1		1.1152	378.09	0.26455		9.74	385.69	1
	1.0369	248.28	0.6		1.4002	399.75	0.31521		1.0369	825.21	1.5999
	1.1152	152.05	0.34347		1.8049	189.67	0.35521		1.1152	1069.8	1.6375
	1.4002	111.66	0.36989		2.3786	299.3	0.36509		1.4002	1268.4	0.6993
	1.8049	83.739	0.52057		3.1224	580.14	0.40897		1.8049	1119.9	1.2572
	2.3786	186.39	0.44207		4.3053	923.49	0.58911		2.3786	1106.9	2.018
	3.1224	242.25	0.73914		5.7043	1472.9	0.81053		3.1224	1234.6	1.5554
	4.3053	303.28	0.37699		7.3322	2062.9	0.78747		4.3053	1204.5	1.7741
	5.7043	273.84	0.86989		8.747	2363.4	0.91224		5.7043	1680	0.68302
	7.3322	322.49	0.5951		9.74	2792.8	1		7.3322	1829.8	1.9388
	8.747	271.79	1.3255		1.0369	-159.71	0.15457		8.747	2093.3	0.65437
	9.74	362.94	1		1.1152	-374.7	0.10044		9.74	1664.3	1
	1.0369	227.41	-0.078979		1.4002	-347.58	0.091476		1.0369	69.578	0.34521
	1.1152	-12.708	0.09605		1.8049	-109.64	0.1081		1.1152	263.38	-0.22784
	1.4002	103.76	0.11466		2.3786	-388.88	0.18928		1.4002	527.2	-0.032421
	1.8049	163.66	-0.03874		3.1224	-27.611	0.13042		1.8049	559.77	0.034331
	2.3786	114.11	0.15117		4.3053	189.02	0.33358		2.3786	374.26	0.071756
	3.1224	153.54	0.31549		5.7043	-37.576	0.78759		3.1224	333.48	0.034372
	4.3053	211.58	0.66258		7.3322	48.095	1.4788		4.3053	505.59	0.48741
	5.7043	247.09	1.132		8.747	-152.3	1.4171		5.7043	428.07	0.24565
	7.3322	324.01	1.3852		9.74	-105.68	1		7.3322	431.81	0.62962
	8.747	287.45	1.6774		1.0369	-575.23	0.7095		8.747	210.28	1.0183
	9.74	299.91	1		1.1152	-1010.5	0.71347		9.74	417.15	1
	1.0369	265.17	0.020296		1.4002	-880.47	0.50947		1.0369	1136.4	0.33264
	1.1152	123.21	-0.0054252		1.8049	-343.09	0.58764		1.1152	1243.6	0.55159
	1.4002	76.093	0.073599		2.3786	-608.93	0.68179		1.4002	1028.9	0.14951
	1.8049	106.68	0.041318		3.1224	-708.52	0.91625		1.8049	1010.9	0.4552
	2.3786	105.65	0.17426		4.3053	28.758	0.59166		2.3786	938.88	0.45963
	3.1224	222.36	0.27492		5.7043	-420	1.6493		3.1224	908.83	0.62182
	4.3053	371.08	0.37455		7.3322	-9.7808	1.519		4.3053	1355.9	0.71857
	5.7043	418.19	0.31219		8.747	-152.55	2.1474		5.7043	1249.2	0.49834
	7.3322	617.14	0.56043		9.74	-66.919	1		7.3322	1227.6	0.82616
	8.747	723.59	0.49455		1.0369	323.14	0.2332		8.747	1346.2	0.95801
	9.74	856.96	1		1.1152	372.12	0.69375		9.74	1448.3	1
	1.0369	1050.2	0.20515		1.4002	241.01	0.64159		1.0369	624.63	0.64835
	1.1152	1020.5	0.27187		1.8049	418.09	0.015033		1.1152	609.99	0.3415
	1.4002	1237.5	0.36355		2.3786	422.46	0.69429		1.4002	787.57	0.40782
	1.8049	894.29	0.42872		3.1224	359.65	0.58996		1.8049	849.46	0.6929
	2.3786	1140.4	0.40381		4.3053	507.09	0.39994		2.3786	829	0.23613
	3.1224	1039.2	0.28637		5.7043	744.06	0.9915		3.1224	831.38	0.53426
	4.3053	1633.2	0.4026		7.3322	827.92	0.96447		4.3053	1020.5	0.56945
	5.7043	2180.8	0.54024		8.747	744.63	1.0348		5.7043	1003.4	0.67926
	7.3322	2608.2	0.2979		9.74	731.12	1		7.3322	1143.5	0.99971
	8.747	2615.4	0.70554		1.0369	1077.6	0.83805		8.747	1093.6	0.62873
	9.74	2947.3	1		1.1152	1023.9	0.75516		9.74	1305.1	1
	1.0369	571.66	0.096994		1.4002	999.8	0.69		1.0369	240.4	0.17059
	1.1152	300.36	0.27107		1.8049	1086.8	0.68893		1.1152	198.29	0.088189
	1.4002	261.06	0.18796		2.3786	1091.2	0.77244		1.4002	176.26	0.072436
	1.8049	311.89	0.28823		3.1224	1253.1	0.7275		1.8049	171.02	0.17302
	2.3786	379.7	0.45635		4.3053	1657	0.60823		2.3786	196.16	0.084578
	3.1224	518.25	0.36954		5.7043	1777.3	0.78738		3.1224	206.82	0.17685
	4.3053	603.7	0.53658		7.3322	2077.7	0.82457		4.3053	309.04	0.30853
	5.7043	643.6	0.82408		8.747	2330.4	1.0402		5.7043	298.88	0.70013
	7.3322	848.37	1.0744		9.74	2464.6	1		7.3322	353.83	0.47909
	8.747	927.71	1.1702		1.0369	302.12	0.72405		8.747	336.77	0.82978
	9.74	1146.1	1		1.1152	205.69	0.91377		9.74	352.83	1
	1.0369	843.27	0.47539		1.4002	51.108	0.88566		1.0369	279.67	0.0076817
	1.1152	890.3	0.47384		1.8049	82.454	0.6608		1.1152	343.36	0.48349
	1.4002	1120.2	0.33712		2.3786	98.1	1.0377		1.4002	479.73	0.85463
	1.8049	1249	0.4226		3.1224	210.35	0.89146		1.8049	419.82	0.64405
	2.3786	1035.7	0.47665		4.3053	575.24	0.89031		2.3786	384.89	0.72712
	3.1224	1563	0.42674		5.7043	466.49	1.0253		3.1224	664.4	1.1461
	4.3053	1520.9	0.73347		7.3322	766.99	0.98771		4.3053	540.05	1.0034
	5.7043	1627.8	0.61247		8.747	717.43	0.90527		5.7043	651.16	1.1372
	7.3322	2093.2	0.68782		9.74	793.88	1		7.3322	659.6	1.1279
	8.747	2677.2	0.78956		1.0369	477.96	-0.056354		8.747	746.91	1.9738
	9.74	2563.2	1		1.1152	175.96	0.35415		9.74	764.68	1
	1.0369	-87.119	0.11151		1.4002	197.69	0.084679		1.0369	278.66	0.92063
	1.1152	-145.66	0.21579		1.8049	-46.508	0.34163		1.1152	303.81	0.87379
	1.4002	-48.278	0.0012564		2.3786	340.42	0.31653		1.4002	314.18	0.82478
	1.8049	-83.513	0.33942		3.1224	-330.08	0.7053		1.8049	296.52	0.75825
	2.3786	-20.51	0.25439		4.3053	832.35	1.2552		2.3786	379.55	0.92174
	3.1224	-72.529	0.34871		5.7043	596.5	3.4263		3.1224	290.84	0.81704
	4.3053	-32.296	1.9049		7.3322	452.83	13.332		4.3053	434.77	0.99824
	5.7043	69.089	1.8864		8.747	902.72	1.3492		5.7043	435.57	0.75056
	7.3322	51.404	1.722		9.74	173.57	1		7.3322	595.11	0.98467
	8.747	77.962	1.4254		1.0369	436.24	0.58942		8.747	646.35	1.0023
	9.74	99.431	1		1.1152	465.85	0.69566		9.74	800.28	1
	1.0369	1676.6	0.0098157		1.4002	613.57	1.0385		1.0369	58.759	0.41356
	1.1152	1396.3	-0.11995		1.8049	622.72	0.93364		1.1152	45.739	0.11822
	1.4002	1364	-0.0058634		2.3786	615.92	0.88969		1.4002	7.087	0.10576
	1.8049	987.1	0.042863		3.1224	800.1	1.0438		1.8049	41.655	0.29796
	2.3786	1198.9	0.10632		4.3053	874.23	0.90057		2.3786	42.995	0.37421
	3.1224	1151.3	0.030597		5.7043	986.11	1.3304		3.1224	88.762	0.21693
	4.3053	1657.3	0.062149		7.3322	964.38	1.8401		4.3053	90.597	0.59175
	5.7043	2035.7	0.22708		8.747	1219.1	2.5291		5.7043	142.23	0.98337
	7.3322	2743.6	0.51419		9.74	1348.2	1		7.3322	137.34	0.25625
	8.747	3622.9	0.7579		1.0369	-124.86	0.10095		8.747	205.38	1.1497
	9.74	4171.3	1		1.1152	-223.36	-0.1092		9.74	158.08	1
	1.0369	123.45	0.91882		1.4002	-193.86	0.013797		1.0369	764	0.82438
	1.1152	373.4	1.2398		1.8049	-291.64	-0.0093271		1.1152	841.49	0.7036
	1.4002	278.69	0.78544		2.3786	-89.958	-0.013002		1.4002	930.44	0.8861
	1.8049	412.31	0.44713		3.1224	-56.869	-0.022936		1.8049	761.43	0.63792
	2.3786	425.72	0.74283		4.3053	75.739	0.2356		2.3786	714.67	0.81299
	3.1224	636.21	0.72819		5.7043	97.885	0.61879		3.1224	1014.8	0.43217
	4.3053	543.5	1.4863		7.3322	65.303	1.2906		4.3053	1013.9	0.84414
	5.7043	625.66	1.3061		8.747	183.55	1.2566		5.7043	1016.5	0.77819
	7.3322	717.71	0.99314		9.74	123.64	1		7.3322	1139.4	0.75229
	8.747	709.11	1.1638		1.0369	565.14	0.42522		8.747	1370.3	0.9563
	9.74	524.27	1		1.1152	474.11	0.57132		9.74	1421.8	1
	1.0369	87.075	0.22083		1.4002	530.9	0.56363		1.0369	75.499	0.40864
	1.1152	56.616	0.070273		1.8049	636.92	0.55378		1.1152	242.18	0.37568
	1.4002	20.895	0.11704		2.3786	665.52	0.75985		1.4002	-59.907	0.38377
	1.8049	49.655	0.17397		3.1224	653.81	0.7075		1.8049	127.37	0.73702
	2.3786	45.075	0.072272		4.3053	594.53	0.65465		2.3786	96.193	0.81875
	3.1224	48.695	0.18757		5.7043	956.28	0.87474		3.1224	78.806	1.1331
	4.3053	121.16	0.69473		7.3322	1176.2	0.97837		4.3053	347.41	0.50874
	5.7043	198.98	0.82288		8.747	1207.8	0.93198		5.7043	218.85	2.3876
	7.3322	259.8	1.1538		9.74	1403.8	1		7.3322	315.25	1.424
	8.747	309.59	0.94392		1.0369	264.68	0.065322		8.747	334.43	2.2029
	9.74	258.7	1		1.1152	412.27	0.22997		9.74	440.04	1
	1.0369	199.8	0.19662		1.4002	468.72	0.29909		1.0369	675.1	0.93957
	1.1152	202.9	0.10405		1.8049	611.68	0.27797		1.1152	705.57	-0.023229
	1.4002	161.53	0.14077		2.3786	828.56	0.29941		1.4002	695.21	0.37288
	1.8049	179.69	0.0734		3.1224	975.77	0.30907		1.8049	689.12	0.40123
	2.3786	175.96	0.057355		4.3053	774.15	0.84237		2.3786	650.79	0.31729
	3.1224	189.18	0.086518		5.7043	1005.9	2.0681		3.1224	638.77	0.087952
	4.3053	329.54	0.47431		7.3322	955.58	2.2079		4.3053	841.04	0.95864
	5.7043	325.46	0.52324		8.747	1321.5	2.4741		5.7043	727.29	0.89623
	7.3322	353.51	1.1526		9.74	1235.5	1		7.3322	830.78	0.96622
	8.747	340.66	0.95364		1.0369	160.18	0.2065		8.747	768.96	0.67328
	9.74	332.84	1		1.1152	263.96	0.46419		9.74	781.09	1
	1.0369	745.63	0.36582		1.4002	452.85	0.50256		1.0369	70.883	0.24051
	1.1152	631.76	0.20087		1.8049	547	0.59367		1.1152	265.46	0.0236
	1.4002	545.38	0.47223		2.3786	641.17	0.45598		1.4002	195.75	0.11749
	1.8049	519.49	0.42987		3.1224	638.64	0.72348		1.8049	220.06	-0.026066
	2.3786	586.94	0.46775		4.3053	662.77	0.4273		2.3786	144.53	0.042908
	3.1224	642.18	0.59151		5.7043	840.9	1.1612		3.1224	121.98	0.12055
	4.3053	701.26	0.39074		7.3322	1126	1.0241		4.3053	521.34	0.22577
	5.7043	957.21	0.67958		8.747	1214.5	1.1395		5.7043	328.2	0.63251
	7.3322	1159.3	0.78862		9.74	1309.4	1		7.3322	437.1	0.52695
	8.747	1703.5	0.67255		1.0369	12.768	0.05103		8.747	388.69	0.98674
	9.74	2110.2	1		1.1152	-15.879	0.14226		9.74	381.12	1
	1.0369	557.63	0.52275		1.4002	38.145	0.025497		1.0369	249.97	0.2066
	1.1152	483.09	0.2005		1.8049	-140.78	0.16306		1.1152	254.14	0.15886
	1.4002	468.49	0.51282		2.3786	-105.91	-0.013797		1.4002	225.3	0.31086
	1.8049	558.48	0.44962		3.1224	-81.947	0.09399		1.8049	272.45	0.31144
	2.3786	548.46	0.40826		4.3053	298.3	0.29779		2.3786	242.46	0.36527
	3.1224	672.33	0.28168		5.7043	182.3	0.91243		3.1224	319.46	0.18655
	4.3053	557.58	0.11911		7.3322	352.19	0.90481		4.3053	285.27	0.38458
	5.7043	773.87	0.60729		8.747	368.72	1.3573		5.7043	309.32	0.56927
	7.3322	842.72	0.73		9.74	451.45	1		7.3322	339.05	0.77575
	8.747	1468.9	0.88005		1.0369	695.36	-0.10647		8.747	365.52	0.85851
	9.74	1567.3	1		1.1152	673.53	1.3089		9.74	332.51	1
	1.0369	165.08	0.13926		1.4002	638.05	1.651		1.0369	260.03	0.1651
	1.1152	118.22	0.24276		1.8049	658.7	1.1586		1.1152	255.59	0.10354
	1.4002	119.89	-0.031551		2.3786	752	0.93507		1.4002	325.64	0.22236
	1.8049	126.68	0.11288		3.1224	743.96	1.2405		1.8049	391.14	0.13508
	2.3786	103.94	0.067758		4.3053	1210.9	0.86543		2.3786	415.41	0.23381
	3.1224	129.34	0.10714		5.7043	1450.5	0.79367		3.1224	376.46	0.079729
	4.3053	137.11	0.51546		7.3322	1654.3	0.74963		4.3053	400.71	0.77911
	5.7043	226.75	0.92015		8.747	1870.6	0.87704		5.7043	439.09	0.8512
	7.3322	283.09	0.89105		9.74	1991.1	1		7.3322	540.24	0.95381
	8.747	320.85	1.0036		1.0369	226.22	0.21074		8.747	637.67	1.5983
	9.74	368.45	1		1.1152	167.86	0.29777		9.74	664.9	1
	1.0369	187.1	0.14471		1.4002	294.81	0.15043		1.0369	360.91	0.36411
	1.1152	90.705	0.10127		1.8049	79.21	0.11605		1.1152	285.32	0.16542
	1.4002	53.884	0.16499		2.3786	121.82	0.30756		1.4002	360.92	0.1924
	1.8049	5.0192	0.082466		3.1224	120.42	0.33864		1.8049	376.11	0.22814
	2.3786	88.645	0.10086		4.3053	540.6	0.55779		2.3786	423.31	0.24929
	3.1224	74.958	0.1937		5.7043	462.21	0.74077		3.1224	539.8	0.22908
	4.3053	129.2	0.9004		7.3322	550.86	0.78821		4.3053	367.9	0.52301
	5.7043	137.31	1.2481		8.747	581.88	0.89976		5.7043	576.11	0.6262
	7.3322	123.97	1.1448		9.74	592.46	1		7.3322	536.61	0.74196
	8.747	93.522	1.0781		1.0369	389.75	0.29356		8.747	623.07	0.80322
	9.74	154.67	1		1.1152	313.08	0.36885		9.74	572.4	1
	1.0369	35.154	-0.023298		1.4002	429.33	0.27547		1.0369	482.04	0.72458
	1.1152	18.574	0.070416		1.8049	231.01	0.30477		1.1152	417.62	0.33708
	1.4002	33.535	0.14288		2.3786	338.22	0.28932		1.4002	428.83	0.61185
	1.8049	41.698	0.1266		3.1224	388.37	0.18782		1.8049	366.62	0.56784
	2.3786	47.161	0.033636		4.3053	864.54	0.43341		2.3786	355.23	0.77608
	3.1224	68.262	0.077484		5.7043	1089.2	0.76703		3.1224	417.3	0.53202
	4.3053	102.02	0.7225		7.3322	1134.3	0.66349		4.3053	531.61	0.75158
	5.7043	124.57	0.79345		8.747	1493.4	0.8799		5.7043	578.36	0.95432
	7.3322	113.28	0.82431		9.74	1460.3	1		7.3322	530.94	1.2557
	8.747	90.665	1.0989		1.0369	72.453	0.029771		8.747	533.49	1.6666
	9.74	74.795	1		1.1152	-31.658	0.036259		9.74	478.12	1
	1.0369	4.3545	0.1055		1.4002	-34.332	0.094977		1.0369	67.922	0.18769
	1.1152	-7.6171	0.047746		1.8049	-10.262	-0.036454		1.1152	76.908	0.0362
	1.4002	-5.726	0.048006		2.3786	29.455	-0.007428		1.4002	18.606	0.28502
	1.8049	0.57072	0.027608		3.1224	59.099	0.079026		1.8049	26.107	0.13638
	2.3786	19.07	0.052077		4.3053	172.82	0.2539		2.3786	0.64373	0.12071
	3.1224	14.938	0.077294		5.7043	177.68	0.3507		3.1224	87.678	0.20369
	4.3053	37.034	0.64842		7.3322	148.71	0.71437		4.3053	99.536	0.6592
	5.7043	51.718	0.65926		8.747	219.32	0.79278		5.7043	100.33	0.73686
	7.3322	76.047	0.98854		9.74	200.71	1		7.3322	35.937	1.2215
	8.747	130.01	1.2266		1.0369	1013.2	0.55824		8.747	38.562	1.1534
	9.74	142.09	1		1.1152	941.97	0.48882		9.74	70.519	1
	1.0369	104.08	-0.071736		1.4002	902.52	0.63128		1.0369	591.24	-0.37264
	1.1152	105.76	0.071224		1.8049	1024.5	0.41023		1.1152	559.78	-0.11719
	1.4002	67.616	0.049736		2.3786	1038.8	0.37959		1.4002	482.48	0.23594
	1.8049	95.178	0.022529		3.1224	1181.2	0.52863		1.8049	559.39	0.23846
	2.3786	113.67	0.055178		4.3053	1214	0.58018		2.3786	578.8	0.18537
	3.1224	115.51	0.30633		5.7043	1483.4	0.84354		3.1224	565.35	0.22559
	4.3053	103.54	0.96096		7.3322	1861.1	1.1237		4.3053	666.57	0.3006
	5.7043	214.47	1.4189		8.747	2118.6	0.91471		5.7043	722.45	0.28359
	7.3322	122.55	1.2939		9.74	2080.8	1		7.3322	807.78	0.83162
	8.747	140.7	1.3387		1.0369	386.77	0.18321		8.747	826.9	1.2119
	9.74	222.63	1		1.1152	271.5	0.1894		9.74	1182.9	1
	1.0369	42.544	0.25611		1.4002	241.5	0.23133		1.0369	235.14	0.015891
	1.1152	14.537	0.28177		1.8049	203.24	0.31608		1.1152	407.91	-0.019325
	1.4002	14.884	0.24743		2.3786	401.93	0.21377		1.4002	19.012	0.052979
	1.8049	30.424	0.37017		3.1224	453.86	0.2955		1.8049	75.906	0.11662
	2.3786	53.971	0.50172		4.3053	777.78	0.30177		2.3786	89.903	0.23146
	3.1224	63.264	0.61098		5.7043	905.66	0.66591		3.1224	197.92	0.46973
	4.3053	124.18	0.37121		7.3322	1269.1	0.81399		4.3053	386.29	0.28659
	5.7043	148.91	0.72046		8.747	1502.1	0.65898		5.7043	556.76	0.28182
	7.3322	179.08	0.79408		9.74	1455.4	1		7.3322	677.46	0.4494
	8.747	236.57	0.60044		1.0369	592.17	0.28013		8.747	648.26	0.63503
	9.74	266.74	1		1.1152	663.11	0.59384		9.74	961.92	1
	1.0369	238.92	0.18298		1.4002	670.6	0.39329		1.0369	797.88	-0.1249
	1.1152	230.26	0.18294		1.8049	791.31	0.53945		1.1152	780.88	0.02098
	1.4002	314.67	-0.021543		2.3786	775.01	0.47155		1.4002	456.11	0.065307
	1.8049	336.43	0.19753		3.1224	1005.3	0.31554		1.8049	461.6	0.11824
	2.3786	297.8	0.25696		4.3053	1196.6	0.49945		2.3786	468.63	0.19668
	3.1224	311.57	0.35997		5.7043	963.93	0.70825		3.1224	561.7	0.26996
	4.3053	530.67	0.58606		7.3322	1289.8	0.96122		4.3053	766.52	0.48205
	5.7043	537.57	0.82662		8.747	1905.5	0.89888		5.7043	841.49	0.42006
	7.3322	660.73	0.71899		9.74	2101.8	1		7.3322	840.26	0.53983
	8.747	851.42	0.57287		1.0369	457.1	0.020755		8.747	1069	0.4412
	9.74	1068.1	1		1.1152	193.15	0.032335		9.74	1014.3	1
	1.0369	60.361	0.043004		1.4002	224.94	-0.030739		1.0369	239.25	0.3323
	1.1152	66.698	-0.0025748		1.8049	213.71	0.0073426		1.1152	141.8	0.057803
	1.4002	62.639	0.067673		2.3786	228.17	-0.029039		1.4002	155.4	0.34138
	1.8049	70.329	0.022742		3.1224	299.72	-0.023502		1.8049	185.7	0.17271
	2.3786	38.933	0.062229		4.3053	666.1	0.60179		2.3786	218.26	0.097323
	3.1224	58.535	0.088287		5.7043	821.49	0.56086		3.1224	141.63	0.50238
	4.3053	173.89	0.47745		7.3322	992.93	0.88674		4.3053	217.74	0.6479
	5.7043	134.13	0.62727		8.747	1365.6	0.74833		5.7043	272.48	0.91434
	7.3322	124.28	0.76354		9.74	1341	1		7.3322	285.29	0.81483
	8.747	152.3	0.86533		1.0369	-2.7632	0.58018		8.747	311.9	0.56841
	9.74	175.5	1		1.1152	197.95	0.53069		9.74	384.88	1
	1.0369	20.804	0.22947		1.4002	250.89	0.35328		1.0369	20.795	0.12091
	1.1152	0.62715	0.26495		1.8049	404.83	0.37742		1.1152	-14.982	-0.22565
	1.4002	-25.773	0.22064		2.3786	318.78	-0.1306		1.4002	28.281	0.080068
	1.8049	-70.963	0.11472		3.1224	540.02	0.47994		1.8049	66.984	-0.038684
	2.3786	-76.126	0.13437		4.3053	546.9	1.2793		2.3786	84.401	0.16457
	3.1224	-99.511	0.07901		5.7043	676.7	1.055		3.1224	140.84	0.15694
	4.3053	63.332	0.77534		7.3322	1102.8	1.4021		4.3053	64.372	0.42708
	5.7043	14.874	0.86985		8.747	1246.7	1.2982		5.7043	150.96	0.26544
	7.3322	-31.019	1.3435		9.74	1093.3	1		7.3322	207.69	1.1893
	8.747	-46.486	0.70573		1.0369	86.941	0.26487		8.747	229.72	0.93601
	9.74	-29.182	1		1.1152	57.933	0.23889		9.74	237.19	1
	1.0369	96.525	0.077578		1.4002	-19.685	-0.039678		1.0369	-80.638	0.13784
	1.1152	114.23	0.14864		1.8049	-7.0245	0.12922		1.1152	-109.24	0.066957
	1.4002	129.86	0.28021		2.3786	-60.269	0.17439		1.4002	-96.279	0.12107
	1.8049	137.34	0.21428		3.1224	27.325	0.11009		1.8049	-150.27	0.1125
	2.3786	147.27	0.14225		4.3053	118.29	0.42998		2.3786	-84.784	0.13057
	3.1224	151.02	0.20246		5.7043	125.32	0.76915		3.1224	-88.754	0.22147
	4.3053	190.56	1.1768		7.3322	168.97	1.3827		4.3053	-111.46	0.45558
	5.7043	204.94	1.3834		8.747	208.31	1.2922		5.7043	-98.732	0.63546
	7.3322	213.65	2.3556		9.74	360.95	1		7.3322	-37.098	0.83448
	8.747	179.44	1.1468		1.0369	587.3	0.27205		8.747	-7.2363	1.2646
	9.74	252.36	1		1.1152	579.55	0.11758		9.74	-46.575	1
	1.0369	434.24	0.12255		1.4002	651	0.47632		1.0369	947.45	3.4312
	1.1152	418.09	0.29355		1.8049	619.99	0.46178		1.1152	1067.8	3.9435
	1.4002	418.37	0.21402		2.3786	692.56	0.57613		1.4002	1313.2	3.9426
	1.8049	408.03	0.19462		3.1224	749.03	0.74114		1.8049	1324.2	3.6606
	2.3786	467.14	0.41535		4.3053	948.03	0.63243		2.3786	1447.6	6.2829
	3.1224	479.43	0.44507		5.7043	1165.8	0.59088		3.1224	1506.2	5.6409
	4.3053	729.12	0.14345		7.3322	1259.8	1.4938		4.3053	1330.4	2.8974
	5.7043	918.89	0.66642		8.747	1422.4	1.3722		5.7043	1188.8	3.7639
	7.3322	1071.4	1.0592		9.74	1593.1	1		7.3322	1350.3	0.97449
	8.747	1246	0.93894		1.0369	592.49	0.40493		8.747	1434.2	0.81069
	9.74	1157.7	1		1.1152	535.76	0.43343		9.74	1681.7	1
	1.0369	111.53	0.27758		1.4002	480.96	0.30107		1.0369	263.33	0.21097
	1.1152	132.63	0.14949		1.8049	360.49	0.68599		1.1152	190.73	-0.20655
	1.4002	87.369	0.27919		2.3786	438.18	0.73505		1.4002	74.985	0.14382
	1.8049	134.48	0.24322		3.1224	457.48	0.28207		1.8049	255.48	0.28076
	2.3786	135.04	0.31299		4.3053	700.5	0.51897		2.3786	102.58	0.25764
	3.1224	163.14	0.33319		5.7043	757.27	0.87998		3.1224	216.85	0.34608
	4.3053	230.32	0.45632		7.3322	735.32	0.97645		4.3053	303.11	0.59254
	5.7043	297.35	0.61149		8.747	806.5	1.2131		5.7043	213.94	0.68098
	7.3322	335.89	0.82912		9.74	786.25	1		7.3322	309.36	0.89543
	8.747	365.35	0.8372		1.0369	-17.918	0.11608		8.747	331.77	1.2502
	9.74	488.21	1		1.1152	2.8844	0.097649		9.74	248.08	1
	1.0369	40.653	0.11086		1.4002	4.8702	0.018051		1.0369	-63.487	0.19691
	1.1152	-0.12394	0.075547		1.8049	8.7556	0.05998		1.1152	375.07	0.33424
	1.4002	17.96	0.11633		2.3786	39.662	0.064757		1.4002	270.86	0.27342
	1.8049	1.249	0.12821		3.1224	-0.90186	0.10217		1.8049	593.44	0.25948
	2.3786	20.132	0.258		4.3053	123.49	0.4239		2.3786	523.64	0.035883
	3.1224	20.034	0.17605		5.7043	103.12	0.71164		3.1224	660.32	0.33416
	4.3053	37.957	0.42796		7.3322	165.24	0.71981		4.3053	685.01	0.17791
	5.7043	83.534	0.79148		8.747	149.41	0.90568		5.7043	627.92	0.37353
	7.3322	123.39	0.76614		9.74	170	1		7.3322	775.69	0.91035
	8.747	82.48	0.88647		1.0369	985.59	0.4937		8.747	776.62	0.99157
	9.74	122.37	1		1.1152	927.58	-0.055957		9.74	1125.1	1
	1.0369	630.65	0.41477		1.4002	940.88	0.20303		1.0369	354.32	0.28998
	1.1152	615.94	0.40738		1.8049	823.52	0.23389		1.1152	375.83	0.26884
	1.4002	638.32	0.428		2.3786	820.91	0.41048		1.4002	512.46	0.35311
	1.8049	666.75	0.57126		3.1224	717.93	0.095744		1.8049	504.17	0.42651
	2.3786	668.63	0.5355		4.3053	1136.5	0.66842		2.3786	604.47	0.55946
	3.1224	744.55	0.61543		5.7043	1294	0.95389		3.1224	585.87	0.38483
	4.3053	896.39	0.49758		7.3322	1480.3	0.83437		4.3053	546.01	0.41578
	5.7043	1064.1	0.59376		8.747	1386.8	0.93009		5.7043	667.07	0.69303
	7.3322	1401.1	0.86189		9.74	1500.3	1		7.3322	685.52	0.79302
	8.747	1795.5	1.0756		1.0369	595.53	0.024813		8.747	751.27	0.5184
	9.74	1806.3	1		1.1152	509.27	0.24686		9.74	704.59	1
	1.0369	435.85	0.26418		1.4002	480.85	0.15081		1.0369	604.76	0.89091
	1.1152	331.49	0.17686		1.8049	438.06	0.17611		1.1152	651.56	0.79072
	1.4002	335.81	0.50865		2.3786	448.27	0.20757		1.4002	718.93	0.86431
	1.8049	479.14	0.15019		3.1224	511.51	0.15799		1.8049	776.25	0.55614
	2.3786	475.52	0.27575		4.3053	690.86	0.24625		2.3786	714.05	0.96472
	3.1224	606.38	0.53823		5.7043	683.17	0.42946		3.1224	954.86	0.82444
	4.3053	623.46	0.23617		7.3322	747.28	0.57727		4.3053	922.69	0.90288
	5.7043	927.2	0.33872		8.747	644.83	0.88632		5.7043	918	0.7024
	7.3322	1294.2	0.66423		9.74	686.23	1		7.3322	1123.7	1.0722
	8.747	1624.5	0.7966		1.0369	59.859	0.54933		8.747	1264.9	1.0636
	9.74	1822.2	1		1.1152	-3.3017	0.38162		9.74	1445.7	1
	1.0369	48.798	0.15426		1.4002	13.164	0.38841		1.0369	724.23	0.25868
	1.1152	51.027	0.23305		1.8049	17.785	0.37046		1.1152	658.6	0.20136
	1.4002	70.07	0.21426		2.3786	8.2603	0.39179		1.4002	593.42	0.35735
	1.8049	145.97	0.15385		3.1224	15.055	0.43189		1.8049	590.15	0.20681
	2.3786	141.76	0.15053		4.3053	103.86	1.0405		2.3786	656.09	0.15704
	3.1224	171.85	0.22556		5.7043	36.95	1.5479		3.1224	620.52	0.43869
	4.3053	41.999	1.1268		7.3322	111.14	1.361		4.3053	794.56	0.31171
	5.7043	45.658	2.1567		8.747	42.677	1.3418		5.7043	698.45	0.37932
	7.3322	102.49	2.6197		9.74	24.009	1		7.3322	834.6	0.59927
	8.747	32.889	2.7629		1.0369	1599.3	-0.13637		8.747	927.67	0.89629
	9.74	134.59	1		1.1152	1678.6	0.55787		9.74	936.84	1
	1.0369	493.85	0.91108		1.4002	1818.9	1.1067		1.0369	110.06	0.10667
	1.1152	319.19	0.765		1.8049	1593	0.639		1.1152	70.608	0.036816
	1.4002	258.13	0.92323		2.3786	1431.6	0.68137		1.4002	88.213	0.14492
	1.8049	276.75	0.4415		3.1224	1555	0.60577		1.8049	92.106	0.15285
	2.3786	305.84	0.91523		4.3053	1991.9	0.65747		2.3786	120.42	0.18703
	3.1224	451.3	1.5914		5.7043	2119	0.91265		3.1224	132.76	0.39537
	4.3053	458.58	0.79434		7.3322	2428.9	0.93157		4.3053	125.18	0.4004
	5.7043	626.29	1.2481		8.747	2375.5	0.33665		5.7043	130.55	0.72375
	7.3322	606.68	1.0367		9.74	2922.2	1		7.3322	138.45	1.0152
	8.747	865.72	1.601		1.0369	-122.34	0.37958		8.747	136.38	1.089
	9.74	1310.2	1		1.1152	-212.28	0.32748		9.74	184.73	1
	1.0369	155.54	0.19116		1.4002	-170.33	0.31572		1.0369	244.63	0.5148
	1.1152	177.78	0.26098		1.8049	-187.37	0.43852		1.1152	181.35	0.50769
	1.4002	129.43	0.29589		2.3786	-145.1	0.55225		1.4002	193.16	0.59996
	1.8049	131.98	0.19255		3.1224	-123.57	0.40653		1.8049	176.71	0.61469
	2.3786	153.82	0.24789		4.3053	-96.594	0.51513		2.3786	191.78	0.52104
	3.1224	158.78	0.27275		5.7043	-40.803	0.18469		3.1224	256.22	0.47075
	4.3053	323.33	0.58002		7.3322	-129.61	0.54732		4.3053	395.36	0.72417
	5.7043	327.61	0.9512		8.747	-90.798	0.42357		5.7043	460.3	0.74637
	7.3322	383.05	1.0557		9.74	-93.758	1		7.3322	532.32	0.60911
	8.747	481.29	1.0198		1.0369	224.23	-0.1771		8.747	592.31	0.89359
	9.74	450.84	1		1.1152	289.64	-0.33671		9.74	594.63	1
	1.0369	-27.551	0.52047		1.4002	277.66	0.0084286		1.0369	2.2825	0.34522
	1.1152	10.788	0.31361		1.8049	295.67	-0.048506		1.1152	6.7373	0.21129
	1.4002	-28.643	0.71523		2.3786	247.81	-0.026066		1.4002	21.705	0.363
	1.8049	-4.6885	0.42892		3.1224	288.53	0.1276		1.8049	24.557	0.33136
	2.3786	27.263	0.31454		4.3053	454.36	0.31182		2.3786	46.14	0.246
	3.1224	-3.6577	0.45104		5.7043	515.2	0.41613		3.1224	85.561	0.56314
	4.3053	16.26	0.51581		7.3322	596.83	0.50335		4.3053	151.93	0.55482
	5.7043	-4.265	0.86427		8.747	598.06	0.75805		5.7043	187.25	0.52403
	7.3322	12.714	0.47277		9.74	623.07	1		7.3322	209.04	0.68787
	8.747	81.373	0.67174		1.0369	416.73	0.79612		8.747	202.13	0.68242
	9.74	36.919	1		1.1152	467.58	0.56472		9.74	196.46	1
	1.0369	108.24	0.29428		1.4002	543.32	0.92008		1.0369	-59.152	0.5223
	1.1152	114.3	0.30346		1.8049	535.17	0.67811		1.1152	-79.913	0.81925
	1.4002	164.39	0.32561		2.3786	495.13	0.90598		1.4002	-86.059	0.64084
	1.8049	209.45	0.28554		3.1224	604.6	0.64727		1.8049	-78.067	0.95842
	2.3786	218.74	0.21775		4.3053	766.52	0.83721		2.3786	-91.073	1.366
	3.1224	254.7	0.42689		5.7043	773.68	0.78889		3.1224	-81.006	0.09394
	4.3053	272.27	0.45946		7.3322	982.52	0.68192		4.3053	-64.986	0.6325
	5.7043	357.73	0.65791		8.747	1017	0.81475		5.7043	-23.11	1.7379
	7.3322	423.6	0.73261		9.74	1109.2	1		7.3322	-65.407	1.9455
	8.747	547.57	0.86625		1.0369	455.13	0.1154		8.747	-62.602	1.5241
	9.74	603.73	1		1.1152	379.68	0.13006		9.74	-5.0064	1
	1.0369	-2.1421	0.12551		1.4002	520	0.5735		1.0369	35.958	0.047577
	1.1152	-0.79719	0.12522		1.8049	497.22	0.31007		1.1152	60.656	-0.014943
	1.4002	20.521	0.1199		2.3786	302.06	0.27404		1.4002	39.288	-0.091888
	1.8049	6.4411	0.41306		3.1224	421.94	0.20933		1.8049	61.534	-0.016198
	2.3786	5.8079	0.13238		4.3053	676.1	0.42553		2.3786	120.26	0.12749
	3.1224	5.3701	0.13483		5.7043	653.36	0.66241		3.1224	114.69	0.14699
	4.3053	75.748	0.48589		7.3322	819.31	0.65506		4.3053	162.72	0.73176
	5.7043	77.07	0.61032		8.747	797.36	0.81322		5.7043	189.73	0.61142
	7.3322	71.211	0.77178		9.74	810.49	1		7.3322	239.35	0.97839
	8.747	102.56	0.66607		1.0369	-187.24	0.37979		8.747	295.86	0.78843
	9.74	41.307	1		1.1152	-127.39	0.070005		9.74	283.6	1
	1.0369	107.14	0.13867		1.4002	-317.05	0.061578		1.0369	190.88	0.26399
	1.1152	60.312	0.030037		1.8049	-319.61	0.13712		1.1152	196.65	0.080081
	1.4002	100.02	0.13921		2.3786	-385.83	0.14664		1.4002	206.35	0.12941
	1.8049	107.58	0.051969		3.1224	-329.83	0.082401		1.8049	176.08	0.18216
	2.3786	128.47	0.087409		4.3053	-271.14	0.91759		2.3786	228.95	0.28672
	3.1224	155.78	0.23221		5.7043	-259.42	1.1608		3.1224	212.72	0.28357
	4.3053	265.49	0.40321		7.3322	-337.17	1.2961		4.3053	377.29	0.45355
	5.7043	378.72	0.97274		8.747	-266.44	1.0077		5.7043	370.79	0.76557
	7.3322	292.67	0.98712		9.74	-194.03	1		7.3322	458.7	1.0036
	8.747	403.3	0.91262		1.0369	-36.148	1.4058		8.747	503.91	1.391
	9.74	474.35	1		1.1152	-116.7	0.55033		9.74	466.71	1
	1.0369	95.093	0.087042		1.4002	-271.68	1.0123		1.0369	1145.3	0.53712
	1.1152	89.975	-0.1354		1.8049	-220.42	0.93575		1.1152	1218	0.58465
	1.4002	86.521	0.24762		2.3786	-292.59	1.0154		1.4002	1310.9	0.44077
	1.8049	29.168	0.076187		3.1224	-186.55	1.3318		1.8049	1513.5	0.65543
	2.3786	51.159	0.3306		4.3053	64.397	1.2196		2.3786	1561.7	0.76888
	3.1224	33.288	0.070486		5.7043	-165.77	1.6949		3.1224	1799.9	0.54152
	4.3053	219.04	0.33923		7.3322	-89.162	3.2318		4.3053	1555.1	0.43046
	5.7043	192.76	0.60991		8.747	-103.55	2.0609		5.7043	1703.7	0.19539
	7.3322	305.66	0.99741		9.74	-89.347	1		7.3322	2179.9	0.062692
	8.747	178.66	0.67892		1.0369	18.143	0.19791		8.747	2578.5	0.52207
	9.74	198.9	1		1.1152	108.48	0.18551		9.74	2709.7	1
	1.0369	-0.11517	0.2106		1.4002	232.96	0.19693		1.0369	-52.187	0.16054
	1.1152	10.341	0.20159		1.8049	246.43	0.28433		1.1152	-103.23	0.031522
	1.4002	35.422	0.22712		2.3786	165.05	0.017007		1.4002	-182.97	0.078096
	1.8049	50.133	0.21561		3.1224	227.53	0.13335		1.8049	-216.31	0.087984
	2.3786	52.703	0.18516		4.3053	108.84	0.33342		2.3786	-156.73	0.11983
	3.1224	55.725	0.13961		5.7043	134.36	1.075		3.1224	-140.54	0.10921
	4.3053	83.373	0.227		7.3322	131.04	1.0688		4.3053	-23.596	0.24106
	5.7043	52.633	0.43552		8.747	126.58	3.0024		5.7043	-49.262	1.5941
	7.3322	153.5	0.64478		9.74	206.29	1		7.3322	-27.56	2.2271
	8.747	174.05	0.81133		1.0369	-175.77	0.29924		8.747	-22.669	2.1085
	9.74	148.82	1		1.1152	37.415	0.21554		9.74	-40.772	1
	1.0369	88.501	0.18737		1.4002	-101.56	0.45609		1.0369	11.853	0.15437
	1.1152	100.77	0.15338		1.8049	-40.786	0.30089		1.1152	38.79	0.14627
	1.4002	90.726	0.082779		2.3786	-90.895	0.21516		1.4002	-9.6033	0.095704
	1.8049	105.78	0.09855		3.1224	-66.733	0.34638		1.8049	-23.87	0.083929
	2.3786	85.602	0.084276		4.3053	-190.34	0.728		2.3786	10.779	0.13561
	3.1224	111.03	0.11951		5.7043	-4.8128	1.4224		3.1224	70.142	0.13118
	4.3053	243.81	0.21352		7.3322	25.865	1.2702		4.3053	61.475	0.18563
	5.7043	222.13	0.67266		8.747	106.22	1.0445		5.7043	142.91	0.5194
	7.3322	259.36	0.91538		9.74	54.92	1		7.3322	161.22	0.78537
	8.747	320.79	0.97974		1.0369	328.66	0.66487		8.747	149.41	1.0468
	9.74	342.21	1		1.1152	372.18	0.4247		9.74	157.53	1
	1.0369	353.68	0.20061		1.4002	432.29	0.85078		1.0369	41.597	0.01392
	1.1152	364.7	0.30891		1.8049	407.46	0.92549		1.1152	-11.329	0.0068155
	1.4002	344.44	0.27166		2.3786	434.45	0.5446		1.4002	51.659	0.085978
	1.8049	359.58	0.37474		3.1224	512.62	0.59124		1.8049	77.486	0.37938
	2.3786	418.3	0.26286		4.3053	454.78	0.63327		2.3786	150.84	-0.033285
	3.1224	434.79	0.26009		5.7043	482.11	0.89489		3.1224	155.24	0.30931
	4.3053	509.49	0.47014		7.3322	582.26	0.97408		4.3053	107.69	0.13522
	5.7043	734.95	0.67353		8.747	557.13	1.2616		5.7043	270.78	0.55565
	7.3322	852.34	0.53394		9.74	613.99	1		7.3322	254.62	0.75829
	8.747	995.99	0.67405		1.0369	-41.545	0.077605		8.747	212.48	0.89235
	9.74	1177.9	1		1.1152	-86.737	-0.029177		9.74	258.91	1
	1.0369	154.19	0.17135		1.4002	34.238	0.038743		1.0369	188.51	-1.1199
	1.1152	143.7	0.1876		1.8049	-17.472	0.064861		1.1152	247.3	0.94869
	1.4002	131.97	0.21322		2.3786	-179.15	0.0045221		1.4002	204.84	1.154
	1.8049	143.84	0.17975		3.1224	0.039851	0.032146		1.8049	199.22	0.95082
	2.3786	156.08	0.21724		4.3053	35.702	0.28018		2.3786	267.28	1.3109
	3.1224	187.41	0.15354		5.7043	-28.645	0.39487		3.1224	235.45	1.6636
	4.3053	197.93	0.38843		7.3322	-64.94	0.7028		4.3053	333.81	0.99165
	5.7043	312.03	0.90248		8.747	-22.538	0.70194		5.7043	356.92	1.5759
	7.3322	343.67	0.67623		9.74	24.862	1		7.3322	515.18	1.2116
	8.747	370.05	1.0124		1.0369	418.51	0.050049		8.747	496.67	0.79136
	9.74	344.72	1		1.1152	254.72	0.72249		9.74	613.98	1
	1.0369	13.975	0.5459		1.4002	262.47	0.84035		1.0369	56.855	0.086831
	1.1152	26.852	0.22756		1.8049	272.41	0.79344		1.1152	-11.624	0.092071
	1.4002	14.5	0.11596		2.3786	377.39	0.56285		1.4002	3.2153	0.082914
	1.8049	23.297	0.20576		3.1224	460.75	0.51566		1.8049	48.439	0.023951
	2.3786	27.823	0.27218		4.3053	506.97	0.87594		2.3786	98.528	0.078273
	3.1224	53.927	0.11146		5.7043	412.29	1.2221		3.1224	26.428	0.21713
	4.3053	87.475	0.21146		7.3322	538.36	0.74391		4.3053	-50.499	0.17154
	5.7043	119.18	0.48958		8.747	654.56	0.80625		5.7043	-22.785	0.46338
	7.3322	163.95	1.2522		9.74	973.6	1		7.3322	75.36	0.67642
	8.747	280.63	1.3899		1.0369	378.07	0.20687		8.747	30.342	0.7894
	9.74	230.07	1		1.1152	433.39	0.18367		9.74	37.585	1
	1.0369	41.363	0.078426		1.4002	253.21	-1.0895		1.0369	193.94	0.1182
	1.1152	29.739	0.059754		1.8049	-3.8993	0.4546		1.1152	218.93	0.087181
	1.4002	51.013	0.00091676		2.3786	39.371	0.0049012		1.4002	277.73	0.17089
	1.8049	46.23	0.0074791		3.1224	-65.067	-0.016717		1.8049	292.93	0.26046
	2.3786	43.897	0.072869		4.3053	278.46	3.399		2.3786	314.22	0.58988
	3.1224	51.873	0.061776		5.7043	399.06	8.0363		3.1224	378.19	0.1731
	4.3053	92.523	0.31265		7.3322	185.66	4.1704		4.3053	359.05	0.49328
	5.7043	160.32	0.61104		8.747	286.94	3.968		5.7043	430.94	0.76492
	7.3322	215.61	0.98993		9.74	172.34	1		7.3322	600.97	1.1769
	8.747	246.03	0.93347		1.0369	140.29	0.11564		8.747	547.67	1.0154
	9.74	211.39	1		1.1152	-59.387	0.26584		9.74	673.16	1
	1.0369	68.929	0.10923		1.4002	-107.4	0.047043		1.0369	204.54	0.48614
	1.1152	50.38	0.15623		1.8049	-100.8	0.19359		1.1152	182.89	0.45159
	1.4002	40.923	-0.0010555		2.3786	-82.739	0.099608		1.4002	208.27	0.23231
	1.8049	35.86	0.10174		3.1224	-66.771	0.24808		1.8049	320.46	0.3112
	2.3786	45.878	0.098399		4.3053	127.84	1.0981		2.3786	317.42	0.62925
	3.1224	60.122	0.11061		5.7043	30.916	0.72319		3.1224	216.31	0.46274
	4.3053	97.418	0.7784		7.3322	-40.335	0.97177		4.3053	334.5	0.36933
	5.7043	145.05	1.2414		8.747	7.014	0.5519		5.7043	499.44	0.73851
	7.3322	149.31	1.3071		9.74	68.192	1		7.3322	666.03	0.78429
	8.747	151.58	1.0369		1.0369	92.857	0.071971		8.747	745.74	0.91544
	9.74	145.85	1		1.1152	86.481	0.13011		9.74	710.16	1
	1.0369	46.563	0.081355		1.4002	58.642	0.12119		1.0369	1135.6	0.43234
	1.1152	-12.091	0.063239		1.8049	134.36	0.19595		1.1152	1006	-1.2622
	1.4002	-18.732	0.039379		2.3786	109.95	0.1476		1.4002	1006.4	-0.53476
	1.8049	-25.888	0.091187		3.1224	102	0.13505		1.8049	999.7	0.11945
	2.3786	1.4309	0.13668		4.3053	96.143	0.2394		2.3786	825.91	0.47477
	3.1224	-17.824	0.11626		5.7043	152.83	0.51631		3.1224	976.4	-0.039005
	4.3053	21.762	1.123		7.3322	176.9	0.91058		4.3053	1176.3	0.55771
	5.7043	31.628	1.4905		8.747	256.46	0.85164		5.7043	1340.7	-0.057748
	7.3322	67.277	1.2991		9.74	243.14	1		7.3322	1397.3	0.7472
	8.747	63.047	1.3723		1.0369	143.31	0.068709		8.747	1354.2	0.46704
	9.74	55.053	1		1.1152	118.19	0.082421		9.74	1596.5	1
	1.0369	22.045	0.45963		1.4002	82.483	-0.030356		1.0369	206.33	0.052392
	1.1152	62.745	0.28079		1.8049	128.89	0.15183		1.1152	199.86	0.094187
	1.4002	47.07	0.54733		2.3786	160.64	0.06314		1.4002	204.91	0.35233
	1.8049	52.607	0.51681		3.1224	140.05	0.16501		1.8049	200.92	0.66852
	2.3786	73.376	0.82794		4.3053	221.05	0.0093854		2.3786	161.81	0.31602
	3.1224	75.393	0.41217		5.7043	261.6	0.33012		3.1224	175.77	0.81554
	4.3053	128.6	0.66714		7.3322	273.53	0.32187		4.3053	361.63	0.27716
	5.7043	213.47	0.86284		8.747	336.46	1.1683		5.7043	332.16	0.78755
	7.3322	330.46	0.80543		9.74	326.84	1		7.3322	354.79	1.1454
	8.747	267.33	0.5741		1.0369	51.906	0.42746		8.747	352.17	1.0419
	9.74	450.86	1		1.1152	74.907	0.3545		9.74	301.89	1
	1.0369	116.75	0.44825		1.4002	73.839	0.3066		1.0369	235.94	0.56764
	1.1152	101.23	0.59951		1.8049	56.004	0.5188		1.1152	172.68	0.040338
	1.4002	168.06	0.56069		2.3786	101.67	0.54004		1.4002	228.07	-0.04364
	1.8049	123.14	1.0019		3.1224	41.025	0.56205		1.8049	320.32	0.6956
	2.3786	151.04	0.76188		4.3053	196.62	0.83981		2.3786	318.69	0.3041
	3.1224	198.75	0.5483		5.7043	193.42	0.94903		3.1224	336.99	0.64548
	4.3053	216.71	0.58638		7.3322	223.56	0.93038		4.3053	407.77	0.43349
	5.7043	304.46	0.66928		8.747	181.71	0.85489		5.7043	497.54	0.86354
	7.3322	387.64	0.76286		9.74	225.46	1		7.3322	639.51	1.0742
	8.747	494.33	0.8338		1.0369	135.51	0.49362		8.747	644.55	1.0697
	9.74	524.61	1		1.1152	173.71	0.59832		9.74	735.33	1
	1.0369	97.275	0.26664		1.4002	240.27	0.43193		1.0369	-159.07	-0.17218
	1.1152	74.401	0.45963		1.8049	243.3	0.64012		1.1152	-165.99	0.15916
	1.4002	65.623	0.43966		2.3786	282.18	0.33842		1.4002	-194.56	0.41653
	1.8049	78.731	0.26568		3.1224	314.18	0.27201		1.8049	-161.18	0.15985
	2.3786	80.155	0.3103		4.3053	376.92	0.53008		2.3786	-98.987	0.13796
	3.1224	83.502	0.40631		5.7043	456.83	0.97423		3.1224	-125.8	0.059545
	4.3053	168.15	0.46557		7.3322	512.25	0.65072		4.3053	-41.85	0.36568
	5.7043	163.71	1.2035		8.747	688	0.9615		5.7043	-82.37	1.0673
	7.3322	231.54	0.71625		9.74	658.08	1		7.3322	-56.423	1.2354
	8.747	271.7	0.6162		1.0369	-234.06	0.4916		8.747	-62.529	1.0888
	9.74	287.49	1		1.1152	-128.25	0.3172		9.74	-14.099	1
	1.0369	119.21	0.448		1.4002	-129.16	0.4029		1.0369	-57.542	0.10379
	1.1152	98.996	0.45366		1.8049	-168.13	0.55937		1.1152	-56.29	-0.14615
	1.4002	111.07	0.32641		2.3786	-334.09	0.38289		1.4002	-49.772	0.036945
	1.8049	113.59	-0.14865		3.1224	-333.83	0.22537		1.8049	-74.589	-0.020634
	2.3786	182.09	0.55678		4.3053	73.69	0.61258		2.3786	-21.317	0.11405
	3.1224	245.32	0.56087		5.7043	-18.737	0.5639		3.1224	-48.619	0.013487
	4.3053	176.44	0.48397		7.3322	-141.65	0.75027		4.3053	-12.918	0.5491
	5.7043	290.97	0.54056		8.747	-52.904	1.2419		5.7043	-59.167	0.76055
	7.3322	472.41	0.56414		9.74	-199.72	1		7.3322	-13.667	0.93915
	8.747	856.64	0.97649		1.0369	1.3764	0.20463		8.747	-41.64	0.89965
	9.74	608.63	1		1.1152	49.156	0.28259		9.74	-40.091	1
	1.0369	3.135	-0.042783		1.4002	165.65	0.39355		1.0369	211.99	0.19389
	1.1152	-5.0216	0.021726		1.8049	232.41	0.35317		1.1152	232.65	0.093367
	1.4002	-11.112	0.030315		2.3786	129.4	0.32987		1.4002	279.56	0.1686
	1.8049	-11.359	0.064778		3.1224	256.48	0.14239		1.8049	341.85	0.12432
	2.3786	2.7384	0.053765		4.3053	156.62	0.9072		2.3786	354.37	0.29291
	3.1224	12.539	0.12744		5.7043	283.08	1.0492		3.1224	304.92	0.19875
	4.3053	38.902	1.0202		7.3322	287.1	0.99575		4.3053	427	0.24769
	5.7043	55.782	1.1851		8.747	254.89	0.7007		5.7043	457.82	0.70881
	7.3322	67.461	1.2132		9.74	147.45	1		7.3322	586.92	0.79253
	8.747	76.65	1.1475		1.0369	27.274	0.20699		8.747	592.47	0.92502
	9.74	96.594	1		1.1152	-24.024	0.43821		9.74	765.74	1
	1.0369	72.374	0.35866		1.4002	148.51	0.2253		1.0369	121.93	0.14768
	1.1152	86.734	0.42625		1.8049	149.77	0.21384		1.1152	93.982	0.037513
	1.4002	102.57	0.33159		2.3786	88.801	0.36456		1.4002	121.13	0.10143
	1.8049	72.087	0.36742		3.1224	141.15	0.26956		1.8049	149.59	0.30276
	2.3786	96.427	0.26234		4.3053	248.16	0.85887		2.3786	119.29	0.10673
	3.1224	98.922	0.33061		5.7043	310.55	1.1595		3.1224	111.02	0.38957
	4.3053	169.18	0.49242		7.3322	308.07	1.2121		4.3053	262.21	0.14909
	5.7043	220.45	0.94284		8.747	376.36	1.0561		5.7043	273.57	0.47555
	7.3322	334.18	1.063		9.74	276.77	1		7.3322	354.41	0.78158
	8.747	397.87	0.98698		1.0369	-4.2677	0.53584		8.747	284.58	1.1476
	9.74	470.71	1		1.1152	17.009	0.40189		9.74	349.53	1
	1.0369	28.831	0.32631		1.4002	-91.357	0.56369		1.0369	-25.29	-0.022758
	1.1152	62.084	0.39325		1.8049	-104.03	0.4093		1.1152	-9.7285	-0.068499
	1.4002	53.072	0.14385		2.3786	-98.377	0.39462		1.4002	-5.742	0.13575
	1.8049	71.94	-0.062792		3.1224	-16.389	0.22444		1.8049	2.9676	0.27593
	2.3786	69.401	0.46484		4.3053	-10.222	0.44906		2.3786	-17.499	0.17732
	3.1224	68.976	0.42607		5.7043	12.578	0.7378		3.1224	32.5	0.12192
	4.3053	189.94	0.63075		7.3322	-67.044	1.0227		4.3053	71.202	0.091196
	5.7043	186.69	0.81257		8.747	92.036	0.65833		5.7043	121.59	0.46403
	7.3322	242.94	1.0549		9.74	111.82	1		7.3322	105	0.62868
	8.747	320.74	1.0638		1.0369	620.16	1.3239		8.747	86.828	0.86339
	9.74	353.23	1		1.1152	634.89	0.30766		9.74	122.96	1
	1.0369	74.524	0.26771		1.4002	625.11	0.37919		1.0369	214.82	0.019312
	1.1152	63.036	0.21653		1.8049	695.83	1.1318		1.1152	188.69	-0.065104
	1.4002	58.341	0.11358		2.3786	650.92	1.0257		1.4002	243.32	0.0021692
	1.8049	44.026	0.16028		3.1224	820.76	1.2321		1.8049	235.83	-0.0041184
	2.3786	61.5	0.17485		4.3053	819.19	0.55015		2.3786	253.47	0.29457
	3.1224	47.956	0.18305		5.7043	965.83	1.1465		3.1224	357.66	0.13072
	4.3053	141.87	0.83223		7.3322	988.69	1.1752		4.3053	379.44	0.17661
	5.7043	146.98	1.1944		8.747	1054	0.95998		5.7043	402.16	0.49204
	7.3322	167.06	1.0591		9.74	1177.9	1		7.3322	516.93	0.6373
	8.747	215.72	1.0746		1.0369	420.65	0.98942		8.747	654.16	0.87808
	9.74	224.82	1		1.1152	455.15	0.88775		9.74	579.12	1
	1.0369	24.051	0.3999		1.4002	565.6	1.0148		1.0369	212.81	0.39734
	1.1152	9.4911	0.24242		1.8049	588.01	0.78127		1.1152	223.91	0.46416
	1.4002	-9.4152	0.19996		2.3786	616.04	0.61923		1.4002	162.55	0.4903
	1.8049	0.63943	0.36411		3.1224	537.43	0.52099		1.8049	177.19	0.42935
	2.3786	3.9636	0.41968		4.3053	824.49	1.153		2.3786	181.14	0.74051
	3.1224	7.7193	0.32207		5.7043	980.09	1.091		3.1224	228.28	0.95988
	4.3053	54.128	0.44007		7.3322	1058.9	0.85882		4.3053	399.13	0.60124
	5.7043	103.02	0.17296		8.747	1185.8	1.2319		5.7043	448.21	0.73522
	7.3322	100.74	1.0423		9.74	1102.8	1		7.3322	548.42	0.81266
	8.747	187.82	0.62214		1.0369	178.51	0.51667		8.747	600.96	0.4017
	9.74	187.3	1		1.1152	175.81	0.4936		9.74	479.03	1
	1.0369	56.241	0.14731		1.4002	332.78	0.35014		1.0369	21.269	0.28271
	1.1152	56.505	0.081559		1.8049	438.57	0.33335		1.1152	-11.923	0.30338
	1.4002	42.281	-0.005101		2.3786	344.91	0.47041		1.4002	-4.9922	0.273
	1.8049	47.16	-0.052963		3.1224	306.18	0.14425		1.8049	30.049	0.18785
	2.3786	45.471	-0.028681		4.3053	460.71	0.53431		2.3786	28.921	0.21225
	3.1224	52.836	0.024653		5.7043	369.07	0.74501		3.1224	34.515	0.48456
	4.3053	117.51	0.43703		7.3322	520.57	0.80187		4.3053	109.39	0.51826
	5.7043	131.73	0.90795		8.747	357.57	0.92691		5.7043	117.21	0.7006
	7.3322	156.35	1.1125		9.74	319.69	1		7.3322	185.91	0.86572
	8.747	176.58	1.125		1.0369	71.523	0.15576		8.747	185.56	0.57491
	9.74	217.36	1		1.1152	59.623	-0.095173		9.74	169.5	1
	1.0369	7.6018	0.15538		1.4002	-19.588	-0.08326		1.0369	437.35	0.37545
	1.1152	-1.6408	0.0097111		1.8049	72.694	0.24213		1.1152	459.93	0.038868
	1.4002	-4.1306	0.02002		2.3786	46.262	0.053133		1.4002	337.54	0.40049
	1.8049	-4.9548	0.018351		3.1224	-159.5	0.038871		1.8049	327.03	0.042097
	2.3786	9.6371	0.0079086		4.3053	149.85	0.11899		2.3786	374.11	0.26348
	3.1224	23.035	0.10401		5.7043	123.93	0.34966		3.1224	400.03	0.21531
	4.3053	28.124	0.40129		7.3322	73.639	0.46995		4.3053	518.46	0.061322
	5.7043	34.801	0.83311		8.747	88.69	0.52988		5.7043	549.57	0.28586
	7.3322	35.997	0.83513		9.74	41.854	1		7.3322	795.5	0.75062
	8.747	31.303	0.83713		1.0369	161.1	0.39474		8.747	839.65	0.83613
	9.74	50.043	1		1.1152	172.13	0.49997		9.74	924.56	1
	1.0369	92.938	0.09042		1.4002	137.45	0.49952		1.0369	11.97	0.12863
	1.1152	89.169	0.14596		1.8049	134.96	0.68939		1.1152	45.344	0.047732
	1.4002	117.03	0.061609		2.3786	219.42	0.47308		1.4002	75.815	-0.092897
	1.8049	98.181	0.0077601		3.1224	199.34	0.3714		1.8049	65.362	0.021738
	2.3786	84.382	0.011337		4.3053	245.99	0.52174		2.3786	59.937	0.089545
	3.1224	95.253	0.16679		5.7043	242.88	0.59133		3.1224	111.77	0.068735
	4.3053	230.73	0.53888		7.3322	291.67	1.0225		4.3053	53.103	0.34324
	5.7043	300.9	0.50109		8.747	352.39	0.66231		5.7043	122.14	0.16106
	7.3322	369.48	0.51139		9.74	382.21	1		7.3322	83.568	0.81892
	8.747	403.18	1.0562		1.0369	540.1	0.71774		8.747	127.98	0.50799
	9.74	380.52	1		1.1152	453.79	0.86663		9.74	141.04	1
	1.0369	21.737	0.28145		1.4002	382.06	0.91272		1.0369	222.63	0.35419
	1.1152	18.238	0.30572		1.8049	396.26	0.79018		1.1152	258.53	0.14616
	1.4002	23.538	0.3411		2.3786	410.96	0.97348		1.4002	256.97	0.23435
	1.8049	39.691	0.34488		3.1224	540.93	0.69785		1.8049	275.13	0.25828
	2.3786	43.935	0.43282		4.3053	668.97	0.7523		2.3786	363.06	0.23438
	3.1224	59.888	0.5206		5.7043	747.28	1.028		3.1224	376.55	0.22224
	4.3053	108.85	0.84713		7.3322	845.28	0.90656		4.3053	360.86	0.40064
	5.7043	157.42	0.88263		8.747	878.57	0.89243		5.7043	515.82	0.76436
	7.3322	199.83	0.91909		9.74	917.16	1		7.3322	623.96	0.82403
	8.747	289.39	0.76684		1.0369	584.73	0.69199		8.747	770.07	1.0018
	9.74	303.22	1		1.1152	444.94	-0.14799		9.74	1025.5	1
	1.0369	92.413	0.7043		1.4002	519.38	0.16827		1.0369	831.31	0.024698
	1.1152	80.25	0.58984		1.8049	497.37	0.28041		1.1152	783.26	-0.2269
	1.4002	78.411	0.56899		2.3786	539.44	0.30739		1.4002	790.92	0.21772
	1.8049	140.69	0.52632		3.1224	630.32	0.31346		1.8049	1101.8	0.153
	2.3786	133.17	0.60738		4.3053	720.6	0.36823		2.3786	1144.1	0.34004
	3.1224	154.66	0.69884		5.7043	865.39	0.65807		3.1224	1446.6	0.20956
	4.3053	204.16	0.51599		7.3322	764.9	0.82168		4.3053	935.67	0.059239
	5.7043	302.49	0.60725		8.747	799.77	0.79982		5.7043	1034.9	0.32623
	7.3322	408.8	1.0278		9.74	914.11	1		7.3322	1405.3	0.57495
	8.747	557.4	0.8343		1.0369	161.99	0.23958		8.747	1363.2	0.44624
	9.74	548.33	1		1.1152	-49.18	0.33265		9.74	1955.8	1
	1.0369	12.114	0.26888		1.4002	22.8	0.67419		1.0369	76.894	0.21183
	1.1152	21.303	0.27102		1.8049	91.707	0.19259		1.1152	64.685	0.12568
	1.4002	-18.071	0.2589		2.3786	126.99	0.32821		1.4002	50.407	0.30183
	1.8049	-7.7988	0.10048		3.1224	137.66	0.04035		1.8049	32.821	0.19986
	2.3786	-0.10206	0.26986		4.3053	119.31	0.3013		2.3786	8.7498	0.3686
	3.1224	32.753	0.39841		5.7043	318.38	0.57832		3.1224	29.14	0.56899
	4.3053	85.634	0.53367		7.3322	330.59	1.0598		4.3053	76.372	1.191
	5.7043	108.01	1.0447		8.747	205.09	0.85978		5.7043	82.284	1.483
	7.3322	142.69	1.1178		9.74	296.57	1		7.3322	50.461	1.2095
	8.747	150.16	1.2444		1.0369	129.51	0.33087		8.747	86.07	1.0637
	9.74	147.18	1		1.1152	9.9697	0.28641		9.74	63.787	1
	1.0369	-39.375	0.12116		1.4002	-102.33	0.25307		1.0369	45.43	0.091535
	1.1152	-8.1342	0.13892		1.8049	5.9614	0.3142		1.1152	-5.5701	0.017956
	1.4002	-28.574	-0.033645		2.3786	68.575	0.31022		1.4002	-34.3	0.077273
	1.8049	-39.79	0.020138		3.1224	37.338	0.44874		1.8049	-13.421	0.065512
	2.3786	-17.395	0.30393		4.3053	74.587	0.5681		2.3786	-35.506	0.0095306
	3.1224	-7.4513	0.6835		5.7043	145.72	0.88007		3.1224	15.614	1.1875
	4.3053	12.34	0.96348		7.3322	127.4	0.81074		4.3053	44.36	0.96594
	5.7043	26.441	1.4601		8.747	196.22	0.97905		5.7043	42.529	2.1156
	7.3322	16.85	1.4305		9.74	139.59	1		7.3322	49.01	1.8248
	8.747	21.224	1.2258		1.0369	308.86	1.2015		8.747	42.362	1.9083
	9.74	22.2	1		1.1152	265.15	0.86702		9.74	47.49	1
	1.0369	9.7587	0.083515		1.4002	249.78	1.2089		1.0369	85.672	-0.0079665
	1.1152	23.929	0.059161		1.8049	297.5	1.0834		1.1152	52.58	-0.042334
	1.4002	20.87	0.03575		2.3786	303.47	1.0923		1.4002	49.44	0.0021824
	1.8049	16.802	0.058906		3.1224	418.59	0.84472		1.8049	66.078	0.16039
	2.3786	11.579	0.18208		4.3053	470.09	2.1248		2.3786	106.03	0.06476
	3.1224	3.6145	0.29255		5.7043	495.21	2.9155		3.1224	84.635	0.14701
	4.3053	60.888	0.42304		7.3322	494.24	1.4767		4.3053	146.1	0.20518
	5.7043	74.362	0.71892		8.747	546.12	3.4472		5.7043	167	0.33071
	7.3322	77.978	0.85934		9.74	529.2	1		7.3322	186.66	0.60611
	8.747	79.638	0.98355		1.0369	790.06	0.95605		8.747	230.43	0.8353
	9.74	100.46	1		1.1152	671.48	0.89894		9.74	222.89	1
	1.0369	36.895	-0.034077		1.4002	751.75	1.2583		1.0369	72.307	0.14814
	1.1152	16.743	0.011334		1.8049	642.59	1.2645		1.1152	39.169	0.027433
	1.4002	61.982	-0.043292		2.3786	682.14	1.039		1.4002	63.919	0.24507
	1.8049	70.734	0.10374		3.1224	619.56	0.71218		1.8049	78.94	0.15758
	2.3786	58.023	0.13707		4.3053	1027.2	1.3251		2.3786	82.877	0.10787
	3.1224	92.615	0.2603		5.7043	1116.1	0.98921		3.1224	86.748	0.16774
	4.3053	119.25	0.41775		7.3322	1208.9	1.4648		4.3053	92.872	0.67649
	5.7043	116.71	0.68946		8.747	1337.1	1.3652		5.7043	105.77	0.8946
	7.3322	192.27	0.76636		9.74	1334	1		7.3322	118.01	0.73169
	8.747	190.65	0.67849		1.0369	269.08	0.10528		8.747	119.53	1.2324
	9.74	276.01	1		1.1152	98.032	0.17191		9.74	116.8	1
	1.0369	15.391	0.18807		1.4002	59.047	0.12027		1.0369	-46.278	0.18837
	1.1152	-12.254	0.14108		1.8049	102.1	0.22156		1.1152	90.244	0.36968
	1.4002	-30.896	0.064279		2.3786	68.632	0.17866		1.4002	208.18	0.58655
	1.8049	-16.038	0.098529		3.1224	62.667	0.23656		1.8049	252.9	0.63178
	2.3786	-6.6449	0.12988		4.3053	193.29	0.73062		2.3786	313.49	0.31889
	3.1224	-22.95	0.19479		5.7043	192.64	0.93569		3.1224	314.99	0.35407
	4.3053	2.9053	0.6891		7.3322	160.13	1.4459		4.3053	406.4	0.94614
	5.7043	4.4633	1.0514		8.747	203.5	1.1365		5.7043	543.95	0.57847
	7.3322	22.028	1.2556		9.74	204.65	1		7.3322	808.98	1.0753
	8.747	22.631	1.271		1.0369	0.99604	0.46531		8.747	1082	0.9071
	9.74	23.108	1		1.1152	77.292	-0.076253		9.74	1114.1	1
	1.0369	-6.8061	0.020803		1.4002	-6.386	0.026076		1.0369	-0.51153	0.1102
	1.1152	9.2058	0.0095466		1.8049	59.313	0.33404		1.1152	0.47215	0.18576
	1.4002	3.5715	0.0083841		2.3786	29.193	0.25128		1.4002	21.599	0.12528
	1.8049	2.8956	-0.039498		3.1224	4.2536	0.21209		1.8049	3.7828	0.087782
	2.3786	5.3411	0.080464		4.3053	21.825	1.8756		2.3786	0.80667	0.34183
	3.1224	9.5679	0.083449		5.7043	-19.559	1.7005		3.1224	6.503	0.19288
	4.3053	17.24	0.35086		7.3322	44.432	2.9906		4.3053	16.711	0.52457
	5.7043	54.68	0.51766		8.747	77.81	1.2706		5.7043	45.726	0.8213
	7.3322	61.358	0.578		9.74	65.949	1		7.3322	40.383	0.89397
	8.747	66.28	1.2549		1.0369	106.58	0.53764		8.747	32.669	1.0355
	9.74	67.364	1		1.1152	34.759	0.30961		9.74	40.53	1
	1.0369	80.963	0.21801		1.4002	69.252	0.38353		1.0369	-8.5304	0.051399
	1.1152	67.836	0.0609		1.8049	37.76	0.52345		1.1152	3.1121	0.020591
	1.4002	70.094	0.049973		2.3786	84.98	0.40257		1.4002	-6.6136	0.030499
	1.8049	67.186	0.036283		3.1224	32.545	0.35789		1.8049	-64.148	0.023718
	2.3786	61.249	0.017914		4.3053	170.6	0.70898		2.3786	-3.1361	0.10954
	3.1224	96.254	0.042566		5.7043	177.98	1.1334		3.1224	-66.808	-0.0047648
	4.3053	138.58	0.11437		7.3322	158.55	1.6326		4.3053	36.344	0.80733
	5.7043	169.45	0.53421		8.747	169.47	1.5326		5.7043	12.366	1.0202
	7.3322	251.3	0.85235		9.74	164.35	1		7.3322	-13.593	0.64922
	8.747	347.66	0.88928		1.0369	381.26	0.5642		8.747	42.062	0.78085
	9.74	299.86	1		1.1152	451.67	0.50527		9.74	42.646	1
	1.0369	-49.963	0.13672		1.4002	391.98	0.32703		1.0369	69.768	0.18108
	1.1152	-39.149	0.11146		1.8049	372.97	0.45072		1.1152	70.047	0.18869
	1.4002	-25.812	0.093772		2.3786	485.81	0.3911		1.4002	65.434	0.19114
	1.8049	-2.778	0.19985		3.1224	513.73	0.3618		1.8049	66.585	0.23018
	2.3786	-42.365	0.099267		4.3053	587.86	0.32195		2.3786	88.958	0.41968
	3.1224	-35.725	0.094705		5.7043	780.45	0.19217		3.1224	97.232	0.45156
	4.3053	-14.548	1.1256		7.3322	1009.8	0.41339		4.3053	120.28	0.55629
	5.7043	-7.1462	1.1538		8.747	1140.5	0.60019		5.7043	163.75	0.63
	7.3322	1.0805	1.3968		9.74	1078.2	1		7.3322	199.01	0.84792
	8.747	2.2643	1.7852		1.0369	180.01	0.32818		8.747	280.53	0.93199
	9.74	-24.742	1		1.1152	150.11	0.20743		9.74	331.53	1
	1.0369	112.18	-0.061124		1.4002	74.973	0.16251		1.0369	40.748	0.5805
	1.1152	122.7	0.023876		1.8049	64.436	0.16761		1.1152	19.354	0.062645
	1.4002	139.78	0.055336		2.3786	69.738	0.29938		1.4002	46.636	0.34161
	1.8049	118.91	0.0044856		3.1224	146.78	0.28025		1.8049	11.252	0.56262
	2.3786	115.45	-0.057174		4.3053	234.99	0.65218		2.3786	55.781	0.093887
	3.1224	160.97	0.048699		5.7043	295.17	0.86616		3.1224	65.935	0.673
	4.3053	245.05	0.11441		7.3322	336.93	1.1705		4.3053	114.84	0.41724
	5.7043	303.65	0.24986		8.747	344.05	0.97466		5.7043	135.3	0.87339
	7.3322	444.01	0.63867		9.74	271.15	1		7.3322	129.06	0.38722
	8.747	593.69	0.88839		1.0369	-6.1914	0.32173		8.747	172.19	1.311
	9.74	685.26	1		1.1152	-91.2	1.1036		9.74	181.3	1
	1.0369	16.637	0.21278		1.4002	-141.6	1.033		1.0369	132.4	0.30311
	1.1152	13.832	0.13378		1.8049	-21.801	0.76529		1.1152	170.76	0.15214
	1.4002	-5.0921	0.059814		2.3786	-35.068	0.6296		1.4002	167.05	-0.022621
	1.8049	11.867	0.095482		3.1224	76.835	0.46062		1.8049	178.5	0.14462
	2.3786	20.4	0.089738		4.3053	-48.019	0.8364		2.3786	210.15	0.36166
	3.1224	19.841	0.15481		5.7043	93.546	1.4372		3.1224	246.34	0.22078
	4.3053	34.635	0.39568		7.3322	104.08	0.92575		4.3053	264.52	0.37695
	5.7043	76.904	0.90629		8.747	175.29	0.90406		5.7043	329.82	0.41749
	7.3322	89.248	0.96913		9.74	236.14	1		7.3322	434.58	0.54622
	8.747	91.886	0.98582		1.0369	33.836	0.74453		8.747	531.71	0.85095
	9.74	130.76	1		1.1152	-122.45	0.36497		9.74	551.18	1
	1.0369	125.14	0.37318		1.4002	-169.15	0.24208		1.0369	207.29	0.59473
	1.1152	92.332	0.24599		1.8049	-85.728	0.31177		1.1152	199.27	0.4696
	1.4002	89.551	0.16484		2.3786	-107.29	0.41635		1.4002	167.15	0.56791
	1.8049	89.899	0.22499		3.1224	-143.36	0.21469		1.8049	213.5	0.49708
	2.3786	76.715	0.29922		4.3053	-195.03	0.59188		2.3786	264.78	0.50873
	3.1224	113.31	0.28162		5.7043	-84.258	1.3476		3.1224	307.45	0.26448
	4.3053	181.33	0.32973		7.3322	-138.18	1.4126		4.3053	364.93	0.49609
	5.7043	227.64	0.47193		8.747	-75.406	1.329		5.7043	441.32	0.65286
	7.3322	295.79	0.72215		9.74	-38.164	1		7.3322	476.66	0.73904
	8.747	351.12	0.74806		1.0369	197.83	0.49487		8.747	620.23	0.39655
	9.74	370.87	1		1.1152	218.62	0.52564		9.74	790.99	1
	1.0369	43.311	0.36873		1.4002	237.25	0.53874		1.0369	182.61	0.086162
	1.1152	57.576	0.26917		1.8049	261.45	0.55605		1.1152	140.66	0.043807
	1.4002	53.499	0.25568		2.3786	259.89	0.3979		1.4002	217.3	0.11888
	1.8049	63.496	0.1903		3.1224	311.35	0.59745		1.8049	239.78	0.086001
	2.3786	61.174	0.29801		4.3053	356.88	0.79278		2.3786	226.99	-0.06625
	3.1224	71.954	0.30947		5.7043	380.53	0.88907		3.1224	218.45	0.1775
	4.3053	109.3	0.25965		7.3322	484.05	0.6051		4.3053	257.36	0.33322
	5.7043	144.06	0.6159		8.747	526.81	0.98415		5.7043	352.1	0.29747
	7.3322	166.49	0.8078		9.74	566.86	1		7.3322	417.54	0.69932
	8.747	204.7	1.2352		1.0369	66.739	0.35335		8.747	385.26	0.60741
	9.74	248.01	1		1.1152	98.232	0.44178		9.74	414.06	1
	1.0369	35.063	0.31803		1.4002	78.215	0.49641		1.0369	12.519	0.20233
	1.1152	42.586	0.27389		1.8049	103.39	0.6251		1.1152	-25.664	0.071238
	1.4002	35.354	0.54127		2.3786	101.21	0.41716		1.4002	0.1438	0.14804
	1.8049	44.707	0.57871		3.1224	80.89	0.14383		1.8049	-17.182	0.20464
	2.3786	41.616	0.3637		4.3053	115.03	0.62028		2.3786	-46.792	0.25613
	3.1224	66.064	0.37782		5.7043	176.27	0.97392		3.1224	-11.624	0.25637
	4.3053	108.33	0.40699		7.3322	185.26	1.0598		4.3053	22.647	1.3293
	5.7043	134.66	0.5739		8.747	138.98	1.4828		5.7043	10.726	1.209
	7.3322	178.12	0.8121		9.74	85.184	1		7.3322	10.344	1.6399
	8.747	227.06	1.126		1.0369	117.35	0.12975		8.747	10.913	0.84919
	9.74	234.04	1		1.1152	103.97	-0.073753		9.74	31.837	1
	1.0369	-31.379	0.26317		1.4002	156.82	0.40934		1.0369	279.15	0.41644
	1.1152	-13.619	0.39248		1.8049	11.001	0.30434		1.1152	237.43	0.070551
	1.4002	-25.315	0.050925		2.3786	128.15	-0.00067988		1.4002	237.89	0.14816
	1.8049	-11.336	0.30779		3.1224	239.1	0.42131		1.8049	231.08	0.34206
	2.3786	-21.504	0.3278		4.3053	-63.902	0.44866		2.3786	339.58	0.27505
	3.1224	-1.0091	0.34412		5.7043	81.889	0.51087		3.1224	394.53	-0.25641
	4.3053	14.94	0.36487		7.3322	217.68	-0.062605		4.3053	486.6	0.080249
	5.7043	16.268	0.64928		8.747	288.02	0.59323		5.7043	515.02	0.37741
	7.3322	31.537	0.45699		9.74	403.17	1		7.3322	651.08	0.24988
	8.747	42.812	1.1419		1.0369	88.161	1.3725		8.747	722.71	0.44714
	9.74	51.552	1		1.1152	87.861	1.0126		9.74	1099.7	1
	1.0369	76.635	0.21265		1.4002	89.683	-0.39699		1.0369	78.3	0.24695
	1.1152	82.139	0.14868		1.8049	112.35	-0.052556		1.1152	53.461	0.11645
	1.4002	81.897	0.27716		2.3786	123.94	0.80554		1.4002	44.116	0.044506
	1.8049	85.761	0.23383		3.1224	126.28	0.76986		1.8049	51.367	0.26536
	2.3786	94.59	0.27733		4.3053	129.21	0.89606		2.3786	49.252	0.22397
	3.1224	126.02	0.29451		5.7043	173.27	0.81984		3.1224	78.181	0.20771
	4.3053	121.88	0.49363		7.3322	218.83	1.5695		4.3053	116.2	0.53086
	5.7043	167.77	0.65935		8.747	251.48	1.0369		5.7043	150.62	0.55992
	7.3322	194.37	0.96788		9.74	274.78	1		7.3322	157.07	0.71808
	8.747	221.72	0.89952		1.0369	31.405	1.2819		8.747	209.52	1.0353
	9.74	240.59	1		1.1152	25.665	0.7928		9.74	176.66	1
	1.0369	-40.562	0.38883		1.4002	39.991	1.8877		1.0369	241.32	0.08714
	1.1152	-51.131	0.50667		1.8049	43.448	1.0105		1.1152	224.9	0.1316
	1.4002	-19.854	0.30647		2.3786	56.571	0.82929		1.4002	236.63	0.23471
	1.8049	-56.894	0.90603		3.1224	54.774	1.1951		1.8049	226.38	0.18867
	2.3786	-44.636	0.53015		4.3053	82.685	0.83372		2.3786	237.04	0.18847
	3.1224	-8.0891	0.26112		5.7043	89.666	1.4838		3.1224	277.85	0.26827
	4.3053	-53.768	0.38712		7.3322	91.8	0.99133		4.3053	357.87	0.33738
	5.7043	-30.259	1.5336		8.747	115.39	1.9408		5.7043	423.97	0.39072
	7.3322	-14.832	1.1003		9.74	97.574	1		7.3322	502.71	0.52548
	8.747	-10.328	1.6044		1.0369	102.08	0.88904		8.747	534.22	0.84538
	9.74	-27.648	1		1.1152	121.89	0.92643		9.74	580.47	1
	1.0369	-1.8465	0.24665		1.4002	147.41	0.5878		1.0369	210.32	-0.11218
	1.1152	20.224	0.61483		1.8049	181.57	0.73547		1.1152	282.78	-0.09798
	1.4002	36.912	0.42708		2.3786	145.43	0.8816		1.4002	250.09	-0.16376
	1.8049	69.572	0.41794		3.1224	184.82	0.52066		1.8049	303.36	-0.13656
	2.3786	59.296	0.27259		4.3053	212.6	0.96764		2.3786	374.23	-0.1652
	3.1224	82.915	0.48522		5.7043	261.11	0.91131		3.1224	247.13	-0.22801
	4.3053	63.092	-0.15429		7.3322	312.21	0.94302		4.3053	378.73	-0.053223
	5.7043	108.01	0.40228		8.747	338.41	0.70877		5.7043	419.65	0.076615
	7.3322	123.95	0.77543		9.74	402	1		7.3322	588.98	0.17125
	8.747	179.06	0.92418		1.0369	23.178	0.33005		8.747	808.87	0.65226
	9.74	201.38	1		1.1152	16	0.26322		9.74	1049.8	1
	1.0369	-15.931	0.102		1.4002	18.964	0.26716		1.0369	91.312	0.074076
	1.1152	-48.021	0.041161		1.8049	45.795	0.37611		1.1152	93.521	0.00053312
	1.4002	-35.54	0.01908		2.3786	22.816	0.45089		1.4002	77.164	0.051641
	1.8049	-30.158	0.055429		3.1224	30.169	0.86863		1.8049	100.89	0.063999
	2.3786	-21.257	0.062914		4.3053	74.231	0.65196		2.3786	110.93	0.093991
	3.1224	18.881	0.016935		5.7043	81.415	0.80253		3.1224	79.101	0.14422
	4.3053	-0.70091	0.36238		7.3322	100.29	1.4076		4.3053	177.09	0.48744
	5.7043	13.342	0.43917		8.747	91.205	1.0656		5.7043	170.87	0.4467
	7.3322	25.351	0.81835		9.74	92.118	1		7.3322	190.74	0.679
	8.747	67.043	0.87826		1.0369	53.552	0.4227		8.747	166.18	0.84393
	9.74	69.988	1		1.1152	71.333	0.27746		9.74	201.98	1
	1.0369	-8.8341	0.36778		1.4002	79.102	-0.014371		1.0369	117.3	0.47026
	1.1152	4.1205	0.33049		1.8049	72.198	0.28073		1.1152	178.89	0.64333
	1.4002	0.7401	0.0726		2.3786	76.802	0.38971		1.4002	171.34	0.45625
	1.8049	11.873	0.44433		3.1224	75.937	0.24246		1.8049	178.83	0.50106
	2.3786	5.1492	0.2399		4.3053	92.674	0.071438		2.3786	181.1	0.42227
	3.1224	0.28204	0.35217		5.7043	136.03	0.86171		3.1224	222.63	0.26984
	4.3053	26.479	0.66298		7.3322	132.91	0.87434		4.3053	353.17	0.3897
	5.7043	50.605	0.63143		8.747	125.34	1.132		5.7043	376.16	0.47221
	7.3322	41.637	0.94709		9.74	158.89	1		7.3322	450.93	0.41211
	8.747	55.932	1.0601		1.0369	0.708	0.11578		8.747	830.88	0.83292
	9.74	75.054	1		1.1152	9.9046	0.10862		9.74	884.54	1
	1.0369	44.506	0.33287		1.4002	7.3729	0.071288		1.0369	126.48	0.25154
	1.1152	48.504	0.44788		1.8049	25.077	0.10721		1.1152	133.17	0.14201
	1.4002	52.672	0.38639		2.3786	-3.749	0.022393		1.4002	157.37	0.23319
	1.8049	35.594	0.32131		3.1224	-4.5748	0.10255		1.8049	199.73	0.25023
	2.3786	56.505	0.26852		4.3053	10.514	0.090051		2.3786	188.2	0.30246
	3.1224	83.86	0.42174		5.7043	28.103	0.79217		3.1224	199.81	0.23355
	4.3053	136.9	0.23679		7.3322	30.762	0.76159		4.3053	202.47	0.32617
	5.7043	149.94	0.30462		8.747	33.611	0.64175		5.7043	274.06	0.42043
	7.3322	191.86	0.61824		9.74	42.661	1		7.3322	337.19	0.57677
	8.747	210.26	0.8981		1.0369	-13.472	0.055416		8.747	381.39	0.72461
	9.74	253.82	1		1.1152	-21.018	0.16599		9.74	452.26	1
	1.0369	9.6327	0.17888		1.4002	-25.998	-0.0066441		1.0369	126.26	-0.78877
	1.1152	17.244	0.13576		1.8049	-11.481	0.31603		1.1152	129.89	0.12932
	1.4002	32.599	0.13836		2.3786	-2.6477	0.098929		1.4002	135.99	0.063726
	1.8049	29.31	0.25662		3.1224	-40.445	0.11566		1.8049	137.97	0.4003
	2.3786	47.67	0.1478		4.3053	-2.8163	0.30901		2.3786	168.92	0.22143
	3.1224	47.476	0.066313		5.7043	-5.7593	0.7511		3.1224	172.55	0.2996
	4.3053	16.482	0.26489		7.3322	4.8492	0.8192		4.3053	180.25	0.18293
	5.7043	69.046	0.5717		8.747	-7.3934	1.3141		5.7043	216.02	0.51803
	7.3322	88.105	0.89008		9.74	0.51028	1		7.3322	290.47	0.95002
	8.747	100.16	0.84203		1.0369	113.99	0.065035		8.747	337.55	0.84715
	9.74	85.775	1		1.1152	122.29	0.19138		9.74	433.46	1
	1.0369	49.49	0.19286		1.4002	106.71	0.1531		1.0369	24.593	0.020195
	1.1152	44.462	0.36162		1.8049	112.88	0.15174		1.1152	0.49575	0.082429
	1.4002	58.508	0.12474		2.3786	112.42	0.036394		1.4002	-9.0756	0.059796
	1.8049	43.138	0.29548		3.1224	85.974	0.37891		1.8049	-28.038	0.060726
	2.3786	51.804	0.11933		4.3053	175.55	-0.014516		2.3786	-37.882	0.11842
	3.1224	68.116	0.28596		5.7043	179.28	0.31807		3.1224	3.8606	0.18477
	4.3053	82.547	0.21015		7.3322	186.98	0.46168		4.3053	58.033	0.24863
	5.7043	125.43	0.44377		8.747	208.9	0.30199		5.7043	44.203	0.41658
	7.3322	135.61	0.73358		9.74	188.31	1		7.3322	21.952	0.59059
	8.747	182.56	0.96111		1.0369	51.932	0.8574		8.747	28.734	0.97269
	9.74	165.93	1		1.1152	67.46	0.39021		9.74	21.842	1
	1.0369	16.27	0.28816		1.4002	77.031	0.28087		1.0369	92.29	0.017875
	1.1152	7.4458	0.10103		1.8049	79.642	0.52754		1.1152	89.893	0.083547
	1.4002	0.93096	0.022923		2.3786	70.225	0.38551		1.4002	93.921	0.086614
	1.8049	1.0675	0.29591		3.1224	61.261	0.65849		1.8049	74.581	0.098863
	2.3786	-5.1816	0.11192		4.3053	125.8	0.83797		2.3786	86.381	0.16557
	3.1224	3.0079	0.13909		5.7043	165.33	0.038034		3.1224	118.48	0.17063
	4.3053	16.241	0.22437		7.3322	170.98	0.87474		4.3053	173.05	0.31929
	5.7043	21.53	0.67461		8.747	193.77	1.1351		5.7043	191.72	0.43326
	7.3322	30.661	0.73911		9.74	144.19	1		7.3322	230.43	0.59217
	8.747	27.06	0.92579		1.0369	116.12	0.43568		8.747	301.5	0.88588
	9.74	17.627	1		1.1152	115.03	0.3931		9.74	337.71	1
	1.0369	-44.23	0.28849		1.4002	111.51	0.53524		1.0369	45.182	-0.10567
	1.1152	-33.326	0.23522		1.8049	121.95	0.2818		1.1152	30.106	0.022612
	1.4002	-26.842	0.30439		2.3786	129.74	0.32684		1.4002	58.149	0.033481
	1.8049	-41.464	0.31346		3.1224	97.761	0.34929		1.8049	28.786	0.18959
	2.3786	-23.462	0.29779		4.3053	171.56	0.56301		2.3786	61.442	0.13196
	3.1224	-14.171	0.13114		5.7043	207.67	0.66515		3.1224	76.314	0.30187
	4.3053	-40.918	0.55113		7.3322	209.37	0.73262		4.3053	88.236	0.17368
	5.7043	-17.196	0.92925		8.747	232.52	0.78082		5.7043	86.463	0.58633
	7.3322	5.0438	1.0108		9.74	189.34	1		7.3322	141.45	1.3772
	8.747	19.911	1.0677		1.0369	87.159	0.17323		8.747	153.93	1.7096
	9.74	13.597	1		1.1152	87.555	0.11009		9.74	115.53	1
	1.0369	25.976	0.23003		1.4002	77.903	0.23649		1.0369	133.57	0.022681
	1.1152	34.438	0.25112		1.8049	87.634	0.082424		1.1152	128.62	0.080305
	1.4002	36.182	0.15119		2.3786	111.89	-0.14503		1.4002	94.578	0.12496
	1.8049	46.17	0.26305		3.1224	123.23	0.39637		1.8049	107.19	0.29625
	2.3786	57.306	0.20326		4.3053	97.278	0.26163		2.3786	129.02	0.42741
	3.1224	67.566	0.25981		5.7043	125.89	0.54068		3.1224	172.96	0.20393
	4.3053	97.662	0.3143		7.3322	140.6	0.72553		4.3053	129.04	0.46188
	5.7043	116.48	0.42259		8.747	132.28	0.75057		5.7043	210.3	0.30911
	7.3322	111.15	0.72318		9.74	144.09	1		7.3322	232.81	0.71844
	8.747	174.19	0.7812		1.0369	18.662	0.17079		8.747	283.72	1.036
	9.74	167.53	1		1.1152	1.6858	0.13762		9.74	391.01	1
	1.0369	13.485	0.13428		1.4002	13.428	-2.3121		1.0369	0.35557	0.22509
	1.1152	12.789	0.14083		1.8049	-15.757	0.59832		1.1152	28.155	0.02007
	1.4002	-23.609	0.1302		2.3786	-53.197	0.23381		1.4002	30.432	0.36634
	1.8049	-15.318	0.20183		3.1224	-17.33	0.51777		1.8049	39.824	0.25808
	2.3786	5.7036	0.16156		4.3053	4.3074	0.51812		2.3786	58.196	0.5426
	3.1224	6.0235	0.11142		5.7043	10.197	1.6822		3.1224	94.221	0.3462
	4.3053	-20.539	0.1042		7.3322	-4.7891	2.3125		4.3053	68.993	0.58625
	5.7043	-4.321	0.54977		8.747	7.2653	1.681		5.7043	101.48	0.33558
	7.3322	5.19	0.84004		9.74	9.9146	1		7.3322	158.53	0.55195
	8.747	33.51	1.0356		1.0369	8.2278	0.63357		8.747	170.57	0.95293
	9.74	20.527	1		1.1152	21.012	0.047214		9.74	303.35	1
	1.0369	184.77	0.32497		1.4002	2.7075	0.35133		1.0369	49.238	0.71709
	1.1152	191.64	0.35211		1.8049	48.287	0.57609		1.1152	62.42	0.96424
	1.4002	178.14	0.35386		2.3786	23.339	0.49815		1.4002	53.92	0.91739
	1.8049	185.43	0.51035		3.1224	38.479	0.33934		1.8049	72.723	0.85136
	2.3786	184.86	0.43536		4.3053	16.215	0.40919		2.3786	82.584	1.1731
	3.1224	210.81	0.55219		5.7043	28.878	0.79697		3.1224	91.387	1.1886
	4.3053	229.08	0.30457		7.3322	39.526	1.2588		4.3053	75.548	1.0093
	5.7043	277.16	0.38837		8.747	38.09	1.2718		5.7043	140.72	1.2589
	7.3322	388.48	0.48879		9.74	38.523	1		7.3322	184.85	1.2574
	8.747	427.02	0.7494		1.0369	-38.294	0.95379		8.747	182.7	1.2607
	9.74	455.94	1		1.1152	-29.675	1.0834		9.74	262.43	1
	1.0369	-12.521	0.23849		1.4002	-48.706	2.2156		1.0369	79.827	-0.0090787
	1.1152	-13.846	0.27728		1.8049	-32.182	1.0988		1.1152	20.828	0.078525
	1.4002	-17.427	0.29671		2.3786	-36.649	2.5882		1.4002	42.974	0.081447
	1.8049	-18.806	0.388		3.1224	-44.499	0.9467		1.8049	60.827	0.18404
	2.3786	-0.37961	0.31923		4.3053	-28.98	1.547		2.3786	84.977	0.14641
	3.1224	-16.433	0.3375		5.7043	-22.425	1.3472		3.1224	96.865	0.19109
	4.3053	24.505	0.31389		7.3322	-25.005	2.3318		4.3053	89.893	0.42611
	5.7043	35.979	0.4463		8.747	-10.371	0.81635		5.7043	81.612	0.74661
	7.3322	62.895	0.60752		9.74	-25.806	1		7.3322	142.83	1.0804
	8.747	60.269	0.79804		1.0369	34.835	0.28879		8.747	205.03	1.2429
	9.74	118.3	1		1.1152	33.265	0.33021		9.74	230.93	1
	1.0369	38.39	0.50793		1.4002	53.94	0.072308		1.0369	89.837	0.054485
	1.1152	39.671	0.32186		1.8049	78.897	0.33876		1.1152	70.456	0.16533
	1.4002	61.22	0.39817		2.3786	59.301	0.32189		1.4002	69.865	0.10534
	1.8049	63.413	0.47363		3.1224	61.331	0.74253		1.8049	62.508	-0.035068
	2.3786	88.354	0.44632		4.3053	36.808	0.43484		2.3786	48.877	0.21094
	3.1224	98.007	0.44164		5.7043	51.08	0.36501		3.1224	76.362	0.33526
	4.3053	110.63	0.44593		7.3322	51.4	0.71242		4.3053	120.9	0.64517
	5.7043	137.22	0.63113		8.747	61.683	0.80609		5.7043	133.79	0.93376
	7.3322	189.08	0.74297		9.74	79.19	1		7.3322	156.83	1.063
	8.747	261.6	0.89558		1.0369	25.701	0.065734		8.747	147.21	1.5264
	9.74	290.94	1		1.1152	-4.7638	0.13196		9.74	157.57	1
	1.0369	27.689	0.10835		1.4002	-4.397	0.33697		1.0369	20.455	0.021868
	1.1152	16.932	-0.016499		1.8049	4.8283	0.090184		1.1152	24.779	0.16413
	1.4002	30.896	-0.01303		2.3786	12.698	0.17523		1.4002	28.275	-0.02635
	1.8049	24.954	0.12786		3.1224	23.834	0.31074		1.8049	39.819	0.088211
	2.3786	16.937	0.16154		4.3053	14.196	0.27619		2.3786	28.825	0.12338
	3.1224	20.457	0.12423		5.7043	41.501	0.50622		3.1224	53.02	0.14169
	4.3053	36.529	0.17837		7.3322	48.89	0.55304		4.3053	87.669	0.30575
	5.7043	35.537	0.48029		8.747	59.451	0.70593		5.7043	111.14	0.40803
	7.3322	22.452	0.71176		9.74	65.033	1		7.3322	140.91	0.6317
	8.747	58.07	0.9653		1.0369	31.303	0.00014905		8.747	170.35	0.95784
	9.74	51.804	1		1.1152	21.399	0.034035		9.74	194.46	1
	1.0369	68.991	0.59781		1.4002	23.47	0.0032902		1.0369	17.986	-0.009324
	1.1152	92.66	0.60198		1.8049	35.391	0.048587		1.1152	29.521	0.12318
	1.4002	95.365	0.4761		2.3786	24.618	0.04319		1.4002	31.132	-0.02728
	1.8049	116.05	0.5491		3.1224	34.901	0.019861		1.8049	66.688	0.11713
	2.3786	125.52	0.49061		4.3053	36.609	0.056881		2.3786	92.261	0.32645
	3.1224	152.16	0.50622		5.7043	46.498	0.17121		3.1224	83.652	0.3465
	4.3053	128.73	0.47596		7.3322	60.064	0.34454		4.3053	106.52	0.41981
	5.7043	203.47	0.59017		8.747	68.092	0.54685		5.7043	107.06	0.70169
	7.3322	251.96	1.0852		9.74	71.68	1		7.3322	213.58	0.63531
	8.747	357.22	0.89896		1.0369	45.594	0.8179		8.747	296.85	1.171
	9.74	391.57	1		1.1152	30.869	0.72569		9.74	333.13	1
	1.0369	58.251	0.36307		1.4002	23.962	0.94903		1.0369	-22.905	0.14675
	1.1152	64.935	0.3682		1.8049	22.839	0.97809		1.1152	-7.2516	0.16758
	1.4002	70.754	0.33371		2.3786	32.5	0.49087		1.4002	-3.3351	0.062477
	1.8049	53.435	0.37561		3.1224	44.119	1.0404		1.8049	18.92	0.29508
	2.3786	59.51	0.26453		4.3053	61.512	1.1516		2.3786	13.15	0.15622
	3.1224	74.05	0.37142		5.7043	51.677	1.4052		3.1224	35.491	0.29288
	4.3053	130.82	0.61298		7.3322	66.105	0.99562		4.3053	60.582	0.42084
	5.7043	149.21	0.70737		8.747	80.628	0.56732		5.7043	17.405	1.1011
	7.3322	183.21	0.89484		9.74	97.691	1		7.3322	83.323	1.251
	8.747	242.52	1.1834		1.0369	82.838	0.55895		8.747	84.287	1.806
	9.74	258.37	1		1.1152	72.756	0.56361		9.74	56.675	1
	1.0369	63.795	0.087374		1.4002	62.853	0.35547		1.0369	42.423	0.091314
	1.1152	46.378	0.045983		1.8049	89.19	0.2427		1.1152	42.636	0.14012
	1.4002	37.58	0.064626		2.3786	95.307	0.64747		1.4002	71.224	0.17478
	1.8049	56.157	0.10303		3.1224	72.77	0.58169		1.8049	58.678	0.17193
	2.3786	94.758	-0.020745		4.3053	125.67	-0.026258		2.3786	65.989	0.20601
	3.1224	69.987	0.078235		5.7043	144.32	0.53639		3.1224	79.541	0.19682
	4.3053	78.425	0.12405		7.3322	192.27	0.66462		4.3053	110.31	0.35604
	5.7043	89.954	0.47109		8.747	229.24	0.59464		5.7043	146.83	0.52891
	7.3322	97.616	0.79944		9.74	244.79	1		7.3322	213.51	0.66225
	8.747	133.87	0.96782		1.0369	21.908	0.16648		8.747	284.8	0.99928
	9.74	170.19	1		1.1152	19.523	0.14719		9.74	338.3	1
	1.0369	85.864	0.42996		1.4002	23.763	0.15721		1.0369	9.7256	0.18693
	1.1152	79.307	0.49651		1.8049	24.224	0.071558		1.1152	-2.4738	0.096228
	1.4002	78.53	0.42563		2.3786	30.652	0.12973		1.4002	22.503	0.051139
	1.8049	124.7	0.63924		3.1224	38.116	0.17524		1.8049	7.5346	-0.038559
	2.3786	88.735	0.40076		4.3053	35.694	0.24463		2.3786	-11.072	0.070126
	3.1224	113.52	0.51683		5.7043	50.575	0.50128		3.1224	4.8334	0.13279
	4.3053	141.85	0.54259		7.3322	60.187	0.62021		4.3053	40.818	0.57282
	5.7043	210.51	0.59998		8.747	49.99	0.61915		5.7043	27.966	1.2158
	7.3322	252.63	0.51608		9.74	60.002	1		7.3322	42.356	0.86708
	8.747	344.71	0.96912		1.0369	96.018	0.98492		8.747	52.767	1.2657
	9.74	415.14	1		1.1152	67.902	0.78464		9.74	68.195	1
	1.0369	-98.867	0.0052335		1.4002	54.826	1.0529		1.0369	67.602	0.026001
	1.1152	-93.439	0.0087475		1.8049	55.067	1.0763		1.1152	66.431	-0.022674
	1.4002	-73.312	-0.35032		2.3786	71.999	1.131		1.4002	53.28	0.17439
	1.8049	-81.272	0.22976		3.1224	86.963	1.0149		1.8049	58.434	0.11538
	2.3786	-67.681	-0.33027		4.3053	107.33	1.0519		2.3786	66.147	0.21494
	3.1224	-45.049	-0.022493		5.7043	116.85	1.1648		3.1224	78.303	0.26378
	4.3053	-122.22	0.57789		7.3322	148.85	1.2071		4.3053	86.513	0.41878
	5.7043	-73.385	0.70148		8.747	159.32	1.8921		5.7043	108.42	0.61248
	7.3322	-61.132	0.25193		9.74	162.7	1		7.3322	149.71	1.127
	8.747	-72.626	1.8924		1.0369	46.41	0.36595		8.747	212.61	1.1059
	9.74	-33.454	1		1.1152	30.501	0.31112		9.74	211.26	1
	1.0369	120.94	0.77265		1.4002	23.402	0.27642		1.0369	84.49	0.14472
	1.1152	105.37	0.36895		1.8049	24.047	0.34367		1.1152	89.19	0.090669
	1.4002	93.761	0.58063		2.3786	33.095	0.4316		1.4002	109.45	0.24261
	1.8049	134.37	0.55662		3.1224	24.745	0.056259		1.8049	93.408	0.24449
	2.3786	120.72	0.71724		4.3053	52.676	0.61554		2.3786	120.08	0.29654
	3.1224	152.17	0.61761		5.7043	62.453	0.80859		3.1224	122.87	0.36418
	4.3053	153.04	0.38878		7.3322	88.431	0.80722		4.3053	177.23	0.30143
	5.7043	249.81	0.45046		8.747	70.731	1.3784		5.7043	236.54	0.51537
	7.3322	294.6	0.79344		9.74	56.307	1		7.3322	261.52	0.66326
	8.747	409.42	1.1213		1.0369	94.646	0.47213		8.747	325.42	0.93841
	9.74	577.04	1		1.1152	97.036	0.66075		9.74	406.35	1
	1.0369	47.158	0.48272		1.4002	103.35	0.62283		1.0369	27.076	0.052163
	1.1152	51.203	0.47131		1.8049	109.92	0.41755		1.1152	14.898	0.099092
	1.4002	51.476	0.41095		2.3786	108.34	0.56754		1.4002	6.1916	0.041972
	1.8049	55.244	0.53513		3.1224	112.88	0.4082		1.8049	1.6048	0.08722
	2.3786	63.703	0.41969		4.3053	164.66	0.56364		2.3786	-1.2024	0.13792
	3.1224	81.058	0.48627		5.7043	179.37	0.95055		3.1224	-5.6329	0.35754
	4.3053	69.627	0.44723		7.3322	180.72	0.92761		4.3053	42.147	0.50973
	5.7043	97.788	0.58483		8.747	213.75	1.3195		5.7043	46.151	0.85419
	7.3322	134.05	0.76523		9.74	208.03	1		7.3322	55.449	0.85887
	8.747	173.66	0.9687						8.747	56.825	1.2502
	9.74	201.41	1						9.74	61.666	1
	1.0369	-0.34957	0.43102						1.0369	60.17	0.16725
	1.1152	24.458	0.22803						1.1152	93.399	0.30214
	1.4002	7.5903	0.28553						1.4002	99.268	0.19933
	1.8049	30.015	0.30941						1.8049	100.32	0.2369
	2.3786	58.609	0.33817						2.3786	108.67	0.28037
	3.1224	69.129	0.32028						3.1224	115.8	0.29021
	4.3053	109.27	0.46195						4.3053	168.45	0.3113
	5.7043	151.84	0.56467						5.7043	173.92	0.48585
	7.3322	132.26	0.8019						7.3322	207.03	0.38538
	8.747	211.33	0.86701						8.747	300.11	0.90106
	9.74	240.44	1						9.74	325.65	1
	1.0369	28.239	0.00014247						1.0369	7.987	-0.041458
	1.1152	26.745	0.10341						1.1152	22.885	-0.074143
	1.4002	39.284	0.032297						1.4002	25.284	0.067391
	1.8049	41.986	0.1643						1.8049	8.7803	0.096744
	2.3786	44.319	0.096735						2.3786	22.875	0.078362
	3.1224	39.594	0.11515						3.1224	7.8454	0.13486
	4.3053	58.977	0.20124						4.3053	47.959	0.24652
	5.7043	75.002	0.48702						5.7043	35.24	0.57778
	7.3322	63.175	0.69477						7.3322	67.666	0.80625
	8.747	89.173	0.73258						8.747	87.942	0.99335
	9.74	105.92	1						9.74	74.25	1
	1.0369	31.76	0.30148						1.0369	167.71	0.20446
	1.1152	35.014	0.3744						1.1152	176.95	0.33855
	1.4002	39.722	0.36496						1.4002	178.9	0.35141
	1.8049	33.393	-0.28321						1.8049	207.69	0.093893
	2.3786	24.399	0.489						2.3786	215.76	0.51472
	3.1224	42.953	0.27134						3.1224	243.76	0.52335
	4.3053	55.092	0.44127						4.3053	255	0.34342
	5.7043	97.211	0.88955						5.7043	278.77	0.35431
	7.3322	120.6	0.26894						7.3322	435.19	0.5984
	8.747	156.87	0.87168						8.747	573.91	0.78079
	9.74	169.23	1						9.74	729.27	1
	1.0369	-7.8704	-0.13618						1.0369	74.701	0.3252
	1.1152	-11.401	-0.3123						1.1152	81.688	0.23297
	1.4002	-12.689	0.060456						1.4002	49.48	0.25696
	1.8049	-10.207	-0.11595						1.8049	62.942	0.37526
	2.3786	-0.25493	-0.27179						2.3786	81.165	0.22014
	3.1224	-11.354	0.051853						3.1224	95.885	0.29732
	4.3053	-3.7512	0.15644						4.3053	135.95	-0.12922
	5.7043	5.5393	0.22489						5.7043	168.7	0.39236
	7.3322	1.2952	1.4716						7.3322	261	0.34052
	8.747	-9.4687	0.63939						8.747	321.47	1.4606
	9.74	13.436	1						9.74	361.99	1
	1.0369	31.198	0.013899						1.0369	60.486	0.09635
	1.1152	31.236	0.13291						1.1152	48.307	0.23488
	1.4002	34.395	0.0090554						1.4002	60.041	0.14265
	1.8049	40.132	0.090213						1.8049	79.365	0.18865
	2.3786	39.869	0.036681						2.3786	74.641	0.20802
	3.1224	41.247	0.12058						3.1224	130.43	0.28231
	4.3053	62.097	0.047726						4.3053	120.62	0.40475
	5.7043	86.392	0.33646						5.7043	157.01	0.51558
	7.3322	97.15	0.4603						7.3322	232.14	0.87339
	8.747	123.92	0.75452						8.747	312.57	1.2204
	9.74	126.65	1						9.74	350.46	1
	1.0369	9.4418	0.021974						1.0369	111.99	0.066529
	1.1152	6.2545	0.09755						1.1152	113.61	0.036269
	1.4002	-1.2434	0.15258						1.4002	137.59	-0.16147
	1.8049	2.5683	0.05						1.8049	152.9	-0.34388
	2.3786	2.5534	1.1136						2.3786	178.92	0.12669
	3.1224	-2.4425	0.061741						3.1224	247.15	0.083862
	4.3053	22.373	-0.011889						4.3053	167.64	0.11977
	5.7043	19.854	0.50566						5.7043	256.16	0.17558
	7.3322	25.599	0.96923						7.3322	372.85	0.42659
	8.747	13.066	0.26124						8.747	438.3	0.92066
	9.74	16.418	1						9.74	540.98	1
	1.0369	8.0007	0.303						1.0369	9.9166	0.2231
	1.1152	8.7141	-0.055134						1.1152	-12.805	0.30739
	1.4002	8.044	-0.024354						1.4002	-11.721	0.18149
	1.8049	13.518	0.35078						1.8049	0.42942	0.30894
	2.3786	11.04	0.33246						2.3786	19.22	0.34497
	3.1224	15.939	0.29333						3.1224	14.947	0.35435
	4.3053	39.063	0.34855						4.3053	14.974	0.48316
	5.7043	60.8	0.44476						5.7043	48.404	0.32576
	7.3322	78.271	0.49105						7.3322	105.23	0.75095
	8.747	85.943	1.0427						8.747	103.21	0.95506
	9.74	94.696	1						9.74	134.53	1
	1.0369	21.499	0.14193						1.0369	93.522	0.16062
	1.1152	37.624	0.11825						1.1152	69.175	0.16918
	1.4002	23.59	0.11728						1.4002	39.406	0.27978
	1.8049	32.342	0.058247						1.8049	38.77	0.26663
	2.3786	13.048	0.081871						2.3786	44.599	0.24967
	3.1224	44.37	0.13694						3.1224	69.159	0.40167
	4.3053	50.627	0.26362						4.3053	160.51	0.59774
	5.7043	57.99	0.80096						5.7043	181.06	0.87264
	7.3322	68.364	0.6015						7.3322	172.37	0.92225
	8.747	93.174	0.99087						8.747	209.9	1.2572
	9.74	87.888	1						9.74	246.38	1
	1.0369	47.569	-0.062895
	1.1152	52.092	-0.2234
	1.4002	63.4	0.038355
	1.8049	66.749	0.034369
	2.3786	75.837	0.036459
	3.1224	72.777	0.14876
	4.3053	81.775	-0.016247
	5.7043	93.3	0.34888
	7.3322	145.44	0.3613
	8.747	171.37	0.73265
	9.74	189.61	1
	1.0369	47.414	-0.066197
	1.1152	41.315	-0.021498
	1.4002	41.037	0.26148
	1.8049	68.374	-0.023787
	2.3786	78.394	0.12506
	3.1224	51.963	0.40737
	4.3053	71.283	0.18808
	5.7043	84.774	0.13573
	7.3322	122.6	0.66515
	8.747	158.75	0.51752
	9.74	146.08	1
	1.0369	7.2652	0.17719
	1.1152	16.579	-0.14288
	1.4002	24.392	0.31428
	1.8049	15.991	0.072803
	2.3786	12.246	0.088526
	3.1224	22.239	-0.0047425
	4.3053	18.402	0.297
	5.7043	22.197	0.45248
	7.3322	26.971	0.57473
	8.747	43.813	0.74266
	9.74	36.261	1
	1.0369	39.986	0.12683
	1.1152	54.177	0.11616
	1.4002	48.325	0.015565
	1.8049	50.113	0.14043
	2.3786	54.141	0.11163
	3.1224	53.009	0.2536
	4.3053	67.102	0.20862
	5.7043	71.495	0.36828
	7.3322	100.05	0.69667
	8.747	119.75	0.82566
	9.74	150.96	1
	1.0369	-10.569	0.022881
	1.1152	-7.3589	0.023187
	1.4002	4.8502	-0.018258
	1.8049	0.46013	0.051882
	2.3786	2.404	0.025416
	3.1224	2.3078	-0.00081337
	4.3053	-0.86146	0.43573
	5.7043	7.2511	0.78957
	7.3322	2.7881	0.90465
	8.747	7.0505	1.3311
	9.74	13.967	1
	1.0369	-10.489	0.055129
	1.1152	-17.904	-0.016742
	1.4002	1.3737	-0.068988
	1.8049	-6.3253	-0.082313
	2.3786	-5.4869	-0.024054
	3.1224	-2.7948	-0.061027
	4.3053	5.7952	0.24614
	5.7043	4.5939	1.0811
	7.3322	11.835	1.4634
	8.747	6.4283	1.3654
	9.74	11.614	1
	1.0369	29.514	0.10619
	1.1152	35.657	0.20775
	1.4002	29.536	0.18797
	1.8049	34.485	0.29895
	2.3786	42.83	0.17525
	3.1224	39.976	0.10507
	4.3053	52.864	0.41582
	5.7043	67.188	0.48824
	7.3322	81.464	0.52784
	8.747	96.631	1.0427
	9.74	112.13	1
	1.0369	34.043	0.68308
	1.1152	36.561	0.44432
	1.4002	29.078	0.17946
	1.8049	30.26	0.52846
	2.3786	46	0.58735
	3.1224	33.769	0.43312
	4.3053	64.723	0.75075
	5.7043	61.843	0.66408
	7.3322	66.51	-0.040669
	8.747	81.328	1.8609
	9.74	73.793	1
	1.0369	14.563	0.343
	1.1152	10.026	0.083014
	1.4002	12.789	0.46957
	1.8049	16.544	0.44194
	2.3786	15.269	0.11053
	3.1224	26.948	0.24337
	4.3053	36.374	0.0041092
	5.7043	34.692	0.43005
	7.3322	44.654	0.73607
	8.747	54.572	0.55959
	9.74	59.789	1
	1.0369	1.1644	0.3893
	1.1152	0.55034	0.66539
	1.4002	1.712	0.40963
	1.8049	12.368	0.41593
	2.3786	-6.7817	0.22091
	3.1224	8.2673	0.16482
	4.3053	15.419	0.44769
	5.7043	20.676	0.6703
	7.3322	44.549	0.60657
	8.747	49.23	0.9968
	9.74	52.92	1
	1.0369	8.5223	0.053687
	1.1152	0.47544	-0.0075531
	1.4002	11.67	-0.02451
	1.8049	14.817	0.026443
	2.3786	5.1037	0.024097
	3.1224	8.4234	0.015834
	4.3053	26.238	0.047934
	5.7043	25.928	0.3046
	7.3322	30.141	0.66153
	8.747	37.45	0.91478
	9.74	40.652	1
	1.0369	41.519	0.051585
	1.1152	29.4	0.10211
	1.4002	31.015	0.0075871
	1.8049	28.293	-0.018348
	2.3786	34.388	0.024664
	3.1224	35.971	0.019956
	4.3053	57.442	0.16304
	5.7043	46.416	0.52002
	7.3322	78.816	1.5219
	8.747	62.21	1.1883
	9.74	49.423	1

## Sheet: DAG normalized to PP2
	These are all the single cell DAG measurements comprising Figure 4–figure supplement 1, normalized to PP2 treatment.
	DAG data set 1				DAG data set 2				DAG data set 3
	LOV2 half-life (sec)	CAR occupancy	DAG level (normalized to PP2)		LOV2 half-life (sec)	CAR occupancy	DAG level (normalized to PP2)		LOV2 half-life (sec)	CAR occupancy	DAG level (normalized to PP2)
	1.0369	613.31	0.69871		1.0369	32.417	0.10614		1.0369	99.411	0.71257
	1.1152	1263.9	1.1949		1.1152	-751.15	-0.12944		1.1152	128.71	0.34607
	1.4002	1321.3	1.4879		1.4002	-192.02	0.56345		1.4002	256.73	0.34338
	1.8049	1410.1	0.23179		1.8049	70.557	-0.15288		1.8049	214.82	0.72046
	2.3786	1136.8	0.30877		2.3786	-0.0030619	-0.12724		2.3786	290.7	1.1921
	3.1224	1730.6	1.327		3.1224	1293.6	0.37679		3.1224	327.81	1.2896
	4.3053	1735	1.6387		4.3053	133.91	1.8024		4.3053	395.15	2.1111
	5.7043	2271.7	1.9627		5.7043	921.85	2.4886		5.7043	747.8	1.7579
	7.3322	2860	2.585		7.3322	1819.8	1.3102		7.3322	853.97	2.4198
	8.747	4182.5	4.1517		8.747	1743.5	2.5797		8.747	1094.5	3.0353
	9.74	4357.7	3.9668		9.74	993.17	1.2074		9.74	1123.4	2.7189
	1.0369	-58.774	0.54461		1.0369	-95.865	-0.47314		1.0369	-28.841	0.83559
	1.1152	128.54	0.71936		1.1152	-222.19	-0.44372		1.1152	67.047	0.79837
	1.4002	43.351	0.50264		1.4002	-205.57	-0.24739		1.4002	78.537	0.90771
	1.8049	-43.86	0.82882		1.8049	2.8463	-0.4176		1.8049	116.58	1.0905
	2.3786	-34.266	1.208		2.3786	13.162	-0.31999		2.3786	208.93	0.94346
	3.1224	-3.4571	1.905		3.1224	233.88	-0.088174		3.1224	274.77	1.0195
	4.3053	319.08	7.0347		4.3053	171.01	1.215		4.3053	182.88	0.66357
	5.7043	360.01	6.6635		5.7043	509.46	2.0024		5.7043	209.05	2.3661
	7.3322	270.04	6.2127		7.3322	537.94	1.4044		7.3322	409.52	3.1233
	8.747	357.37	5.8391		8.747	585.19	1.9273		8.747	431.29	3.1367
	9.74	298.08	9.6974		9.74	650.15	1.4991		9.74	397.69	4.6351
	1.0369	601.34	0.42228		1.0369	-260.49	-0.41103		1.0369	88.498	1.1614
	1.1152	579.5	0.29069		1.1152	-338.05	-0.36681		1.1152	189.29	3.2511
	1.4002	676.47	0.24158		1.4002	-294.16	-0.25122		1.4002	499.93	1.0596
	1.8049	600.14	0.16232		1.8049	-153.9	-0.23125		1.8049	1154.4	2.0968
	2.3786	717.01	0.18853		2.3786	-101.27	-0.35769		2.3786	1660.8	0.69231
	3.1224	726.55	0.40811		3.1224	-145.8	-0.14031		3.1224	1942.5	2.1897
	4.3053	1180.6	1.0546		4.3053	456.92	0.077456		4.3053	836.22	1.1748
	5.7043	1185	1.4662		5.7043	1110.3	0.033718		5.7043	1464.8	1.934
	7.3322	1737.7	2.2795		7.3322	1042.3	0.26728		7.3322	2440.8	3.3893
	8.747	1831.5	3.1736		8.747	1023.3	0.83527		8.747	4142.6	4.0893
	9.74	1788.1	1.9814		9.74	1083.1	0.36464		9.74	4581.1	3.8063
	1.0369	2438.3	2.0439		1.0369	52.434	-0.17616		1.0369	326.48	0.6914
	1.1152	2143.2	1.27		1.1152	281.67	-0.26922		1.1152	177.51	-0.029608
	1.4002	2352.2	1.2912		1.4002	-15.172	-0.23958		1.4002	201.03	0.33374
	1.8049	2447.1	0.018566		1.8049	267.41	-0.25829		1.8049	137.19	0.76805
	2.3786	2219.3	0.31118		2.3786	312.47	-0.22941		2.3786	93.155	1.0302
	3.1224	2601.2	1.7083		3.1224	415.06	0.1522		3.1224	142.7	2.2882
	4.3053	2935.3	0.96381		4.3053	776.48	0.29109		4.3053	467.98	1.4715
	5.7043	3668.1	2.0461		5.7043	889.9	1.5578		5.7043	430.59	4.7379
	7.3322	4194.7	0.2986		7.3322	1271.2	1.5836		7.3322	405.63	4.5443
	8.747	4753	1.5836		8.747	1270.1	3.1037		8.747	430.23	4.8319
	9.74	4810.1	2.6102		9.74	1334.1	2.3541		9.74	438.28	5.5456
	1.0369	576.19	0.46633		1.0369	757.27	-0.38574		1.0369	523.24	1.2358
	1.1152	446.37	0.83616		1.1152	118.56	-0.52923		1.1152	447.93	1.332
	1.4002	487.04	0.19111		1.4002	148.26	-0.41916		1.4002	488.16	1.2861
	1.8049	387.12	0.50216		1.8049	172.98	-0.52011		1.8049	419.22	1.4818
	2.3786	427.87	-0.10478		2.3786	142.4	-0.45268		2.3786	534.54	1.5723
	3.1224	726.1	0.44425		3.1224	251.68	-0.46192		3.1224	611.48	1.7026
	4.3053	912.12	1.9082		4.3053	1877.7	-0.28504		4.3053	931.23	1.1654
	5.7043	1057.8	1.7524		5.7043	2105.1	-0.20676		5.7043	993.56	1.6216
	7.3322	1503.1	2.8308		7.3322	2092.7	-0.0060446		7.3322	1068	2.0008
	8.747	2059.3	4.2337		8.747	2746.2	-0.13019		8.747	1223.2	2.384
	9.74	1976.6	3.6002		9.74	2916.5	0.74642		9.74	1330.1	2.8685
	1.0369	64.834	-0.76052		1.0369	1533.6	-0.16769		1.0369	653.06	1.0039
	1.1152	103.03	0.75101		1.1152	1502.4	-0.5585		1.1152	575.98	0.014991
	1.4002	-31.012	1.9494		1.4002	1276.8	-0.33838		1.4002	474.19	-0.09717
	1.8049	-95.165	0.62547		1.8049	1513.3	-0.23593		1.8049	460.95	1.1099
	2.3786	19.364	2.0057		2.3786	1065.7	-0.29466		2.3786	520.14	1.2803
	3.1224	191.72	1.0544		3.1224	1580.3	-0.11112		3.1224	579.22	1.3571
	4.3053	305.89	3.4341		4.3053	2740	1.04		4.3053	891.05	1.1194
	5.7043	393.04	3.4137		5.7043	3507.3	1.7091		5.7043	1060	3.5404
	7.3322	508.89	3.2656		7.3322	4424.1	0.90497		7.3322	1313.9	6.3288
	8.747	342.4	3.3773		8.747	4941.3	1.3028		8.747	1451.6	7.034
	9.74	410.88	4.2056		9.74	7296.4	1.751		9.74	1504.2	7.6272
	1.0369	290.83	0.86905		1.0369	475.64	0.67874		1.0369	1598.5	-0.20564
	1.1152	371	0.73425		1.1152	1067.1	0.13063		1.1152	1377.8	1.0279
	1.4002	229.88	0.49408		1.4002	1515.7	0.58686		1.4002	1325	1.572
	1.8049	352.93	0.89298		1.8049	1338.2	-0.70195		1.8049	1469.1	1.2486
	2.3786	344.94	0.88545		2.3786	1339.5	0.56945		2.3786	1807.5	1.4133
	3.1224	530.92	0.52224		3.1224	1221.8	0.6974		3.1224	1841.9	1.0793
	4.3053	550.25	1.0788		4.3053	647.25	2.1034		4.3053	1682.1	1.597
	5.7043	890.08	1.3286		5.7043	1272.8	5.3294		5.7043	2052.4	1.3046
	7.3322	1311.4	1.9315		7.3322	1404.6	5.5117		7.3322	2539.6	1.4317
	8.747	1802	2.5344		8.747	1346	4.3815		8.747	3194	1.3039
	9.74	1639.7	2.5728		9.74	1498.5	4.2533		9.74	3510.1	2.213
	1.0369	1763.7	-0.045133		1.0369	1312.9	0.58705		1.0369	658.9	0.90856
	1.1152	1737.2	0.64682		1.1152	1244.4	-0.45366		1.1152	603.83	1.0435
	1.4002	1842.1	0.47589		1.4002	1128.2	0.32654		1.4002	567.03	0.86346
	1.8049	1501.2	0.79542		1.8049	1382.7	0.24283		1.8049	604.46	1.2416
	2.3786	1657	0.70931		2.3786	1146.3	0.39733		2.3786	638.53	1.2825
	3.1224	1892.7	1.8107		3.1224	1538.5	0.63739		3.1224	707.84	1.3395
	4.3053	2375.6	0.86805		4.3053	1800.8	0.73181		4.3053	841.64	0.5554
	5.7043	2878.7	0.80509		5.7043	2538.2	2.1747		5.7043	1055	1.5758
	7.3322	3921.3	2.9834		7.3322	3154.8	1.8906		7.3322	1453.1	2.0847
	8.747	4036.7	4.3692		8.747	3680.7	2.4425		8.747	1687.3	3.5278
	9.74	4776.8	5.4823		9.74	4306	1.9716		9.74	1816.9	4.3933
	1.0369	949.1	1.0075		1.0369	540.72	0.57437		1.0369	311.99	0.47074
	1.1152	1800	1.1049		1.1152	632.49	0.91286		1.1152	268.29	-0.48824
	1.4002	1841	1.2849		1.4002	609.62	1.0689		1.4002	248.84	0.096513
	1.8049	1787.8	1.0334		1.8049	696.47	0.6288		1.8049	228.47	0.82676
	2.3786	1788.9	0.94414		2.3786	716.04	0.69529		2.3786	207.33	2.5637
	3.1224	2079.2	1.0335		3.1224	795.05	1.0487		3.1224	268.41	0.84406
	4.3053	2361	1.6783		4.3053	1308.8	1.4546		4.3053	345.98	1.9756
	5.7043	3025.8	1.6884		5.7043	1604.3	3.271		5.7043	487.89	3.7772
	7.3322	3582.4	2.171		7.3322	1982.2	3.5455		7.3322	493.31	5.9657
	8.747	4501.7	2.686		8.747	2368.3	4.2447		8.747	518.7	9.1722
	9.74	4961.5	2.785		9.74	2613.7	5.5557		9.74	466.43	8.9942
	1.0369	1414.1	-0.0041215		1.0369	1675.6	1.3604		1.0369	649.35	2.0641
	1.1152	514.98	0.80484		1.1152	1747.9	0.75226		1.1152	628.19	1.738
	1.4002	493.66	0.65307		1.4002	1771.5	1.3177		1.4002	759.02	1.3798
	1.8049	555.73	0.78534		1.8049	2188.8	1.4603		1.8049	800.36	1.0956
	2.3786	899.54	0.78169		2.3786	2156.1	0.90327		2.3786	996.81	1.725
	3.1224	793.43	1.1603		3.1224	2403.3	1.0169		3.1224	1082.7	1.3984
	4.3053	1051.9	1.5059		4.3053	2380.3	2.1093		4.3053	1029.5	2.2781
	5.7043	1259.7	3.2604		5.7043	3383.6	3.2729		5.7043	1457.9	2.936
	7.3322	1537.4	4.4461		7.3322	4599.6	3.098		7.3322	2164.7	4.8614
	8.747	1715.8	2.5604		8.747	6038.2	3.9694		8.747	2627.8	6.5838
	9.74	1903.5	3.4968		9.74	7520.2	2.8344		9.74	2918.1	6.3415
	1.0369	1835.2	3.0574		1.0369	-253.13	0.21771		1.0369	779.22	0.51219
	1.1152	1353.1	3.6871		1.1152	-341.17	0.37423		1.1152	755.82	-0.7475
	1.4002	1107.7	3.8349		1.4002	-476.11	-0.021805		1.4002	759	0.67342
	1.8049	1229.5	3.8718		1.8049	-901.18	0.38124		1.8049	839.53	0.34737
	2.3786	1624.2	4.4448		2.3786	-680.81	0.92858		2.3786	510.6	-0.28209
	3.1224	1668.7	4.7624		3.1224	-716.57	0.50344		3.1224	541.88	-0.15119
	4.3053	1636.3	5.3708		4.3053	81.277	1.0706		4.3053	1156.3	-0.30954
	5.7043	2017	2.9544		5.7043	96.795	1.4628		5.7043	1166.9	-0.50539
	7.3322	2991.9	4.6153		7.3322	322.85	-0.97866		7.3322	1563.4	0.347
	8.747	3743.3	4.361		8.747	236.03	1.301		8.747	1464.6	1.0818
	9.74	4547.5	5.5236		9.74	-800.67	0.79156		9.74	1465.5	1.2194
	1.0369	694.89	1.6539		1.0369	892.45	1.3187		1.0369	603.89	0.99378
	1.1152	417.73	1.5429		1.1152	626.9	2.4874		1.1152	627.66	1.258
	1.4002	479.47	1.5635		1.4002	751.83	1.4185		1.4002	485.26	1.101
	1.8049	417.89	1.3108		1.8049	759.93	1.2983		1.8049	401.95	0.99214
	2.3786	501.04	1.7		2.3786	759.34	0.94096		2.3786	343.67	2.0011
	3.1224	488.78	2.0518		3.1224	908.06	2.192		3.1224	428.56	2.0288
	4.3053	790.31	2.0435		4.3053	1490.7	1.931		4.3053	732.27	0.83605
	5.7043	948.03	2.7841		5.7043	2203.3	2.8201		5.7043	746.21	2.467
	7.3322	1243	3.2223		7.3322	2666.9	3.5441		7.3322	795.47	4.3092
	8.747	1321	3.6372		8.747	3319	3.9167		8.747	822.73	4.3579
	9.74	1496.8	3.0842		9.74	4092.3	3.6044		9.74	800.15	5.092
	1.0369	553.83	0.24625		1.0369	340.91	0.79104		1.0369	1424.4	0.91686
	1.1152	523.77	0.096453		1.1152	438.56	0.4763		1.1152	1094	0.97169
	1.4002	580.34	0.050893		1.4002	266.36	0.13513		1.4002	1011.6	0.61342
	1.8049	592.62	-0.011769		1.8049	466.44	-0.32579		1.8049	1017.3	1.6637
	2.3786	870.64	0.70068		2.3786	484.89	0.19685		2.3786	1167	0.75025
	3.1224	830.5	0.42638		3.1224	271.23	1.5453		3.1224	1172.8	1.1047
	4.3053	1081.4	0.63719		4.3053	507.34	2.5588		4.3053	1405.9	1.2928
	5.7043	1842.2	1.5621		5.7043	916.32	4.2508		5.7043	1559.8	2.1525
	7.3322	1981	2.4389		7.3322	1117.4	3.0074		7.3322	1789	2.7682
	8.747	2782.1	3.1186		8.747	1157.1	1.9555		8.747	1783.5	2.052
	9.74	2993.1	3.3895		9.74	1429.8	2.1902		9.74	1839.6	4.1568
	1.0369	782.22	2.5403		1.0369	0.11189	0.5262		1.0369	126.93	-0.05645
	1.1152	1085.1	2.3602		1.1152	-204.07	0.34113		1.1152	129.66	-0.3847
	1.4002	1084.9	2.0126		1.4002	-436.45	0.056352		1.4002	141.83	0.34503
	1.8049	1477.7	0.29111		1.8049	-183.87	0.38115		1.8049	11.766	0.051991
	2.3786	1580.7	1.9219		2.3786	43.504	0.55992		2.3786	-9.6106	0.32991
	3.1224	1646.2	3.8043		3.1224	68.129	1.897		3.1224	-108.91	0.10684
	4.3053	1492.8	4.522		4.3053	171.16	4.0077		4.3053	119.01	0.2626
	5.7043	2121.1	5.3078		5.7043	600.26	6.718		5.7043	141.47	1.5531
	7.3322	2407	6.1883		7.3322	779.48	7.0397		7.3322	88.251	2.6399
	8.747	2874.5	7.2743		8.747	913.17	7.0027		8.747	70.192	3.4567
	9.74	3453.8	8.1913		9.74	1061.3	11.095		9.74	172.62	1.798
	1.0369	1668.5	0.35064		1.0369	-1021.9	-0.27166		1.0369	88.196	0.096196
	1.1152	1960	0.48647		1.4002	319.78	0.32993		1.1152	94.736	0.1616
	1.4002	2464.1	1.1286		1.8049	109.74	0.65748		1.4002	94.851	0.047326
	1.8049	1601.7	1.0712		2.3786	-35.962	0.37899		1.8049	141.7	0.17979
	2.3786	1754.8	1.0955		3.1224	799.54	2.1311		2.3786	123.21	0.13551
	3.1224	2003.9	1.4107		5.7043	481.89	4.4825		3.1224	228.93	0.84843
	4.3053	2237.8	0.92627		7.3322	713.42	3.3957		4.3053	271.96	1.0711
	5.7043	2720.1	1.3253		8.747	587.5	5.8431		5.7043	230.4	2.4919
	7.3322	3090.7	2.4444		9.74	489.23	3.254		7.3322	273.83	2.6923
	8.747	3405.1	2.0278		1.0369	-703.31	0.024078		8.747	292.47	2.8391
	9.74	3856.9	2.6259		1.1152	-837.38	-0.024977		9.74	304.17	2.8016
	1.0369	215.71	1.0341		1.4002	-1139.6	-0.087009		1.0369	2589.8	1.0618
	1.1152	192.67	0.49516		1.8049	-1112.7	0.083129		1.1152	2685.3	0.73408
	1.4002	156.15	0.62222		2.3786	-767.46	0.35869		1.4002	2745.4	0.75157
	1.8049	180.62	0.32295		3.1224	-745.48	0.17967		1.8049	2504.7	0.9738
	2.3786	190.97	0.94257		4.3053	-543.8	1.5989		2.3786	3054.4	0.42582
	3.1224	262.48	1.105		5.7043	-706.57	2.116		3.1224	2812	1.2296
	4.3053	483.46	2.905		7.3322	-607.92	1.9188		4.3053	2884.5	0.20129
	5.7043	517.03	2.9704		8.747	-383.99	3.2675		5.7043	2978.1	0.8682
	7.3322	723.06	3.6486		9.74	-397.21	1.8359		7.3322	3645.6	2.4444
	8.747	624.97	3.1681		1.0369	757.99	1.9184		8.747	4436.5	3.013
	9.74	617.51	2.5674		1.1152	547	1.631		9.74	5242.9	1.9355
	1.0369	367.3	0.31734		1.4002	707.21	0.98014		1.0369	283.07	1.9589
	1.1152	185.17	-0.15613		1.8049	869.78	1.3202		1.1152	264.34	1.3994
	1.4002	168.71	0.67327		2.3786	822.75	1.6024		1.4002	308.35	1.4153
	1.8049	281.39	1.0306		3.1224	1204.1	1.4474		1.8049	362.21	1.1986
	2.3786	234.67	0.73944		4.3053	2054.7	2.1892		2.3786	460.49	2.5031
	3.1224	313.82	1.0295		5.7043	2345.7	3.0347		3.1224	492.85	2.3226
	4.3053	397.61	2.4018		7.3322	3531.2	3.4383		4.3053	486.43	1.1923
	5.7043	541.44	3.6777		8.747	4456.4	4.5665		5.7043	517.78	1.5755
	7.3322	643.08	2.6958		9.74	4532.4	3.8039		7.3322	855.15	2.4006
	8.747	701.32	3.1263		1.0369	189.29	0.53695		8.747	901.74	3.7577
	9.74	648.5	2.2543		1.1152	129.99	0.24002		9.74	924.3	4.6079
	1.0369	599.08	1.1959		1.4002	204.47	0.011937		1.0369	144.09	-0.3055
	1.1152	426.88	1.5855		1.8049	90.951	0.33321		1.1152	220.82	0.12713
	1.4002	440.79	1.5542		2.3786	331.9	0.23027		1.4002	278.72	0.43902
	1.8049	645.45	1.4583		3.1224	287.65	0.73101		1.8049	296.87	0.058208
	2.3786	667.03	1.6348		4.3053	226.39	2.3192		2.3786	386.18	0.8178
	3.1224	833.16	2.1862		5.7043	30.015	2.7241		3.1224	381.52	0.74739
	4.3053	973.17	1.7419		7.3322	251.27	3.2996		4.3053	347.23	0.90377
	5.7043	1317.4	1.4802		8.747	312.5	3.2437		5.7043	359.16	1.4633
	7.3322	1660.1	2.312		9.74	358.13	2.9197		7.3322	579.9	3.484
	8.747	2135.3	2.4727		1.0369	1378.8	0.73266		8.747	615.48	4.4953
	9.74	2297.5	3.5661		1.1152	1558.3	0.35199		9.74	593.01	4.7193
	1.0369	284.21	0.64659		1.4002	1288.3	0.21789		1.0369	1237.8	-0.82429
	1.1152	466.03	0.70468		1.8049	947.47	0.61474		1.1152	988.69	0.74183
	1.4002	521.77	0.20671		2.3786	1081.2	0.77609		1.4002	1227.6	0.39943
	1.8049	529.02	0.12373		3.1224	2161	2.0144		1.8049	959.34	0.33423
	2.3786	611.26	0.96074		4.3053	3232.8	1.8174		2.3786	1251.9	0.83099
	3.1224	764.92	1.561		5.7043	2672.3	2.3996		3.1224	1675.5	0.74867
	4.3053	1319.6	3.3689		7.3322	4333.1	2.3642		4.3053	1498.3	0.66726
	5.7043	1798.6	5.6435		8.747	4379.7	3.2917		5.7043	1832.6	1.7796
	7.3322	2065.4	5.9238		9.74	6739.9	4.2114		7.3322	1802.1	3.5522
	8.747	2143.8	6.6421		1.0369	934.23	0.87932		8.747	2506	4.6883
	9.74	2595.2	6.6604		1.1152	839.01	0.56092		9.74	2346.1	3.9525
	1.0369	2456.9	0.35551		1.4002	734.86	0.25098		1.0369	92.625	-0.085112
	1.1152	2274	1.2603		1.8049	884.16	0.018119		1.1152	38.135	-0.21474
	1.4002	3462.4	1.246		2.3786	607.1	0.12166		1.4002	17.239	-0.11178
	1.8049	2543.9	0.85019		3.1224	754	0.2128		1.8049	45.966	-0.11125
	2.3786	3774.4	1.842		4.3053	1568.1	1.8569		2.3786	132.29	-0.20301
	3.1224	3220.3	1.1939		5.7043	1929	3.6292		3.1224	199.99	-0.070154
	4.3053	3156.8	2.4386		7.3322	2708	5.3475		4.3053	118.26	2.4449
	5.7043	3514.5	2.6629		8.747	3107.9	3.6946		5.7043	158.63	3.0831
	7.3322	4284.3	3.2312		9.74	3324.9	5.4284		7.3322	275.53	4.1323
	8.747	6795.9	2.3738		1.0369	205.58	1.108		8.747	324.51	5.2102
	9.74	6382.1	2.7989		1.1152	-97.453	1.1191		9.74	248.45	4.2213
	1.0369	225.14	1.1666		1.4002	232.22	1.7067		1.0369	252.89	1.515
	1.1152	315.71	0.28671		1.8049	-42.721	1.1645		1.1152	234.72	1.6413
	1.4002	373.17	1.6638		2.3786	-205.51	1.1715		1.4002	243.71	2.6196
	1.8049	382.33	0.93362		3.1224	-3.6152	1.5356		1.8049	223.15	1.194
	2.3786	348.18	0.90459		4.3053	491.15	1.901		2.3786	232.35	1.466
	3.1224	384.18	2.4412		5.7043	446.9	6.4358		3.1224	233.4	3.1637
	4.3053	816.8	1.6367		7.3322	592.42	6.1094		4.3053	329.7	3.9976
	5.7043	1242.9	1.9372		8.747	888.02	7.2041		5.7043	379.94	3.6549
	7.3322	1712.6	3.2145		9.74	559.26	6.4705		7.3322	335.61	5.5253
	8.747	1726.1	3.7217		1.0369	319.48	1.4152		8.747	306.97	5.705
	9.74	1604.4	4.2996		1.1152	378.09	2.1708		9.74	385.69	6.9263
	1.0369	248.28	1.4488		1.4002	399.75	2.5866		1.0369	825.21	2.0223
	1.1152	152.05	0.82935		1.8049	189.67	2.9148		1.1152	1069.8	2.0699
	1.4002	111.66	0.89314		2.3786	299.3	2.9959		1.4002	1268.4	0.88396
	1.8049	83.739	1.257		3.1224	580.14	3.356		1.8049	1119.9	1.5892
	2.3786	186.39	1.0674		4.3053	923.49	4.8342		2.3786	1106.9	2.5509
	3.1224	242.25	1.7847		5.7043	1472.9	6.6512		3.1224	1234.6	1.9661
	4.3053	303.28	0.91028		7.3322	2062.9	6.4619		4.3053	1204.5	2.2426
	5.7043	273.84	2.1005		8.747	2363.4	7.4858		5.7043	1680	0.86338
	7.3322	322.49	1.4369		9.74	2792.8	8.2059		7.3322	1829.8	2.4507
	8.747	271.79	3.2005		1.0369	-159.71	0.5668		8.747	2093.3	0.82716
	9.74	362.94	2.4146		1.1152	-374.7	0.36831		9.74	1664.3	1.2641
	1.0369	227.41	-0.20832		1.4002	-347.58	0.33545		1.0369	69.578	0.74291
	1.1152	-12.708	0.25335		1.8049	-109.64	0.39642		1.1152	263.38	-0.49033
	1.4002	103.76	0.30244		2.3786	-388.88	0.69411		1.4002	527.2	-0.069772
	1.8049	163.66	-0.10219		3.1224	-27.611	0.47827		1.8049	559.77	0.073883
	2.3786	114.11	0.39875		4.3053	189.02	1.2233		2.3786	374.26	0.15442
	3.1224	153.54	0.83218		5.7043	-37.576	2.8881		3.1224	333.48	0.073971
	4.3053	211.58	1.7477		7.3322	48.095	5.4226		4.3053	505.59	1.0489
	5.7043	247.09	2.9858		8.747	-152.3	5.1965		5.7043	428.07	0.52865
	7.3322	324.01	3.6539		9.74	-105.68	3.667		7.3322	431.81	1.355
	8.747	287.45	4.4246		1.0369	-575.23	1.0786		8.747	210.28	2.1915
	9.74	299.91	2.6377		1.1152	-1010.5	1.0846		9.74	417.15	2.1521
	1.0369	265.17	0.20883		1.4002	-880.47	0.77453		1.0369	1136.4	1.4172
	1.1152	123.21	-0.05582		1.8049	-343.09	0.89335		1.1152	1243.6	2.3499
	1.4002	76.093	0.75726		2.3786	-608.93	1.0365		1.4002	1028.9	0.63698
	1.8049	106.68	0.42512		3.1224	-708.52	1.3929		1.8049	1010.9	1.9393
	2.3786	105.65	1.793		4.3053	28.758	0.89947		2.3786	938.88	1.9582
	3.1224	222.36	2.8287		5.7043	-420	2.5073		3.1224	908.83	2.6491
	4.3053	371.08	3.8538		7.3322	-9.7808	2.3093		4.3053	1355.9	3.0613
	5.7043	418.19	3.2122		8.747	-152.55	3.2646		5.7043	1249.2	2.1231
	7.3322	617.14	5.7663		9.74	-66.919	1.5202		7.3322	1227.6	3.5197
	8.747	723.59	5.0885		1.0369	323.14	0.40074		8.747	1346.2	4.0814
	9.74	856.96	10.289		1.1152	372.12	1.1922		9.74	1448.3	4.2603
	1.0369	1050.2	1.2531		1.4002	241.01	1.1025		1.0369	624.63	1.3749
	1.1152	1020.5	1.6607		1.8049	418.09	0.025834		1.1152	609.99	0.72418
	1.4002	1237.5	2.2207		2.3786	422.46	1.1931		1.4002	787.57	0.86483
	1.8049	894.29	2.6188		3.1224	359.65	1.0138		1.8049	849.46	1.4694
	2.3786	1140.4	2.4666		4.3053	507.09	0.68728		2.3786	829	0.50075
	3.1224	1039.2	1.7493		5.7043	744.06	1.7038		3.1224	831.38	1.133
	4.3053	1633.2	2.4592		7.3322	827.92	1.6574		4.3053	1020.5	1.2076
	5.7043	2180.8	3.3		8.747	744.63	1.7782		5.7043	1003.4	1.4404
	7.3322	2608.2	1.8197		9.74	731.12	1.7184		7.3322	1143.5	2.12
	8.747	2615.4	4.3096		1.0369	1077.6	2.1937		8.747	1093.6	1.3333
	9.74	2947.3	6.1083		1.1152	1023.9	1.9768		9.74	1305.1	2.1206
	1.0369	571.66	0.45344		1.4002	999.8	1.8062		1.0369	240.4	0.70823
	1.1152	300.36	1.2672		1.8049	1086.8	1.8034		1.1152	198.29	0.36614
	1.4002	261.06	0.87872		2.3786	1091.2	2.022		1.4002	176.26	0.30073
	1.8049	311.89	1.3475		3.1224	1253.1	1.9044		1.8049	171.02	0.71835
	2.3786	379.7	2.1334		4.3053	1657	1.5921		2.3786	196.16	0.35115
	3.1224	518.25	1.7276		5.7043	1777.3	2.0611		3.1224	206.82	0.73423
	4.3053	603.7	2.5085		7.3322	2077.7	2.1584		4.3053	309.04	1.2809
	5.7043	643.6	3.8525		8.747	2330.4	2.7228		5.7043	298.88	2.9067
	7.3322	848.37	5.0229		9.74	2464.6	2.6177		7.3322	353.83	1.989
	8.747	927.71	5.4707		1.0369	302.12	2.5727		8.747	336.77	3.445
	9.74	1146.1	4.6749		1.1152	205.69	3.2468		9.74	352.83	4.1517
	1.0369	843.27	1.8346		1.4002	51.108	3.1469		1.0369	279.67	0.0061302
	1.1152	890.3	1.8286		1.8049	82.454	2.3479		1.1152	343.36	0.38584
	1.4002	1120.2	1.301		2.3786	98.1	3.6871		1.4002	479.73	0.68202
	1.8049	1249	1.6309		3.1224	210.35	3.1675		1.8049	419.82	0.51397
	2.3786	1035.7	1.8395		4.3053	575.24	3.1634		2.3786	384.89	0.58026
	3.1224	1563	1.6469		5.7043	466.49	3.6429		3.1224	664.4	0.91463
	4.3053	1520.9	2.8306		7.3322	766.99	3.5095		4.3053	540.05	0.80076
	5.7043	1627.8	2.3636		8.747	717.43	3.2166		5.7043	651.16	0.9075
	7.3322	2093.2	2.6544		9.74	793.88	3.5532		7.3322	659.6	0.90011
	8.747	2677.2	3.047		1.0369	477.96	-0.023241		8.747	746.91	1.5752
	9.74	2563.2	3.8592		1.1152	175.96	0.14606		9.74	764.68	0.79803
	1.0369	-87.119	0.48044		1.4002	197.69	0.034923		1.0369	278.66	2.3465
	1.1152	-145.66	0.92969		1.8049	-46.508	0.14089		1.1152	303.81	2.2271
	1.4002	-48.278	0.0054129		2.3786	340.42	0.13054		1.4002	314.18	2.1022
	1.8049	-83.513	1.4624		3.1224	-330.08	0.29088		1.8049	296.52	1.9326
	2.3786	-20.51	1.096		4.3053	832.35	0.51768		2.3786	379.55	2.3493
	3.1224	-72.529	1.5024		5.7043	596.5	1.4131		3.1224	290.84	2.0825
	4.3053	-32.296	8.207		7.3322	452.83	5.4985		4.3053	434.77	2.5443
	5.7043	69.089	8.1274		8.747	902.72	0.55643		5.7043	435.57	1.913
	7.3322	51.404	7.4191		9.74	173.57	0.41242		7.3322	595.11	2.5097
	8.747	77.962	6.1412		1.0369	436.24	1.3236		8.747	646.35	2.5547
	9.74	99.431	4.3084		1.1152	465.85	1.5621		9.74	800.28	2.5488
	1.0369	1676.6	0.01784		1.4002	613.57	2.332		1.0369	58.759	1.4242
	1.1152	1396.3	-0.21801		1.8049	622.72	2.0965		1.1152	45.739	0.40715
	1.4002	1364	-0.010657		2.3786	615.92	1.9978		1.4002	7.087	0.36423
	1.8049	987.1	0.077905		3.1224	800.1	2.344		1.8049	41.655	1.0261
	2.3786	1198.9	0.19324		4.3053	874.23	2.0223		2.3786	42.995	1.2888
	3.1224	1151.3	0.055612		5.7043	986.11	2.9875		3.1224	88.762	0.74709
	4.3053	1657.3	0.11296		7.3322	964.38	4.1321		4.3053	90.597	2.0379
	5.7043	2035.7	0.41273		8.747	1219.1	5.6793		5.7043	142.23	3.3866
	7.3322	2743.6	0.93456		9.74	1348.2	2.2455		7.3322	137.34	0.88249
	8.747	3622.9	1.3775		1.0369	-124.86	0.32577		8.747	205.38	3.9596
	9.74	4171.3	1.8175		1.1152	-223.36	-0.3524		9.74	158.08	3.4439
	1.0369	123.45	2.9367		1.4002	-193.86	0.044524		1.0369	764	3.1998
	1.1152	373.4	3.9625		1.8049	-291.64	-0.030101		1.1152	841.49	2.7309
	1.4002	278.69	2.5104		2.3786	-89.958	-0.041959		1.4002	930.44	3.4393
	1.8049	412.31	1.4291		3.1224	-56.869	-0.074018		1.8049	761.43	2.476
	2.3786	425.72	2.3742		4.3053	75.739	0.76032		2.3786	714.67	3.1556
	3.1224	636.21	2.3274		5.7043	97.885	1.997		3.1224	1014.8	1.6774
	4.3053	543.5	4.7504		7.3322	65.303	4.1651		4.3053	1013.9	3.2764
	5.7043	625.66	4.1746		8.747	183.55	4.0553		5.7043	1016.5	3.0205
	7.3322	717.71	3.1743		9.74	123.64	3.2272		7.3322	1139.4	2.9199
	8.747	709.11	3.7198		1.0369	565.14	2.1494		8.747	1370.3	3.7118
	9.74	524.27	3.1962		1.1152	474.11	2.888		9.74	1421.8	3.8814
	1.0369	87.075	0.60882		1.4002	530.9	2.8491		1.0369	75.499	0.98023
	1.1152	56.616	0.19374		1.8049	636.92	2.7993		1.1152	242.18	0.90115
	1.4002	20.895	0.32268		2.3786	665.52	3.841		1.4002	-59.907	0.92058
	1.8049	49.655	0.47964		3.1224	653.81	3.5764		1.8049	127.37	1.7679
	2.3786	45.075	0.19926		4.3053	594.53	3.3092		2.3786	96.193	1.964
	3.1224	48.695	0.51714		5.7043	956.28	4.4218		3.1224	78.806	2.718
	4.3053	121.16	1.9154		7.3322	1176.2	4.9456		4.3053	347.41	1.2203
	5.7043	198.98	2.2687		8.747	1207.8	4.7111		5.7043	218.85	5.7273
	7.3322	259.8	3.1811		9.74	1403.8	5.055		7.3322	315.25	3.4158
	8.747	309.59	2.6024		1.0369	264.68	0.1357		8.747	334.43	5.2841
	9.74	258.7	2.757		1.1152	412.27	0.47774		9.74	440.04	2.3987
	1.0369	199.8	0.89327		1.4002	468.72	0.62135		1.0369	675.1	1.198
	1.1152	202.9	0.47272		1.8049	611.68	0.57746		1.1152	705.57	-0.029617
	1.4002	161.53	0.63953		2.3786	828.56	0.62201		1.4002	695.21	0.47543
	1.8049	179.69	0.33347		3.1224	975.77	0.64207		1.8049	689.12	0.51158
	2.3786	175.96	0.26057		4.3053	774.15	1.75		2.3786	650.79	0.40455
	3.1224	189.18	0.39307		5.7043	1005.9	4.2964		3.1224	638.77	0.11214
	4.3053	329.54	2.1549		7.3322	955.58	4.5867		4.3053	841.04	1.2223
	5.7043	325.46	2.3772		8.747	1321.5	5.1399		5.7043	727.29	1.1427
	7.3322	353.51	5.2364		9.74	1235.5	2.0774		7.3322	830.78	1.232
	8.747	340.66	4.3326		1.0369	160.18	0.34503		8.747	768.96	0.85846
	9.74	332.84	4.5432		1.1152	263.96	0.77556		9.74	781.09	1.275
	1.0369	745.63	3.119		1.4002	452.85	0.83967		1.0369	70.883	0.84007
	1.1152	631.76	1.7126		1.8049	547	0.9919		1.1152	265.46	0.082431
	1.4002	545.38	4.0262		2.3786	641.17	0.76185		1.4002	195.75	0.41038
	1.8049	519.49	3.665		3.1224	638.64	1.2088		1.8049	220.06	-0.091047
	2.3786	586.94	3.988		4.3053	662.77	0.71392		2.3786	144.53	0.14988
	3.1224	642.18	5.0432		5.7043	840.9	1.9401		3.1224	121.98	0.42106
	4.3053	701.26	3.3314		7.3322	1126	1.7111		4.3053	521.34	0.78861
	5.7043	957.21	5.7941		8.747	1214.5	1.9039		5.7043	328.2	2.2093
	7.3322	1159.3	6.7237		9.74	1309.4	1.6708		7.3322	437.1	1.8406
	8.747	1703.5	5.7342		1.0369	12.768	0.1235		8.747	388.69	3.4466
	9.74	2110.2	8.526		1.1152	-15.879	0.3443		9.74	381.12	3.4929
	1.0369	557.63	1.0218		1.4002	38.145	0.061708		1.0369	249.97	0.97614
	1.1152	483.09	0.39193		1.8049	-140.78	0.39463		1.1152	254.14	0.75056
	1.4002	468.49	1.0024		2.3786	-105.91	-0.033391		1.4002	225.3	1.4687
	1.8049	558.48	0.87889		3.1224	-81.947	0.22748		1.8049	272.45	1.4714
	2.3786	548.46	0.79803		4.3053	298.3	0.72071		2.3786	242.46	1.7258
	3.1224	672.33	0.5506		5.7043	182.3	2.2083		3.1224	319.46	0.88139
	4.3053	557.58	0.23283		7.3322	352.19	2.1898		4.3053	285.27	1.817
	5.7043	773.87	1.1871		8.747	368.72	3.285		5.7043	309.32	2.6897
	7.3322	842.72	1.427		9.74	451.45	2.4202		7.3322	339.05	3.6652
	8.747	1468.9	1.7203		1.0369	695.36	-0.2323		8.747	365.52	4.0562
	9.74	1567.3	1.9547		1.1152	673.53	2.8558		9.74	332.51	4.7247
	1.0369	165.08	0.32849		1.4002	638.05	3.6023		1.0369	260.03	0.17934
	1.1152	118.22	0.57265		1.8049	658.7	2.5279		1.1152	255.59	0.11247
	1.4002	119.89	-0.074425		2.3786	752	2.0401		1.4002	325.64	0.24154
	1.8049	126.68	0.26627		3.1224	743.96	2.7066		1.8049	391.14	0.14673
	2.3786	103.94	0.15983		4.3053	1210.9	1.8882		2.3786	415.41	0.25399
	3.1224	129.34	0.25273		5.7043	1450.5	1.7316		3.1224	376.46	0.086608
	4.3053	137.11	1.2159		7.3322	1654.3	1.6355		4.3053	400.71	0.84633
	5.7043	226.75	2.1705		8.747	1870.6	1.9135		5.7043	439.09	0.92464
	7.3322	283.09	2.1019		9.74	1991.1	2.1818		7.3322	540.24	1.0361
	8.747	320.85	2.3674		1.0369	226.22	0.97541		8.747	637.67	1.7362
	9.74	368.45	2.3589		1.1152	167.86	1.3782		9.74	664.9	1.0863
	1.0369	187.1	0.44108		1.4002	294.81	0.69625		1.0369	360.91	1.25
	1.1152	90.705	0.30869		1.8049	79.21	0.53716		1.1152	285.32	0.56787
	1.4002	53.884	0.50289		2.3786	121.82	1.4235		1.4002	360.92	0.6605
	1.8049	5.0192	0.25136		3.1224	120.42	1.5674		1.8049	376.11	0.78318
	2.3786	88.645	0.30741		4.3053	540.6	2.5818		2.3786	423.31	0.85579
	3.1224	74.958	0.5904		5.7043	462.21	3.4287		3.1224	539.8	0.78643
	4.3053	129.2	2.7445		7.3322	550.86	3.6483		4.3053	367.9	1.7954
	5.7043	137.31	3.8043		8.747	581.88	4.1646		5.7043	576.11	2.1497
	7.3322	123.97	3.4894		9.74	592.46	4.6285		7.3322	536.61	2.5471
	8.747	93.522	3.2862		1.0369	389.75	1.7128		8.747	623.07	2.7574
	9.74	154.67	3.0481		1.1152	313.08	2.1521		9.74	572.4	3.4329
	1.0369	35.154	-0.096269		1.4002	429.33	1.6072		1.0369	482.04	2.1849
	1.1152	18.574	0.29096		1.8049	231.01	1.7782		1.1152	417.62	1.0164
	1.4002	33.535	0.59037		2.3786	338.22	1.6881		1.4002	428.83	1.8449
	1.8049	41.698	0.52312		3.1224	388.37	1.0959		1.8049	366.62	1.7122
	2.3786	47.161	0.13898		4.3053	864.54	2.5287		2.3786	355.23	2.3401
	3.1224	68.262	0.32016		5.7043	1089.2	4.4753		3.1224	417.3	1.6042
	4.3053	102.02	2.9854		7.3322	1134.3	3.8711		4.3053	531.61	2.2663
	5.7043	124.57	3.2785		8.747	1493.4	5.1338		5.7043	578.36	2.8776
	7.3322	113.28	3.406		9.74	1460.3	5.8345		7.3322	530.94	3.7865
	8.747	90.665	4.5405		1.0369	72.453	0.074576		8.747	533.49	5.0255
	9.74	74.795	4.132		1.1152	-31.658	0.090827		9.74	478.12	3.0154
	1.0369	4.3545	0.79944		1.4002	-34.332	0.23792		1.0369	67.922	1.1812
	1.1152	-7.6171	0.36181		1.8049	-10.262	-0.091316		1.1152	76.908	0.22783
	1.4002	-5.726	0.36378		2.3786	29.455	-0.018607		1.4002	18.606	1.7938
	1.8049	0.57072	0.20921		3.1224	59.099	0.19796		1.8049	26.107	0.85829
	2.3786	19.07	0.39462		4.3053	172.82	0.63602		2.3786	0.64373	0.7597
	3.1224	14.938	0.58571		5.7043	177.68	0.8785		3.1224	87.678	1.2819
	4.3053	37.034	4.9136		7.3322	148.71	1.7895		4.3053	99.536	4.1487
	5.7043	51.718	4.9957		8.747	219.32	1.9859		5.7043	100.33	4.6375
	7.3322	76.047	7.4909		9.74	200.71	2.505		7.3322	35.937	7.6876
	8.747	130.01	9.2947		1.0369	1013.2	4.5597		8.747	38.562	7.2593
	9.74	142.09	7.5777		1.1152	941.97	3.9927		9.74	70.519	6.2936
	1.0369	104.08	-0.18641		1.4002	902.52	5.1562		1.0369	591.24	-1.0907
	1.1152	105.76	0.18508		1.8049	1024.5	3.3508		1.1152	559.78	-0.343
	1.4002	67.616	0.12924		2.3786	1038.8	3.1005		1.4002	482.48	0.69059
	1.8049	95.178	0.058545		3.1224	1181.2	4.3179		1.8049	559.39	0.69796
	2.3786	113.67	0.14339		4.3053	1214	4.7389		2.3786	578.8	0.54258
	3.1224	115.51	0.79603		5.7043	1483.4	6.89		3.1224	565.35	0.66028
	4.3053	103.54	2.4972		7.3322	1861.1	9.178		4.3053	666.57	0.87984
	5.7043	214.47	3.6871		8.747	2118.6	7.4713		5.7043	722.45	0.83005
	7.3322	122.55	3.3624		9.74	2080.8	8.168		7.3322	807.78	2.4341
	8.747	140.7	3.4787		1.0369	386.77	0.98129		8.747	826.9	3.547
	9.74	222.63	2.5986		1.1152	271.5	1.0145		9.74	1182.9	2.9269
	1.0369	42.544	1.2991		1.4002	241.5	1.239		1.0369	235.14	0.066453
	1.1152	14.537	1.4292		1.8049	203.24	1.693		1.1152	407.91	-0.080814
	1.4002	14.884	1.2551		2.3786	401.93	1.145		1.4002	19.012	0.22155
	1.8049	30.424	1.8776		3.1224	453.86	1.5828		1.8049	75.906	0.48768
	2.3786	53.971	2.5449		4.3053	777.78	1.6163		2.3786	89.903	0.96793
	3.1224	63.264	3.0991		5.7043	905.66	3.5667		3.1224	197.92	1.9643
	4.3053	124.18	1.8829		7.3322	1269.1	4.3598		4.3053	386.29	1.1985
	5.7043	148.91	3.6544		8.747	1502.1	3.5296		5.7043	556.76	1.1785
	7.3322	179.08	4.0278		9.74	1455.4	5.3561		7.3322	677.46	1.8793
	8.747	236.57	3.0456		1.0369	592.17	0.93045		8.747	648.26	2.6556
	9.74	266.74	5.0723		1.1152	663.11	1.9724		9.74	961.92	4.1818
	1.0369	238.92	0.93391		1.4002	670.6	1.3063		1.0369	797.88	-0.44514
	1.1152	230.26	0.9337		1.8049	791.31	1.7918		1.1152	780.88	0.074773
	1.4002	314.67	-0.10996		2.3786	775.01	1.5662		1.4002	456.11	0.23276
	1.8049	336.43	1.0082		3.1224	1005.3	1.0481		1.8049	461.6	0.42142
	2.3786	297.8	1.3115		4.3053	1196.6	1.6589		2.3786	468.63	0.70096
	3.1224	311.57	1.8372		5.7043	963.93	2.3524		3.1224	561.7	0.96215
	4.3053	530.67	2.9912		7.3322	1289.8	3.1926		4.3053	766.52	1.718
	5.7043	537.57	4.219		8.747	1905.5	2.9856		5.7043	841.49	1.4971
	7.3322	660.73	3.6697		9.74	2101.8	3.3214		7.3322	840.26	1.924
	8.747	851.42	2.9239		1.0369	457.1	0.10014		8.747	1069	1.5725
	9.74	1068.1	5.1039		1.1152	193.15	0.15601		9.74	1014.3	3.564
	1.0369	60.361	0.1401		1.4002	224.94	-0.14831		1.0369	239.25	1.3508
	1.1152	66.698	-0.0083878		1.8049	213.71	0.035427		1.1152	141.8	0.23498
	1.4002	62.639	0.22046		2.3786	228.17	-0.14011		1.4002	155.4	1.3878
	1.8049	70.329	0.074086		3.1224	299.72	-0.1134		1.8049	185.7	0.70208
	2.3786	38.933	0.20273		4.3053	666.1	2.9036		2.3786	218.26	0.39563
	3.1224	58.535	0.28761		5.7043	821.49	2.7061		3.1224	141.63	2.0422
	4.3053	173.89	1.5554		7.3322	992.93	4.2784		4.3053	217.74	2.6338
	5.7043	134.13	2.0435		8.747	1365.6	3.6107		5.7043	272.48	3.7169
	7.3322	124.28	2.4874		9.74	1341	4.8249		7.3322	285.29	3.3124
	8.747	152.3	2.819		1.0369	-2.7632	1.0296		8.747	311.9	2.3107
	9.74	175.5	3.2577		1.1152	197.95	0.94181		9.74	384.88	4.0651
	1.0369	20.804	0.82066		1.4002	250.89	0.62696		1.0369	20.795	0.32381
	1.1152	0.62715	0.94754		1.8049	404.83	0.6698		1.1152	-14.982	-0.60435
	1.4002	-25.773	0.78908		2.3786	318.78	-0.23177		1.4002	28.281	0.21444
	1.8049	-70.963	0.41025		3.1224	540.02	0.85175		1.8049	66.984	-0.1036
	2.3786	-76.126	0.48056		4.3053	546.9	2.2704		2.3786	84.401	0.44074
	3.1224	-99.511	0.28256		5.7043	676.7	1.8723		3.1224	140.84	0.42032
	4.3053	63.332	2.7728		7.3322	1102.8	2.4882		4.3053	64.372	1.1438
	5.7043	14.874	3.1108		8.747	1246.7	2.3039		5.7043	150.96	0.71089
	7.3322	-31.019	4.8048		9.74	1093.3	1.7747		7.3322	207.69	3.1852
	8.747	-46.486	2.5238		1.0369	86.941	0.69247		8.747	229.72	2.5068
	9.74	-29.182	3.5762		1.1152	57.933	0.62454		9.74	237.19	2.6782
	1.0369	96.525	0.11723		1.4002	-19.685	-0.10373		1.0369	-80.638	0.6477
	1.1152	114.23	0.2246		1.8049	-7.0245	0.33783		1.1152	-109.24	0.31463
	1.4002	129.86	0.42342		2.3786	-60.269	0.45592		1.4002	-96.279	0.56893
	1.8049	137.34	0.3238		3.1224	27.325	0.28781		1.8049	-150.27	0.52863
	2.3786	147.27	0.21495		4.3053	118.29	1.1241		2.3786	-84.784	0.61353
	3.1224	151.02	0.30593		5.7043	125.32	2.0108		3.1224	-88.754	1.0407
	4.3053	190.56	1.7782		7.3322	168.97	3.6147		4.3053	-111.46	2.1408
	5.7043	204.94	2.0905		8.747	208.31	3.3783		5.7043	-98.732	2.986
	7.3322	213.65	3.5595		9.74	360.95	2.6143		7.3322	-37.098	3.9212
	8.747	179.44	1.733		1.0369	587.3	1.1789		8.747	-7.2363	5.9422
	9.74	252.36	1.5111		1.1152	579.55	0.50955		9.74	-46.575	4.699
	1.0369	434.24	0.25388		1.4002	651	2.0641		1.0369	947.45	2.3508
	1.1152	418.09	0.60816		1.8049	619.99	2.0011		1.1152	1067.8	2.7017
	1.4002	418.37	0.44339		2.3786	692.56	2.4966		1.4002	1313.2	2.7012
	1.8049	408.03	0.40319		3.1224	749.03	3.2117		1.8049	1324.2	2.5079
	2.3786	467.14	0.86048		4.3053	948.03	2.7406		2.3786	1447.6	4.3045
	3.1224	479.43	0.92205		5.7043	1165.8	2.5606		3.1224	1506.2	3.8647
	4.3053	729.12	0.29719		7.3322	1259.8	6.4735		4.3053	1330.4	1.985
	5.7043	918.89	1.3806		8.747	1422.4	5.9465		5.7043	1188.8	2.5787
	7.3322	1071.4	2.1943		9.74	1593.1	4.3335		7.3322	1350.3	0.66764
	8.747	1246	1.9452		1.0369	592.49	1.049		8.747	1434.2	0.55542
	9.74	1157.7	2.0717		1.1152	535.76	1.1229		9.74	1681.7	0.68512
	1.0369	111.53	0.64037		1.4002	480.96	0.77997		1.0369	263.33	0.38506
	1.1152	132.63	0.34488		1.8049	360.49	1.7771		1.1152	190.73	-0.377
	1.4002	87.369	0.6441		2.3786	438.18	1.9043		1.4002	74.985	0.2625
	1.8049	134.48	0.56111		3.1224	457.48	0.73073		1.8049	255.48	0.51246
	2.3786	135.04	0.72208		4.3053	700.5	1.3445		2.3786	102.58	0.47026
	3.1224	163.14	0.76868		5.7043	757.27	2.2797		3.1224	216.85	0.63168
	4.3053	230.32	1.0527		7.3322	735.32	2.5296		4.3053	303.11	1.0815
	5.7043	297.35	1.4107		8.747	806.5	3.1428		5.7043	213.94	1.243
	7.3322	335.89	1.9128		9.74	786.25	2.5906		7.3322	309.36	1.6344
	8.747	365.35	1.9314		1.0369	-17.918	0.50359		8.747	331.77	2.2819
	9.74	488.21	2.307		1.1152	2.8844	0.42363		9.74	248.08	1.8252
	1.0369	40.653	0.21133		1.4002	4.8702	0.07831		1.0369	-63.487	0.29368
	1.1152	-0.12394	0.14402		1.8049	8.7556	0.26021		1.1152	375.07	0.4985
	1.4002	17.96	0.22177		2.3786	39.662	0.28094		1.4002	270.86	0.4078
	1.8049	1.249	0.24441		3.1224	-0.90186	0.44325		1.8049	593.44	0.38701
	2.3786	20.132	0.49184		4.3053	123.49	1.839		2.3786	523.64	0.053518
	3.1224	20.034	0.33561		5.7043	103.12	3.0873		3.1224	660.32	0.49839
	4.3053	37.957	0.81582		7.3322	165.24	3.1228		4.3053	685.01	0.26534
	5.7043	83.534	1.5088		8.747	149.41	3.9291		5.7043	627.92	0.5571
	7.3322	123.39	1.4605		9.74	170	4.3383		7.3322	775.69	1.3578
	8.747	82.48	1.6899		1.0369	985.59	0.51735		8.747	776.62	1.4789
	9.74	122.37	1.9063		1.1152	927.58	-0.058638		9.74	1125.1	1.4915
	1.0369	630.65	1.5224		1.4002	940.88	0.21276		1.0369	354.32	1.4997
	1.1152	615.94	1.4952		1.8049	823.52	0.2451		1.1152	375.83	1.3904
	1.4002	638.32	1.5709		2.3786	820.91	0.43015		1.4002	512.46	1.8263
	1.8049	666.75	2.0967		3.1224	717.93	0.10033		1.8049	504.17	2.2059
	2.3786	668.63	1.9655		4.3053	1136.5	0.70045		2.3786	604.47	2.8935
	3.1224	744.55	2.2589		5.7043	1294	0.99959		3.1224	585.87	1.9903
	4.3053	896.39	1.8263		7.3322	1480.3	0.87434		4.3053	546.01	2.1504
	5.7043	1064.1	2.1793		8.747	1386.8	0.97465		5.7043	667.07	3.5843
	7.3322	1401.1	3.1635		9.74	1500.3	1.0479		7.3322	685.52	4.1015
	8.747	1795.5	3.9478		1.0369	595.53	0.084762		8.747	751.27	2.6811
	9.74	1806.3	3.6704		1.1152	509.27	0.84326		9.74	704.59	5.1719
	1.0369	435.85	0.94042		1.4002	480.85	0.51517		1.0369	604.76	1.9329
	1.1152	331.49	0.62956		1.8049	438.06	0.60159		1.1152	651.56	1.7155
	1.4002	335.81	1.8106		2.3786	448.27	0.70907		1.4002	718.93	1.8752
	1.8049	479.14	0.53464		3.1224	511.51	0.5397		1.8049	776.25	1.2066
	2.3786	475.52	0.98161		4.3053	690.86	0.8412		2.3786	714.05	2.093
	3.1224	606.38	1.916		5.7043	683.17	1.467		3.1224	954.86	1.7887
	4.3053	623.46	0.84072		7.3322	747.28	1.972		4.3053	922.69	1.9589
	5.7043	927.2	1.2058		8.747	644.83	3.0277		5.7043	918	1.5239
	7.3322	1294.2	2.3645		9.74	686.23	3.416		7.3322	1123.7	2.3261
	8.747	1624.5	2.8357		1.0369	59.859	0.57925		8.747	1264.9	2.3076
	9.74	1822.2	3.5597		1.1152	-3.3017	0.40241		9.74	1445.7	2.1696
	1.0369	48.798	0.42095		1.4002	13.164	0.40958		1.0369	724.23	1.0738
	1.1152	51.027	0.63597		1.8049	17.785	0.39064		1.1152	658.6	0.83586
	1.4002	70.07	0.58469		2.3786	8.2603	0.41314		1.4002	593.42	1.4834
	1.8049	145.97	0.41984		3.1224	15.055	0.45542		1.8049	590.15	0.85847
	2.3786	141.76	0.4108		4.3053	103.86	1.0972		2.3786	656.09	0.65187
	3.1224	171.85	0.61553		5.7043	36.95	1.6323		3.1224	620.52	1.821
	4.3053	41.999	3.0749		7.3322	111.14	1.4351		4.3053	794.56	1.2939
	5.7043	45.658	5.8855		8.747	42.677	1.4149		5.7043	698.45	1.5745
	7.3322	102.49	7.149		9.74	24.009	1.0545		7.3322	834.6	2.4876
	8.747	32.889	7.5397		1.0369	1599.3	-0.083559		8.747	927.67	3.7205
	9.74	134.59	2.7289		1.1152	1678.6	0.34182		9.74	936.84	4.151
	1.0369	493.85	2.1256		1.4002	1818.9	0.67809		1.0369	110.06	0.44903
	1.1152	319.19	1.7848		1.8049	1593	0.39152		1.1152	70.608	0.15498
	1.4002	258.13	2.1539		2.3786	1431.6	0.41749		1.4002	88.213	0.61007
	1.8049	276.75	1.03		3.1224	1555	0.37116		1.8049	92.106	0.64344
	2.3786	305.84	2.1353		4.3053	1991.9	0.40284		2.3786	120.42	0.78733
	3.1224	451.3	3.7127		5.7043	2119	0.5592		3.1224	132.76	1.6644
	4.3053	458.58	1.8532		7.3322	2428.9	0.57079		4.3053	125.18	1.6856
	5.7043	626.29	2.9118		8.747	2375.5	0.20627		5.7043	130.55	3.0467
	7.3322	606.68	2.4186		9.74	2922.2	0.61272		7.3322	138.45	4.2736
	8.747	865.72	3.7353		1.0369	-122.34	1.251		8.747	136.38	4.5843
	9.74	1310.2	2.333		1.1152	-212.28	1.0793		9.74	184.73	4.2097
	1.0369	155.54	0.36268		1.4002	-170.33	1.0405		1.0369	244.63	1.8725
	1.1152	177.78	0.49516		1.8049	-187.37	1.4453		1.1152	181.35	1.8467
	1.4002	129.43	0.56139		2.3786	-145.1	1.8201		1.4002	193.16	2.1823
	1.8049	131.98	0.36532		3.1224	-123.57	1.3398		1.8049	176.71	2.2359
	2.3786	153.82	0.47032		4.3053	-96.594	1.6978		2.3786	191.78	1.8952
	3.1224	158.78	0.51748		5.7043	-40.803	0.60871		3.1224	256.22	1.7123
	4.3053	323.33	1.1005		7.3322	-129.61	1.8038		4.3053	395.36	2.6341
	5.7043	327.61	1.8047		8.747	-90.798	1.396		5.7043	460.3	2.7149
	7.3322	383.05	2.003		9.74	-93.758	3.2958		7.3322	532.32	2.2156
	8.747	481.29	1.9349		1.0369	224.23	-0.20233		8.747	592.31	3.2503
	9.74	450.84	1.8973		1.1152	289.64	-0.38467		9.74	594.63	3.6374
	1.0369	-27.551	1.2313		1.4002	277.66	0.0096291		1.0369	2.2825	1.5034
	1.1152	10.788	0.74195		1.8049	295.67	-0.055415		1.1152	6.7373	0.92017
	1.4002	-28.643	1.6921		2.3786	247.81	-0.029778		1.4002	21.705	1.5809
	1.8049	-4.6885	1.0147		3.1224	288.53	0.14578		1.8049	24.557	1.4431
	2.3786	27.263	0.74415		4.3053	454.36	0.35624		2.3786	46.14	1.0713
	3.1224	-3.6577	1.0671		5.7043	515.2	0.47541		3.1224	85.561	2.4525
	4.3053	16.26	1.2203		7.3322	596.83	0.57505		4.3053	151.93	2.4163
	5.7043	-4.265	2.0447		8.747	598.06	0.86602		5.7043	187.25	2.2822
	7.3322	12.714	1.1185		9.74	623.07	1.1424		7.3322	209.04	2.9957
	8.747	81.373	1.5892		1.0369	416.73	2.0871		8.747	202.13	2.972
	9.74	36.919	2.3658		1.1152	467.58	1.4804		9.74	196.46	4.355
	1.0369	108.24	0.67438		1.4002	543.32	2.412		1.0369	-59.152	1.017
	1.1152	114.3	0.69542		1.8049	535.17	1.7777		1.1152	-79.913	1.5952
	1.4002	164.39	0.74619		2.3786	495.13	2.3751		1.4002	-86.059	1.2478
	1.8049	209.45	0.65435		3.1224	604.6	1.6969		1.8049	-78.067	1.8662
	2.3786	218.74	0.49901		4.3053	766.52	2.1948		2.3786	-91.073	2.6598
	3.1224	254.7	0.97829		5.7043	773.68	2.0681		3.1224	-81.006	0.18291
	4.3053	272.27	1.0529		7.3322	982.52	1.7877		4.3053	-64.986	1.2316
	5.7043	357.73	1.5077		8.747	1017	2.1359		5.7043	-23.11	3.384
	7.3322	423.6	1.6789		9.74	1109.2	2.6216		7.3322	-65.407	3.7882
	8.747	547.57	1.9851		1.0369	455.13	0.32274		8.747	-62.602	2.9677
	9.74	603.73	2.2917		1.1152	379.68	0.36372		9.74	-5.0064	1.9471
	1.0369	-2.1421	0.44642		1.4002	520	1.6039		1.0369	35.958	0.40112
	1.1152	-0.79719	0.44537		1.8049	497.22	0.86718		1.1152	60.656	-0.12599
	1.4002	20.521	0.42645		2.3786	302.06	0.76641		1.4002	39.288	-0.77471
	1.8049	6.4411	1.4691		3.1224	421.94	0.58542		1.8049	61.534	-0.13656
	2.3786	5.8079	0.47086		4.3053	676.1	1.1901		2.3786	120.26	1.0749
	3.1224	5.3701	0.47954		5.7043	653.36	1.8525		3.1224	114.69	1.2393
	4.3053	75.748	1.7282		7.3322	819.31	1.832		4.3053	162.72	6.1695
	5.7043	77.07	2.1707		8.747	797.36	2.2743		5.7043	189.73	5.1549
	7.3322	71.211	2.745		9.74	810.49	2.7967		7.3322	239.35	8.2488
	8.747	102.56	2.369		1.0369	-187.24	2.022		8.747	295.86	6.6472
	9.74	41.307	3.5567		1.1152	-127.39	0.37271		9.74	283.6	8.431
	1.0369	107.14	0.44139		1.4002	-317.05	0.32785		1.0369	190.88	0.67523
	1.1152	60.312	0.095607		1.8049	-319.61	0.73003		1.1152	196.65	0.20483
	1.4002	100.02	0.4431		2.3786	-385.83	0.78073		1.4002	206.35	0.331
	1.8049	107.58	0.16542		3.1224	-329.83	0.43871		1.8049	176.08	0.46594
	2.3786	128.47	0.27822		4.3053	-271.14	4.8853		2.3786	228.95	0.73336
	3.1224	155.78	0.73912		5.7043	-259.42	6.1799		3.1224	212.72	0.72532
	4.3053	265.49	1.2834		7.3322	-337.17	6.9007		4.3053	377.29	1.1601
	5.7043	378.72	3.0962		8.747	-266.44	5.3651		5.7043	370.79	1.9582
	7.3322	292.67	3.142		9.74	-194.03	5.3241		7.3322	458.7	2.5669
	8.747	403.3	2.9049		1.0369	-36.148	0.79729		8.747	503.91	3.5579
	9.74	474.35	3.183		1.1152	-116.7	0.31212		9.74	466.71	2.5578
	1.0369	95.093	0.40921		1.4002	-271.68	0.57413		1.0369	1145.3	1.4787
	1.1152	89.975	-0.63658		1.8049	-220.42	0.53071		1.1152	1218	1.6095
	1.4002	86.521	1.1641		2.3786	-292.59	0.57591		1.4002	1310.9	1.2134
	1.8049	29.168	0.35818		3.1224	-186.55	0.75535		1.8049	1513.5	1.8044
	2.3786	51.159	1.5543		4.3053	64.397	0.69172		2.3786	1561.7	2.1167
	3.1224	33.288	0.33138		5.7043	-165.77	0.96129		3.1224	1799.9	1.4908
	4.3053	219.04	1.5948		7.3322	-89.162	1.8329		4.3053	1555.1	1.185
	5.7043	192.76	2.8674		8.747	-103.55	1.1689		5.7043	1703.7	0.5379
	7.3322	305.66	4.6892		9.74	-89.347	0.56715		7.3322	2179.9	0.17259
	8.747	178.66	3.1919		1.0369	18.143	0.32395		8.747	2578.5	1.4372
	9.74	198.9	4.7013		1.1152	108.48	0.30365		9.74	2709.7	2.753
	1.0369	-0.11517	1.5475		1.4002	232.96	0.32235		1.0369	-52.187	0.30949
	1.1152	10.341	1.4814		1.8049	246.43	0.46541		1.1152	-103.23	0.06077
	1.4002	35.422	1.669		2.3786	165.05	0.027838		1.4002	-182.97	0.15056
	1.8049	50.133	1.5844		3.1224	227.53	0.21827		1.8049	-216.31	0.16962
	2.3786	52.703	1.3606		4.3053	108.84	0.54576		2.3786	-156.73	0.23101
	3.1224	55.725	1.0259		5.7043	134.36	1.7596		3.1224	-140.54	0.21054
	4.3053	83.373	1.668		7.3322	131.04	1.7495		4.3053	-23.596	0.46472
	5.7043	52.633	3.2003		8.747	126.58	4.9146		5.7043	-49.262	3.0732
	7.3322	153.5	4.738		9.74	206.29	1.6369		7.3322	-27.56	4.2935
	8.747	174.05	5.9618		1.0369	-175.77	0.735		8.747	-22.669	4.0648
	9.74	148.82	7.3482		1.1152	37.415	0.52941		9.74	-40.772	1.9278
	1.0369	88.501	0.67868		1.4002	-101.56	1.1202		1.0369	11.853	0.65151
	1.1152	100.77	0.55555		1.8049	-40.786	0.73903		1.1152	38.79	0.61734
	1.4002	90.726	0.29983		2.3786	-90.895	0.52847		1.4002	-9.6033	0.40392
	1.8049	105.78	0.35696		3.1224	-66.733	0.85077		1.8049	-23.87	0.35423
	2.3786	85.602	0.30526		4.3053	-190.34	1.7881		2.3786	10.779	0.57236
	3.1224	111.03	0.43288		5.7043	-4.8128	3.4937		3.1224	70.142	0.55367
	4.3053	243.81	0.77338		7.3322	25.865	3.1199		4.3053	61.475	0.78344
	5.7043	222.13	2.4364		8.747	106.22	2.5654		5.7043	142.91	2.1922
	7.3322	259.36	3.3156		9.74	54.92	2.4562		7.3322	161.22	3.3147
	8.747	320.79	3.5487		1.0369	328.66	1.1586		8.747	149.41	4.4181
	9.74	342.21	3.6221		1.1152	372.18	0.74007		9.74	157.53	4.2206
	1.0369	353.68	1.4217		1.4002	432.29	1.4825		1.0369	41.597	0.089519
	1.1152	364.7	2.1892		1.8049	407.46	1.6127		1.1152	-11.329	0.043831
	1.4002	344.44	1.9252		2.3786	434.45	0.94901		1.4002	51.659	0.55293
	1.8049	359.58	2.6557		3.1224	512.62	1.0303		1.8049	77.486	2.4398
	2.3786	418.3	1.8629		4.3053	454.78	1.1035		2.3786	150.84	-0.21406
	3.1224	434.79	1.8432		5.7043	482.11	1.5594		3.1224	155.24	1.9892
	4.3053	509.49	3.3318		7.3322	582.26	1.6974		4.3053	107.69	0.86958
	5.7043	734.95	4.7732		8.747	557.13	2.1984		5.7043	270.78	3.5734
	7.3322	852.34	3.784		9.74	613.99	1.7426		7.3322	254.62	4.8766
	8.747	995.99	4.7769		1.0369	-41.545	0.41511		8.747	212.48	5.7388
	9.74	1177.9	7.0868		1.1152	-86.737	-0.15607		9.74	258.91	6.431
	1.0369	154.19	0.61877		1.4002	34.238	0.20724		1.0369	188.51	-0.46304
	1.1152	143.7	0.67746		1.8049	-17.472	0.34694		1.1152	247.3	0.39226
	1.4002	131.97	0.77		2.3786	-179.15	0.024188		1.4002	204.84	0.47714
	1.8049	143.84	0.64914		3.1224	0.039851	0.17195		1.8049	199.22	0.39314
	2.3786	156.08	0.78452		4.3053	35.702	1.4987		2.3786	267.28	0.54203
	3.1224	187.41	0.55447		5.7043	-28.645	2.1121		3.1224	235.45	0.68787
	4.3053	197.93	1.4027		7.3322	-64.94	3.7593		4.3053	333.81	0.41002
	5.7043	312.03	3.2591		8.747	-22.538	3.7547		5.7043	356.92	0.65161
	7.3322	343.67	2.442		9.74	24.862	5.349		7.3322	515.18	0.50096
	8.747	370.05	3.656		1.0369	418.51	0.10947		8.747	496.67	0.32721
	9.74	344.72	3.6112		1.1152	254.72	1.5803		9.74	613.98	0.41347
	1.0369	13.975	2.4622		1.4002	262.47	1.8381		1.0369	56.855	0.73227
	1.1152	26.852	1.0264		1.8049	272.41	1.7355		1.1152	-11.624	0.77646
	1.4002	14.5	0.52304		2.3786	377.39	1.2311		1.4002	3.2153	0.69924
	1.8049	23.297	0.92805		3.1224	460.75	1.1279		1.8049	48.439	0.20198
	2.3786	27.823	1.2276		4.3053	506.97	1.9159		2.3786	98.528	0.6601
	3.1224	53.927	0.50271		5.7043	412.29	2.6732		3.1224	26.428	1.8311
	4.3053	87.475	0.95378		7.3322	538.36	1.6271		4.3053	-50.499	1.4466
	5.7043	119.18	2.2082		8.747	654.56	1.7635		5.7043	-22.785	3.9078
	7.3322	163.95	5.6481		9.74	973.6	2.1873		7.3322	75.36	5.7045
	8.747	280.63	6.2689		1.0369	378.07	0.09608		8.747	30.342	6.6573
	9.74	230.07	4.5104		1.1152	433.39	0.085307		9.74	37.585	8.4333
	1.0369	41.363	0.56979		1.4002	253.21	-0.50601		1.0369	193.94	0.17155
	1.1152	29.739	0.43413		1.8049	-3.8993	0.21114		1.1152	218.93	0.12653
	1.4002	51.013	0.0066605		2.3786	39.371	0.0022764		1.4002	277.73	0.24803
	1.8049	46.23	0.054338		3.1224	-65.067	-0.0077639		1.8049	292.93	0.37803
	2.3786	43.897	0.52941		4.3053	278.46	1.5786		2.3786	314.22	0.85615
	3.1224	51.873	0.44881		5.7043	399.06	3.7324		3.1224	378.19	0.25124
	4.3053	92.523	2.2715		7.3322	185.66	1.9369		4.3053	359.05	0.71595
	5.7043	160.32	4.4393		8.747	286.94	1.8429		5.7043	430.94	1.1102
	7.3322	215.61	7.1921		9.74	172.34	0.46445		7.3322	600.97	1.7081
	8.747	246.03	6.7819		1.0369	140.29	0.18931		8.747	547.67	1.4737
	9.74	211.39	7.2652		1.1152	-59.387	0.43517		9.74	673.16	1.4514
	1.0369	68.929	0.70471		1.4002	-107.4	0.077009		1.0369	204.54	1.6335
	1.1152	50.38	1.0079		1.8049	-100.8	0.31691		1.1152	182.89	1.5174
	1.4002	40.923	-0.0068096		2.3786	-82.739	0.16306		1.4002	208.27	0.78059
	1.8049	35.86	0.6564		3.1224	-66.771	0.40611		1.8049	320.46	1.0457
	2.3786	45.878	0.63484		4.3053	127.84	1.7976		2.3786	317.42	2.1144
	3.1224	60.122	0.71362		5.7043	30.916	1.1839		3.1224	216.31	1.5549
	4.3053	97.418	5.022		7.3322	-40.335	1.5908		4.3053	334.5	1.241
	5.7043	145.05	8.0095		8.747	7.014	0.90345		5.7043	499.44	2.4816
	7.3322	149.31	8.4329		9.74	68.192	1.637		7.3322	666.03	2.6354
	8.747	151.58	6.6896		1.0369	92.857	0.31099		8.747	745.74	3.0761
	9.74	145.85	6.4517		1.1152	86.481	0.56222		9.74	710.16	3.3602
	1.0369	46.563	0.40642		1.4002	58.642	0.52366		1.0369	1135.6	0.77584
	1.1152	-12.091	0.31592		1.8049	134.36	0.8467		1.1152	1006	-2.265
	1.4002	-18.732	0.19672		2.3786	109.95	0.63779		1.4002	1006.4	-0.95963
	1.8049	-25.888	0.45554		3.1224	102	0.58355		1.8049	999.7	0.21436
	2.3786	1.4309	0.68282		4.3053	96.143	1.0345		2.3786	825.91	0.85199
	3.1224	-17.824	0.5808		5.7043	152.83	2.231		3.1224	976.4	-0.069994
	4.3053	21.762	5.6101		7.3322	176.9	3.9346		4.3053	1176.3	1.0008
	5.7043	31.628	7.446		8.747	256.46	3.6799		5.7043	1340.7	-0.10363
	7.3322	67.277	6.4898		9.74	243.14	4.321		7.3322	1397.3	1.3409
	8.747	63.047	6.8558		1.0369	143.31	0.45816		8.747	1354.2	0.83811
	9.74	55.053	4.9957		1.1152	118.19	0.5496		9.74	1596.5	1.7945
	1.0369	22.045	1.5925		1.4002	82.483	-0.20242		1.0369	206.33	0.27555
	1.1152	62.745	0.97284		1.8049	128.89	1.0124		1.1152	199.86	0.49536
	1.4002	47.07	1.8963		2.3786	160.64	0.42103		1.4002	204.91	1.853
	1.8049	52.607	1.7906		3.1224	140.05	1.1003		1.8049	200.92	3.516
	2.3786	73.376	2.8685		4.3053	221.05	0.062584		2.3786	161.81	1.6621
	3.1224	75.393	1.428		5.7043	261.6	2.2013		3.1224	175.77	4.2892
	4.3053	128.6	2.3114		7.3322	273.53	2.1463		4.3053	361.63	1.4577
	5.7043	213.47	2.9895		8.747	336.46	7.7907		5.7043	332.16	4.142
	7.3322	330.46	2.7905		9.74	326.84	6.6682		7.3322	354.79	6.0239
	8.747	267.33	1.989		1.0369	51.906	1.725		8.747	352.17	5.4799
	9.74	450.86	3.4647		1.1152	74.907	1.4305		9.74	301.89	5.2593
	1.0369	116.75	5.3672		1.4002	73.839	1.2373		1.0369	235.94	0.61561
	1.1152	101.23	7.1783		1.8049	56.004	2.0936		1.1152	172.68	0.043747
	1.4002	168.06	6.7135		2.3786	101.67	2.1793		1.4002	228.07	-0.047328
	1.8049	123.14	11.997		3.1224	41.025	2.2681		1.8049	320.32	0.75438
	2.3786	151.04	9.1225		4.3053	196.62	3.3889		2.3786	318.69	0.3298
	3.1224	198.75	6.5652		5.7043	193.42	3.8297		3.1224	336.99	0.70002
	4.3053	216.71	7.0211		7.3322	223.56	3.7544		4.3053	407.77	0.47012
	5.7043	304.46	8.0137		8.747	181.71	3.4498		5.7043	497.54	0.93651
	7.3322	387.64	9.1342		9.74	225.46	4.0354		7.3322	639.51	1.165
	8.747	494.33	9.9836		1.0369	135.51	1.1846		8.747	644.55	1.1601
	9.74	524.61	11.974		1.1152	173.71	1.4358		9.74	735.33	1.0845
	1.0369	97.275	1.245		1.4002	240.27	1.0365		1.0369	-159.07	-0.43459
	1.1152	74.401	2.1461		1.8049	243.3	1.5361		1.1152	-165.99	0.40173
	1.4002	65.623	2.0528		2.3786	282.18	0.81213		1.4002	-194.56	1.0514
	1.8049	78.731	1.2405		3.1224	314.18	0.65275		1.8049	-161.18	0.40348
	2.3786	80.155	1.4488		4.3053	376.92	1.2721		2.3786	-98.987	0.34824
	3.1224	83.502	1.8971		5.7043	456.83	2.3379		3.1224	-125.8	0.1503
	4.3053	168.15	2.1738		7.3322	512.25	1.5615		4.3053	-41.85	0.92301
	5.7043	163.71	5.6192		8.747	688	2.3073		5.7043	-82.37	2.694
	7.3322	231.54	3.3443		9.74	658.08	2.3997		7.3322	-56.423	3.1182
	8.747	271.7	2.8771		1.0369	-234.06	0.97554		8.747	-62.529	2.7482
	9.74	287.49	4.6691		1.1152	-128.25	0.62945		9.74	-14.099	2.5241
	1.0369	119.21	4.7144		1.4002	-129.16	0.79952		1.0369	-57.542	0.86719
	1.1152	98.996	4.7739		1.8049	-168.13	1.11		1.1152	-56.29	-1.2211
	1.4002	111.07	3.4348		2.3786	-334.09	0.7598		1.4002	-49.772	0.30869
	1.8049	113.59	-1.5642		3.1224	-333.83	0.44723		1.8049	-74.589	-0.1724
	2.3786	182.09	5.8591		4.3053	73.69	1.2156		2.3786	-21.317	0.95289
	3.1224	245.32	5.9021		5.7043	-18.737	1.119		3.1224	-48.619	0.11268
	4.3053	176.44	5.0929		7.3322	-141.65	1.4889		4.3053	-12.918	4.5879
	5.7043	290.97	5.6884		8.747	-52.904	2.4644		5.7043	-59.167	6.3545
	7.3322	472.41	5.9365		9.74	-199.72	1.9844		7.3322	-13.667	7.8467
	8.747	856.64	10.276		1.0369	1.3764	0.38997		8.747	-41.64	7.5167
	9.74	608.63	10.523		1.1152	49.156	0.53852		9.74	-40.091	8.3552
	1.0369	3.135	-0.26431		1.4002	165.65	0.74998		1.0369	211.99	0.36201
	1.1152	-5.0216	0.13422		1.8049	232.41	0.67304		1.1152	232.65	0.17432
	1.4002	-11.112	0.18728		2.3786	129.4	0.62862		1.4002	279.56	0.31479
	1.8049	-11.359	0.4002		3.1224	256.48	0.27135		1.8049	341.85	0.23211
	2.3786	2.7384	0.33216		4.3053	156.62	1.7288		2.3786	354.37	0.54686
	3.1224	12.539	0.78734		5.7043	283.08	1.9994		3.1224	304.92	0.37107
	4.3053	38.902	6.3027		7.3322	287.1	1.8976		4.3053	427	0.46244
	5.7043	55.782	7.3217		8.747	254.89	1.3353		5.7043	457.82	1.3234
	7.3322	67.461	7.4952		9.74	147.45	1.9057		7.3322	586.92	1.4797
	8.747	76.65	7.0892		1.0369	27.274	0.37156		8.747	592.47	1.727
	9.74	96.594	6.178		1.1152	-24.024	0.78661		9.74	765.74	1.867
	1.0369	72.374	2.9334		1.4002	148.51	0.40443		1.0369	121.93	0.43801
	1.1152	86.734	3.4862		1.8049	149.77	0.38385		1.1152	93.982	0.11126
	1.4002	102.57	2.712		2.3786	88.801	0.6544		1.4002	121.13	0.30082
	1.8049	72.087	3.0051		3.1224	141.15	0.48387		1.8049	149.59	0.89796
	2.3786	96.427	2.1456		4.3053	248.16	1.5417		2.3786	119.29	0.31655
	3.1224	98.922	2.704		5.7043	310.55	2.0814		3.1224	111.02	1.1554
	4.3053	169.18	4.0274		7.3322	308.07	2.1758		4.3053	262.21	0.44218
	5.7043	220.45	7.7113		8.747	376.36	1.8958		5.7043	273.57	1.4105
	7.3322	334.18	8.6942		9.74	276.77	1.795		7.3322	354.41	2.3181
	8.747	397.87	8.0723		1.0369	-4.2677	7.4239		8.747	284.58	3.4036
	9.74	470.71	8.1788		1.1152	17.009	5.5681		9.74	349.53	2.9659
	1.0369	28.831	2.4836		1.4002	-91.357	7.8097		1.0369	-25.29	-0.10815
	1.1152	62.084	2.993		1.8049	-104.03	5.6707		1.1152	-9.7285	-0.32551
	1.4002	53.072	1.0949		2.3786	-98.377	5.4674		1.4002	-5.742	0.64506
	1.8049	71.94	-0.47791		3.1224	-16.389	3.1095		1.8049	2.9676	1.3112
	2.3786	69.401	3.5379		4.3053	-10.222	6.2216		2.3786	-17.499	0.84261
	3.1224	68.976	3.2428		5.7043	12.578	10.222		3.1224	32.5	0.57934
	4.3053	189.94	4.8006		7.3322	-67.044	14.17		4.3053	71.202	0.43336
	5.7043	186.69	6.1844		8.747	92.036	9.1209		5.7043	121.59	2.2051
	7.3322	242.94	8.0289		9.74	111.82	13.855		7.3322	105	2.9875
	8.747	320.74	8.0964		1.0369	620.16	0.93728		8.747	86.828	4.1028
	9.74	353.23	7.6109		1.1152	634.89	0.21781		9.74	122.96	4.752
	1.0369	74.524	1.3525		1.4002	625.11	0.26845		1.0369	214.82	0.18973
	1.1152	63.036	1.0939		1.8049	695.83	0.80123		1.1152	188.69	-0.63959
	1.4002	58.341	0.57382		2.3786	650.92	0.72614		1.4002	243.32	0.02131
	1.8049	44.026	0.80975		3.1224	820.76	0.8723		1.8049	235.83	-0.04046
	2.3786	61.5	0.88339		4.3053	819.19	0.38948		2.3786	253.47	2.8939
	3.1224	47.956	0.9248		5.7043	965.83	0.8117		3.1224	357.66	1.2842
	4.3053	141.87	4.2046		7.3322	988.69	0.83197		4.3053	379.44	1.7351
	5.7043	146.98	6.0344		8.747	1054	0.67962		5.7043	402.16	4.8339
	7.3322	167.06	5.351		9.74	1177.9	0.70795		7.3322	516.93	6.2609
	8.747	215.72	5.429		1.0369	420.65	2.3571		8.747	654.16	8.6264
	9.74	224.82	5.0522		1.1152	455.15	2.1149		9.74	579.12	9.8241
	1.0369	24.051	1.5346		1.4002	565.6	2.4176		1.0369	212.81	2.8524
	1.1152	9.4911	0.93028		1.8049	588.01	1.8612		1.1152	223.91	3.3321
	1.4002	-9.4152	0.76736		2.3786	616.04	1.4752		1.4002	162.55	3.5197
	1.8049	0.63943	1.3973		3.1224	537.43	1.2412		1.8049	177.19	3.0822
	2.3786	3.9636	1.6106		4.3053	824.49	2.7467		2.3786	181.14	5.3159
	3.1224	7.7193	1.2359		5.7043	980.09	2.5992		3.1224	228.28	6.8907
	4.3053	54.128	1.6888		7.3322	1058.9	2.0459		4.3053	399.13	4.3161
	5.7043	103.02	0.66376		8.747	1185.8	2.9347		5.7043	448.21	5.2779
	7.3322	100.74	3.9998		9.74	1102.8	2.3823		7.3322	548.42	5.8339
	8.747	187.82	2.3875		1.0369	178.51	1.8939		8.747	600.96	2.8837
	9.74	187.3	3.8375		1.1152	175.81	1.8093		9.74	479.03	7.1787
	1.0369	56.241	0.51758		1.4002	332.78	1.2834		1.0369	21.269	2.7182
	1.1152	56.505	0.28657		1.8049	438.57	1.2219		1.1152	-11.923	2.9169
	1.4002	42.281	-0.017923		2.3786	344.91	1.7243		1.4002	-4.9922	2.6248
	1.8049	47.16	-0.1861		3.1224	306.18	0.52877		1.8049	30.049	1.8061
	2.3786	45.471	-0.10077		4.3053	460.71	1.9585		2.3786	28.921	2.0408
	3.1224	52.836	0.086622		5.7043	369.07	2.7309		3.1224	34.515	4.6588
	4.3053	117.51	1.5356		7.3322	520.57	2.9393		4.3053	109.39	4.9829
	5.7043	131.73	3.1902		8.747	357.57	3.3976		5.7043	117.21	6.736
	7.3322	156.35	3.9091		9.74	319.69	3.6655		7.3322	185.91	8.3236
	8.747	176.58	3.9529		1.0369	71.523	0.43465		8.747	185.56	5.5276
	9.74	217.36	3.5137		1.1152	59.623	-0.26559		9.74	169.5	9.6147
	1.0369	7.6018	0.75472		1.4002	-19.588	-0.23234		1.0369	437.35	0.97205
	1.1152	-1.6408	0.04717		1.8049	72.694	0.67567		1.1152	459.93	0.10063
	1.4002	-4.1306	0.097244		2.3786	46.262	0.14827		1.4002	337.54	1.0369
	1.8049	-4.9548	0.089137		3.1224	-159.5	0.10847		1.8049	327.03	0.10899
	2.3786	9.6371	0.038415		4.3053	149.85	0.33205		2.3786	374.11	0.68215
	3.1224	23.035	0.50519		5.7043	123.93	0.97575		3.1224	400.03	0.55745
	4.3053	28.124	1.9492		7.3322	73.639	1.3114		4.3053	518.46	0.15876
	5.7043	34.801	4.0467		8.747	88.69	1.4787		5.7043	549.57	0.7401
	7.3322	35.997	4.0565		9.74	41.854	2.7906		7.3322	795.5	1.9434
	8.747	31.303	4.0662		1.0369	161.1	0.74753		8.747	839.65	2.1647
	9.74	50.043	4.8573		1.1152	172.13	0.94682		9.74	924.56	2.589
	1.0369	92.938	0.17941		1.4002	137.45	0.94596		1.0369	11.97	0.48493
	1.1152	89.169	0.28961		1.8049	134.96	1.3055		1.1152	45.344	0.17995
	1.4002	117.03	0.12225		2.3786	219.42	0.8959		1.4002	75.815	-0.35022
	1.8049	98.181	0.015398		3.1224	199.34	0.70334		1.8049	65.362	0.081953
	2.3786	84.382	0.022495		4.3053	245.99	0.98803		2.3786	59.937	0.33759
	3.1224	95.253	0.33095		5.7043	242.88	1.1198		3.1224	111.77	0.25913
	4.3053	230.73	1.0693		7.3322	291.67	1.9363		4.3053	53.103	1.294
	5.7043	300.9	0.99428		8.747	352.39	1.2542		5.7043	122.14	0.60719
	7.3322	369.48	1.0147		9.74	382.21	1.8937		7.3322	83.568	3.0873
	8.747	403.18	2.0957		1.0369	540.1	0.95019		8.747	127.98	1.9151
	9.74	380.52	1.9842		1.1152	453.79	1.1473		9.74	141.04	3.77
	1.0369	21.737	1.0912		1.4002	382.06	1.2083		1.0369	222.63	1.2128
	1.1152	18.238	1.1853		1.8049	396.26	1.0461		1.1152	258.53	0.50049
	1.4002	23.538	1.3224		2.3786	410.96	1.2888		1.4002	256.97	0.80245
	1.8049	39.691	1.3371		3.1224	540.93	0.92386		1.8049	275.13	0.88439
	2.3786	43.935	1.678		4.3053	668.97	0.99596		2.3786	363.06	0.80256
	3.1224	59.888	2.0184		5.7043	747.28	1.3609		3.1224	376.55	0.76098
	4.3053	108.85	3.2843		7.3322	845.28	1.2002		4.3053	360.86	1.3718
	5.7043	157.42	3.4219		8.747	878.57	1.1815		5.7043	515.82	2.6173
	7.3322	199.83	3.5633		9.74	917.16	1.3239		7.3322	623.96	2.8216
	8.747	289.39	2.973		1.0369	584.73	1.2728		8.747	770.07	3.4304
	9.74	303.22	3.877		1.1152	444.94	-0.27221		9.74	1025.5	3.4242
	1.0369	92.413	5.0335		1.4002	519.38	0.30951		1.0369	831.31	0.042529
	1.1152	80.25	4.2154		1.8049	497.37	0.51577		1.1152	783.26	-0.39071
	1.4002	78.411	4.0664		2.3786	539.44	0.5654		1.4002	790.92	0.3749
	1.8049	140.69	3.7615		3.1224	630.32	0.57657		1.8049	1101.8	0.26346
	2.3786	133.17	4.3408		4.3053	720.6	0.67729		2.3786	1144.1	0.58552
	3.1224	154.66	4.9944		5.7043	865.39	1.2104		3.1224	1446.6	0.36084
	4.3053	204.16	3.6876		7.3322	764.9	1.5114		4.3053	935.67	0.10201
	5.7043	302.49	4.3399		8.747	799.77	1.4711		5.7043	1034.9	0.56174
	7.3322	408.8	7.3457		9.74	914.11	1.8393		7.3322	1405.3	0.99003
	8.747	557.4	5.9625		1.0369	161.99	0.60558		8.747	1363.2	0.7684
	9.74	548.33	7.1467		1.1152	-49.18	0.84085		9.74	1955.8	1.7219
	1.0369	12.114	1.831		1.4002	22.8	1.7042		1.0369	76.894	0.77386
	1.1152	21.303	1.8456		1.8049	91.707	0.4868		1.1152	64.685	0.45913
	1.4002	-18.071	1.763		2.3786	126.99	0.82961		1.4002	50.407	1.1027
	1.8049	-7.7988	0.68425		3.1224	137.66	0.10199		1.8049	32.821	0.73013
	2.3786	-0.10206	1.8377		4.3053	119.31	0.76159		2.3786	8.7498	1.3466
	3.1224	32.753	2.713		5.7043	318.38	1.4618		3.1224	29.14	2.0787
	4.3053	85.634	3.6341		7.3322	330.59	2.6788		4.3053	76.372	4.3511
	5.7043	108.01	7.1141		8.747	205.09	2.1733		5.7043	82.284	5.4179
	7.3322	142.69	7.6122		9.74	296.57	2.5277		7.3322	50.461	4.4185
	8.747	150.16	8.4741		1.0369	129.51	1.5433		8.747	86.07	3.8861
	9.74	147.18	6.8097		1.1152	9.9697	1.3359		9.74	63.787	3.6533
	1.0369	-39.375	0.34124		1.4002	-102.33	1.1804		1.0369	45.43	0.27537
	1.1152	-8.1342	0.39126		1.8049	5.9614	1.4656		1.1152	-5.5701	0.054018
	1.4002	-28.574	-0.094762		2.3786	68.575	1.447		1.4002	-34.3	0.23246
	1.8049	-39.79	0.056719		3.1224	37.338	2.0931		1.8049	-13.421	0.19708
	2.3786	-17.395	0.85602		4.3053	74.587	2.6499		2.3786	-35.506	0.028671
	3.1224	-7.4513	1.9251		5.7043	145.72	4.105		3.1224	15.614	3.5723
	4.3053	12.34	2.7137		7.3322	127.4	3.7816		4.3053	44.36	2.9058
	5.7043	26.441	4.1125		8.747	196.22	4.5667		5.7043	42.529	6.3644
	7.3322	16.85	4.029		9.74	139.59	4.6644		7.3322	49.01	5.4896
	8.747	21.224	3.4525		1.0369	308.86	0.71216		8.747	42.362	5.7406
	9.74	22.2	2.8165		1.1152	265.15	0.51391		9.74	47.49	3.0083
	1.0369	9.7587	0.59014		1.4002	249.78	0.71653		1.0369	85.672	-0.026376
	1.1152	23.929	0.41806		1.8049	297.5	0.64218		1.1152	52.58	-0.14016
	1.4002	20.87	0.25263		2.3786	303.47	0.64747		1.4002	49.44	0.0072255
	1.8049	16.802	0.41625		3.1224	418.59	0.50069		1.8049	66.078	0.53102
	2.3786	11.579	1.2866		4.3053	470.09	1.2595		2.3786	106.03	0.21441
	3.1224	3.6145	2.0673		5.7043	495.21	1.7281		3.1224	84.635	0.48672
	4.3053	60.888	2.9893		7.3322	494.24	0.8753		4.3053	146.1	0.67931
	5.7043	74.362	5.0802		8.747	546.12	2.0433		5.7043	167	1.0949
	7.3322	77.978	6.0724		9.74	529.2	0.59273		7.3322	186.66	2.0067
	8.747	79.638	6.9502		1.0369	790.06	1.5812		8.747	230.43	2.7655
	9.74	100.46	7.0664		1.1152	671.48	1.4867		9.74	222.89	3.3108
	1.0369	36.895	-0.16016		1.4002	751.75	2.0811		1.0369	72.307	0.73787
	1.1152	16.743	0.053272		1.8049	642.59	2.0913		1.1152	39.169	0.13664
	1.4002	61.982	-0.20348		2.3786	682.14	1.7185		1.4002	63.919	1.2207
	1.8049	70.734	0.48759		3.1224	619.56	1.1779		1.8049	78.94	0.78489
	2.3786	58.023	0.64424		4.3053	1027.2	2.1915		2.3786	82.877	0.53728
	3.1224	92.615	1.2234		5.7043	1116.1	1.6361		3.1224	86.748	0.83552
	4.3053	119.25	1.9635		7.3322	1208.9	2.4226		4.3053	92.872	3.3696
	5.7043	116.71	3.2405		8.747	1337.1	2.2579		5.7043	105.77	4.456
	7.3322	192.27	3.6019		9.74	1334	1.6539		7.3322	118.01	3.6446
	8.747	190.65	3.1889		1.0369	269.08	0.27824		8.747	119.53	6.1388
	9.74	276.01	4.7001		1.1152	98.032	0.45434		9.74	116.8	4.981
	1.0369	15.391	0.98461		1.4002	59.047	0.31786		1.0369	-46.278	0.27405
	1.1152	-12.254	0.73861		1.8049	102.1	0.58554		1.1152	90.244	0.53783
	1.4002	-30.896	0.33653		2.3786	68.632	0.47216		1.4002	208.18	0.85334
	1.8049	-16.038	0.51584		3.1224	62.667	0.62519		1.8049	252.9	0.91914
	2.3786	-6.6449	0.67997		4.3053	193.29	1.9309		2.3786	313.49	0.46394
	3.1224	-22.95	1.0198		5.7043	192.64	2.4729		3.1224	314.99	0.51512
	4.3053	2.9053	3.6077		7.3322	160.13	3.8212		4.3053	406.4	1.3765
	5.7043	4.4633	5.5044		8.747	203.5	3.0035		5.7043	543.95	0.84158
	7.3322	22.028	6.5737		9.74	204.65	2.6428		7.3322	808.98	1.5643
	8.747	22.631	6.6543		1.0369	0.99604	0.31141		8.747	1082	1.3197
	9.74	23.108	5.2354		1.1152	77.292	-0.051032		9.74	1114.1	1.4548
	1.0369	-6.8061	0.093091		1.4002	-6.386	0.017451		1.0369	-0.51153	0.9905
	1.1152	9.2058	0.04272		1.8049	59.313	0.22356		1.1152	0.47215	1.6696
	1.4002	3.5715	0.037518		2.3786	29.193	0.16817		1.4002	21.599	1.126
	1.8049	2.8956	-0.17675		3.1224	4.2536	0.14194		1.8049	3.7828	0.78899
	2.3786	5.3411	0.36007		4.3053	21.825	1.2552		2.3786	0.80667	3.0724
	3.1224	9.5679	0.37342		5.7043	-19.559	1.1381		3.1224	6.503	1.7336
	4.3053	17.24	1.57		7.3322	44.432	2.0014		4.3053	16.711	4.7148
	5.7043	54.68	2.3165		8.747	77.81	0.85038		5.7043	45.726	7.3818
	7.3322	61.358	2.5865		9.74	65.949	0.66925		7.3322	40.383	8.035
	8.747	66.28	5.6154		1.0369	106.58	0.84183		8.747	32.669	9.3072
	9.74	67.364	4.4749		1.1152	34.759	0.48478		9.74	40.53	8.988
	1.0369	80.963	1.2098		1.4002	69.252	0.60051		1.0369	-8.5304	0.28752
	1.1152	67.836	0.33795		1.8049	37.76	0.81961		1.1152	3.1121	0.11518
	1.4002	70.094	0.27731		2.3786	84.98	0.63033		1.4002	-6.6136	0.17061
	1.8049	67.186	0.20134		3.1224	32.545	0.56037		1.8049	-64.148	0.13268
	2.3786	61.249	0.099409		4.3053	170.6	1.1101		2.3786	-3.1361	0.61273
	3.1224	96.254	0.23621		5.7043	177.98	1.7746		3.1224	-66.808	-0.026653
	4.3053	138.58	0.63467		7.3322	158.55	2.5562		4.3053	36.344	4.516
	5.7043	169.45	2.9645		8.747	169.47	2.3996		5.7043	12.366	5.7066
	7.3322	251.3	4.73		9.74	164.35	1.5658		7.3322	-13.593	3.6316
	8.747	347.66	4.9349		1.0369	381.26	2.3373		8.747	42.062	4.3679
	9.74	299.86	5.5493		1.1152	451.67	2.0932		9.74	42.646	5.5938
	1.0369	-49.963	0.65221		1.4002	391.98	1.3548		1.0369	69.768	1.1038
	1.1152	-39.149	0.53169		1.8049	372.97	1.8672		1.1152	70.047	1.1502
	1.4002	-25.812	0.44732		2.3786	485.81	1.6202		1.4002	65.434	1.1651
	1.8049	-2.778	0.95335		3.1224	513.73	1.4988		1.8049	66.585	1.4032
	2.3786	-42.365	0.47353		4.3053	587.86	1.3337		2.3786	88.958	2.5583
	3.1224	-35.725	0.45177		5.7043	780.45	0.79608		3.1224	97.232	2.7527
	4.3053	-14.548	5.3692		7.3322	1009.8	1.7125		4.3053	120.28	3.391
	5.7043	-7.1462	5.5037		8.747	1140.5	2.4864		5.7043	163.75	3.8404
	7.3322	1.0805	6.6632		9.74	1078.2	4.1427		7.3322	199.01	5.1688
	8.747	2.2643	8.5161		1.0369	180.01	0.93476		8.747	280.53	5.6813
	9.74	-24.742	4.7703		1.1152	150.11	0.59084		9.74	331.53	6.0958
	1.0369	112.18	-0.38434		1.4002	74.973	0.46289		1.0369	40.748	0.38028
	1.1152	122.7	0.15013		1.8049	64.436	0.47741		1.1152	19.354	0.041038
	1.4002	139.78	0.34795		2.3786	69.738	0.85274		1.4002	46.636	0.22379
	1.8049	118.91	0.028206		3.1224	146.78	0.79825		1.8049	11.252	0.36856
	2.3786	115.45	-0.35951		4.3053	234.99	1.8576		2.3786	55.781	0.061504
	3.1224	160.97	0.30622		5.7043	295.17	2.4671		3.1224	65.935	0.44087
	4.3053	245.05	0.7194		7.3322	336.93	3.3338		4.3053	114.84	0.27333
	5.7043	303.65	1.5711		8.747	344.05	2.7761		5.7043	135.3	0.57214
	7.3322	444.01	4.0159		9.74	271.15	2.8483		7.3322	129.06	0.25366
	8.747	593.69	5.5861		1.0369	-6.1914	0.1493		8.747	172.19	0.85885
	9.74	685.26	6.288		1.1152	-91.2	0.51212		9.74	181.3	0.65509
	1.0369	16.637	1.8363		1.4002	-141.6	0.47935		1.0369	132.4	0.98479
	1.1152	13.832	1.1545		1.8049	-21.801	0.35513		1.1152	170.76	0.49431
	1.4002	-5.0921	0.5162		2.3786	-35.068	0.29216		1.4002	167.05	-0.073496
	1.8049	11.867	0.82402		3.1224	76.835	0.21375		1.8049	178.5	0.46987
	2.3786	20.4	0.77445		4.3053	-48.019	0.38813		2.3786	210.15	1.175
	3.1224	19.841	1.336		5.7043	93.546	0.66692		3.1224	246.34	0.71731
	4.3053	34.635	3.4148		7.3322	104.08	0.42959		4.3053	264.52	1.2247
	5.7043	76.904	7.8214		8.747	175.29	0.41953		5.7043	329.82	1.3564
	7.3322	89.248	8.3636		9.74	236.14	0.46405		7.3322	434.58	1.7747
	8.747	91.886	8.5077		1.0369	33.836	0.28153		8.747	531.71	2.7647
	9.74	130.76	8.6301		1.1152	-122.45	0.138		9.74	551.18	3.249
	1.0369	125.14	1.3154		1.4002	-169.15	0.091537		1.0369	207.29	2.2363
	1.1152	92.332	0.86705		1.8049	-85.728	0.11789		1.1152	199.27	1.7658
	1.4002	89.551	0.58102		2.3786	-107.29	0.15743		1.4002	167.15	2.1355
	1.8049	89.899	0.79301		3.1224	-143.36	0.08118		1.8049	213.5	1.8691
	2.3786	76.715	1.0547		4.3053	-195.03	0.22381		2.3786	264.78	1.9129
	3.1224	113.31	0.99262		5.7043	-84.258	0.50957		3.1224	307.45	0.9945
	4.3053	181.33	1.1622		7.3322	-138.18	0.53414		4.3053	364.93	1.8654
	5.7043	227.64	1.6634		8.747	-75.406	0.50252		5.7043	441.32	2.4549
	7.3322	295.79	2.5454		9.74	-38.164	0.37813		7.3322	476.66	2.779
	8.747	351.12	2.6367		1.0369	197.83	0.47654		8.747	620.23	1.4911
	9.74	370.87	3.5247		1.1152	218.62	0.50618		9.74	790.99	3.7602
	1.0369	43.311	1.833		1.4002	237.25	0.51879		1.0369	182.61	0.53577
	1.1152	57.576	1.338		1.8049	261.45	0.53546		1.1152	140.66	0.2724
	1.4002	53.499	1.271		2.3786	259.89	0.38316		1.4002	217.3	0.73923
	1.8049	63.496	0.94599		3.1224	311.35	0.57532		1.8049	239.78	0.53477
	2.3786	61.174	1.4814		4.3053	356.88	0.76343		2.3786	226.99	-0.41195
	3.1224	71.954	1.5384		5.7043	380.53	0.85615		3.1224	218.45	1.1037
	4.3053	109.3	1.2908		7.3322	484.05	0.58269		4.3053	257.36	2.072
	5.7043	144.06	3.0617		8.747	526.81	0.94771		5.7043	352.1	1.8497
	7.3322	166.49	4.0156		9.74	566.86	0.96297		7.3322	417.54	4.3485
	8.747	204.7	6.14		1.0369	66.739	0.3716		8.747	385.26	3.777
	9.74	248.01	4.9711		1.1152	98.232	0.46459		9.74	414.06	6.2181
	1.0369	35.063	1.2958		1.4002	78.215	0.52204		1.0369	12.519	1.0389
	1.1152	42.586	1.1159		1.8049	103.39	0.65739		1.1152	-25.664	0.36578
	1.4002	35.354	2.2053		2.3786	101.21	0.4387		1.4002	0.1438	0.76011
	1.8049	44.707	2.3579		3.1224	80.89	0.15126		1.8049	-17.182	1.0508
	2.3786	41.616	1.4818		4.3053	115.03	0.65231		2.3786	-46.792	1.3151
	3.1224	66.064	1.5394		5.7043	176.27	1.0242		3.1224	-11.624	1.3164
	4.3053	108.33	1.6582		7.3322	185.26	1.1145		4.3053	22.647	6.8257
	5.7043	134.66	2.3383		8.747	138.98	1.5594		5.7043	10.726	6.2079
	7.3322	178.12	3.3088		9.74	85.184	1.0516		7.3322	10.344	8.4201
	8.747	227.06	4.5877		1.0369	117.35	0.31305		8.747	10.913	4.3603
	9.74	234.04	4.0744		1.1152	103.97	-0.17795		9.74	31.837	5.1346
	1.0369	-31.379	0.77596		1.4002	156.82	0.98762		1.0369	279.15	1.6541
	1.1152	-13.619	1.1572		1.8049	11.001	0.7343		1.1152	237.43	0.28023
	1.4002	-25.315	0.15015		2.3786	128.15	-0.0016404		1.4002	237.89	0.58849
	1.8049	-11.336	0.90751		3.1224	239.1	1.0165		1.8049	231.08	1.3587
	2.3786	-21.504	0.96652		4.3053	-63.902	1.0825		2.3786	339.58	1.0925
	3.1224	-1.0091	1.0146		5.7043	81.889	1.2326		3.1224	394.53	-1.0185
	4.3053	14.94	1.0758		7.3322	217.68	-0.15105		4.3053	486.6	0.31875
	5.7043	16.268	1.9144		8.747	288.02	1.4313		5.7043	515.02	1.4991
	7.3322	31.537	1.3474		9.74	403.17	2.4127		7.3322	651.08	0.99252
	8.747	42.812	3.3669		1.0369	88.161	0.62776		8.747	722.71	1.776
	9.74	51.552	2.9485		1.1152	87.861	0.46313		9.74	1099.7	3.972
	1.0369	76.635	0.91541		1.4002	89.683	-0.18157		1.0369	78.3	0.83071
	1.1152	82.139	0.64003		1.8049	112.35	-0.024038		1.1152	53.461	0.39172
	1.4002	81.897	1.1931		2.3786	123.94	0.36844		1.4002	44.116	0.14971
	1.8049	85.761	1.0066		3.1224	126.28	0.35212		1.8049	51.367	0.89263
	2.3786	94.59	1.1939		4.3053	129.21	0.40984		2.3786	49.252	0.75339
	3.1224	126.02	1.2678		5.7043	173.27	0.37498		3.1224	78.181	0.6987
	4.3053	121.88	2.125		7.3322	218.83	0.71786		4.3053	116.2	1.7857
	5.7043	167.77	2.8384		8.747	251.48	0.47427		5.7043	150.62	1.8835
	7.3322	194.37	4.1666		9.74	274.78	0.45738		7.3322	157.07	2.4155
	8.747	221.72	3.8723		1.0369	31.405	3.4935		8.747	209.52	3.4825
	9.74	240.59	4.3049		1.1152	25.665	2.1606		9.74	176.66	3.3638
	1.0369	-40.562	0.71115		1.4002	39.991	5.1443		1.0369	241.32	0.40239
	1.1152	-51.131	0.92669		1.8049	43.448	2.754		1.1152	224.9	0.60769
	1.4002	-19.854	0.56052		2.3786	56.571	2.26		1.4002	236.63	1.0839
	1.8049	-56.894	1.6571		3.1224	54.774	3.2569		1.8049	226.38	0.87125
	2.3786	-44.636	0.96964		4.3053	82.685	2.2721		2.3786	237.04	0.87031
	3.1224	-8.0891	0.47757		5.7043	89.666	4.0436		3.1224	277.85	1.2388
	4.3053	-53.768	0.70803		7.3322	91.8	2.7016		4.3053	357.87	1.558
	5.7043	-30.259	2.805		8.747	115.39	5.2891		5.7043	423.97	1.8042
	7.3322	-14.832	2.0125		9.74	97.574	2.7252		7.3322	502.71	2.4266
	8.747	-10.328	2.9345		1.0369	102.08	2.9044		8.747	534.22	3.9038
	9.74	-27.648	1.829		1.1152	121.89	3.0266		9.74	580.47	4.6178
	1.0369	-1.8465	1.7734		1.4002	147.41	1.9203		1.0369	210.32	-0.1482
	1.1152	20.224	4.4206		1.8049	181.57	2.4027		1.1152	282.78	-0.12944
	1.4002	36.912	3.0706		2.3786	145.43	2.8801		1.4002	250.09	-0.21635
	1.8049	69.572	3.0049		3.1224	184.82	1.701		1.8049	303.36	-0.18042
	2.3786	59.296	1.9599		4.3053	212.6	3.1612		2.3786	374.23	-0.21825
	3.1224	82.915	3.4887		5.7043	261.11	2.9772		3.1224	247.13	-0.30123
	4.3053	63.092	-1.1093		7.3322	312.21	3.0808		4.3053	378.73	-0.070314
	5.7043	108.01	2.8924		8.747	338.41	2.3155		5.7043	419.65	0.10122
	7.3322	123.95	5.5752		9.74	402	3.2669		7.3322	588.98	0.22624
	8.747	179.06	6.6447		1.0369	23.178	0.467		8.747	808.87	0.86171
	9.74	201.38	7.1899		1.1152	16	0.37245		9.74	1049.8	1.3211
	1.0369	-15.931	0.40816		1.4002	18.964	0.37802		1.0369	91.312	0.48934
	1.1152	-48.021	0.16471		1.8049	45.795	0.53219		1.1152	93.521	0.0035217
	1.4002	-35.54	0.076348		2.3786	22.816	0.63799		1.4002	77.164	0.34114
	1.8049	-30.158	0.2218		3.1224	30.169	1.2291		1.8049	100.89	0.42277
	2.3786	-21.257	0.25175		4.3053	74.231	0.9225		2.3786	110.93	0.6209
	3.1224	18.881	0.067767		5.7043	81.415	1.1356		3.1224	79.101	0.9527
	4.3053	-0.70091	1.4501		7.3322	100.29	1.9918		4.3053	177.09	3.22
	5.7043	13.342	1.7573		8.747	91.205	1.5077		5.7043	170.87	2.9509
	7.3322	25.351	3.2747		9.74	92.118	1.415		7.3322	190.74	4.4854
	8.747	67.043	3.5144		1.0369	53.552	1.7696		8.747	166.18	5.575
	9.74	69.988	4.0015		1.1152	71.333	1.1615		9.74	201.98	6.6059
	1.0369	-8.8341	1.0765		1.4002	79.102	-0.060163		1.0369	117.3	1.9151
	1.1152	4.1205	0.96734		1.8049	72.198	1.1752		1.1152	178.89	2.6198
	1.4002	0.7401	0.2125		2.3786	76.802	1.6315		1.4002	171.34	1.858
	1.8049	11.873	1.3005		3.1224	75.937	1.015		1.8049	178.83	2.0405
	2.3786	5.1492	0.70217		4.3053	92.674	0.29906		2.3786	181.1	1.7196
	3.1224	0.28204	1.0308		5.7043	136.03	3.6074		3.1224	222.63	1.0989
	4.3053	26.479	1.9405		7.3322	132.91	3.6603		4.3053	353.17	1.587
	5.7043	50.605	1.8482		8.747	125.34	4.7389		5.7043	376.16	1.923
	7.3322	41.637	2.7721		9.74	158.89	4.1863		7.3322	450.93	1.6783
	8.747	55.932	3.1029		1.0369	0.708	0.34158		8.747	830.88	3.3919
	9.74	75.054	2.927		1.1152	9.9046	0.32046		9.74	884.54	4.0723
	1.0369	44.506	0.44086		1.4002	7.3729	0.21033		1.0369	126.48	1.611
	1.1152	48.504	0.59317		1.8049	25.077	0.31631		1.1152	133.17	0.90951
	1.4002	52.672	0.51174		2.3786	-3.749	0.066066		1.4002	157.37	1.4935
	1.8049	35.594	0.42555		3.1224	-4.5748	0.30256		1.8049	199.73	1.6026
	2.3786	56.505	0.35563		4.3053	10.514	0.26568		2.3786	188.2	1.9371
	3.1224	83.86	0.55855		5.7043	28.103	2.3372		3.1224	199.81	1.4958
	4.3053	136.9	0.3136		7.3322	30.762	2.247		4.3053	202.47	2.0889
	5.7043	149.94	0.40343		8.747	33.611	1.8934		5.7043	274.06	2.6927
	7.3322	191.86	0.8188		9.74	42.661	2.9504		7.3322	337.19	3.6939
	8.747	210.26	1.1894		1.0369	-13.472	0.066094		8.747	381.39	4.6408
	9.74	253.82	1.3244		1.1152	-21.018	0.19798		9.74	452.26	6.4046
	1.0369	9.6327	0.71354		1.4002	-25.998	-0.0079245		1.0369	126.26	-1.4945
	1.1152	17.244	0.54152		1.8049	-11.481	0.37693		1.1152	129.89	0.24503
	1.4002	32.599	0.55189		2.3786	-2.6477	0.11799		1.4002	135.99	0.12075
	1.8049	29.31	1.0236		3.1224	-40.445	0.13794		1.8049	137.97	0.75847
	2.3786	47.67	0.58955		4.3053	-2.8163	0.36856		2.3786	168.92	0.41955
	3.1224	47.476	0.26451		5.7043	-5.7593	0.89583		3.1224	172.55	0.56767
	4.3053	16.482	1.0566		7.3322	4.8492	0.97706		4.3053	180.25	0.3466
	5.7043	69.046	2.2804		8.747	-7.3934	1.5673		5.7043	216.02	0.98154
	7.3322	88.105	3.5504		9.74	0.51028	1.1927		7.3322	290.47	1.8001
	8.747	100.16	3.3587		1.0369	113.99	0.34543		8.747	337.55	1.6051
	9.74	85.775	3.9889		1.1152	122.29	1.0165		9.74	433.46	1.8948
	1.0369	49.49	0.34827		1.4002	106.71	0.81319		1.0369	24.593	0.13711
	1.1152	44.462	0.65303		1.8049	112.88	0.806		1.1152	0.49575	0.55962
	1.4002	58.508	0.22527		2.3786	112.42	0.19331		1.4002	-9.0756	0.40596
	1.8049	43.138	0.53359		3.1224	85.974	2.0126		1.8049	-28.038	0.41227
	2.3786	51.804	0.21549		4.3053	175.55	-0.077102		2.3786	-37.882	0.80395
	3.1224	68.116	0.5164		5.7043	179.28	1.6894		3.1224	3.8606	1.2544
	4.3053	82.547	0.3795		7.3322	186.98	2.4522		4.3053	58.033	1.688
	5.7043	125.43	0.80139		8.747	208.9	1.604		5.7043	44.203	2.8282
	7.3322	135.61	1.3247		9.74	188.31	5.3116		7.3322	21.952	4.0096
	8.747	182.56	1.7356		1.0369	51.932	0.75093		8.747	28.734	6.6037
	9.74	165.93	1.8059		1.1152	67.46	0.34175		9.74	21.842	6.7891
	1.0369	16.27	0.77961		1.4002	77.031	0.24599		1.0369	92.29	0.085393
	1.1152	7.4458	0.27333		1.8049	79.642	0.46204		1.1152	89.893	0.39912
	1.4002	0.93096	0.062018		2.3786	70.225	0.33764		1.4002	93.921	0.41377
	1.8049	1.0675	0.80057		3.1224	61.261	0.57672		1.8049	74.581	0.47229
	2.3786	-5.1816	0.30279		4.3053	125.8	0.73391		2.3786	86.381	0.79098
	3.1224	3.0079	0.3763		5.7043	165.33	0.033311		3.1224	118.48	0.81511
	4.3053	16.241	0.60703		7.3322	170.98	0.76612		4.3053	173.05	1.5253
	5.7043	21.53	1.8251		8.747	193.77	0.99417		5.7043	191.72	2.0698
	7.3322	30.661	1.9996		9.74	144.19	0.87583		7.3322	230.43	2.8289
	8.747	27.06	2.5047		1.0369	116.12	0.62758		8.747	301.5	4.232
	9.74	17.627	2.7055		1.1152	115.03	0.56624		9.74	337.71	4.7772
	1.0369	-44.23	0.48409		1.4002	111.51	0.77098		1.0369	45.182	-0.18344
	1.1152	-33.326	0.39471		1.8049	121.95	0.40591		1.1152	30.106	0.039257
	1.4002	-26.842	0.51078		2.3786	129.74	0.4708		1.4002	58.149	0.058125
	1.8049	-41.464	0.526		3.1224	97.761	0.50314		1.8049	28.786	0.32915
	2.3786	-23.462	0.49971		4.3053	171.56	0.81099		2.3786	61.442	0.22909
	3.1224	-14.171	0.22006		5.7043	207.67	0.95812		3.1224	76.314	0.52407
	4.3053	-40.918	0.9248		7.3322	209.37	1.0553		4.3053	88.236	0.30152
	5.7043	-17.196	1.5593		8.747	232.52	1.1247		5.7043	86.463	1.0179
	7.3322	5.0438	1.6962		9.74	189.34	1.4404		7.3322	141.45	2.3909
	8.747	19.911	1.7916		1.0369	87.159	0.68104		8.747	153.93	2.968
	9.74	13.597	1.678		1.1152	87.555	0.4328		9.74	115.53	1.7361
	1.0369	25.976	0.68102		1.4002	77.903	0.92972		1.0369	133.57	0.032414
	1.1152	34.438	0.74349		1.8049	87.634	0.32404		1.1152	128.62	0.11477
	1.4002	36.182	0.44762		2.3786	111.89	-0.57016		1.4002	94.578	0.17858
	1.8049	46.17	0.77879		3.1224	123.23	1.5583		1.8049	107.19	0.42339
	2.3786	57.306	0.60178		4.3053	97.278	1.0286		2.3786	129.02	0.61082
	3.1224	67.566	0.76919		5.7043	125.89	2.1256		3.1224	172.96	0.29144
	4.3053	97.662	0.93054		7.3322	140.6	2.8523		4.3053	129.04	0.66009
	5.7043	116.48	1.2511		8.747	132.28	2.9508		5.7043	210.3	0.44177
	7.3322	111.15	2.1411		9.74	144.09	3.9314		7.3322	232.81	1.0268
	8.747	174.19	2.3129		1.0369	18.662	0.084459		8.747	283.72	1.4805
	9.74	167.53	2.9606		1.1152	1.6858	0.068059		9.74	391.01	1.4291
	1.0369	13.485	0.23859		1.4002	13.428	-1.1434		1.0369	0.35557	0.58315
	1.1152	12.789	0.25023		1.8049	-15.757	0.29589		1.1152	28.155	0.051996
	1.4002	-23.609	0.23133		2.3786	-53.197	0.11563		1.4002	30.432	0.94909
	1.8049	-15.318	0.35862		3.1224	-17.33	0.25605		1.8049	39.824	0.66864
	2.3786	5.7036	0.28706		4.3053	4.3074	0.25622		2.3786	58.196	1.4058
	3.1224	6.0235	0.19798		5.7043	10.197	0.8319		3.1224	94.221	0.89691
	4.3053	-20.539	0.18514		7.3322	-4.7891	1.1436		4.3053	68.993	1.5188
	5.7043	-4.321	0.97684		8.747	7.2653	0.83131		5.7043	101.48	0.8694
	7.3322	5.19	1.4926		9.74	9.9146	0.49453		7.3322	158.53	1.43
	8.747	33.51	1.8401		1.0369	8.2278	0.31996		8.747	170.57	2.4688
	9.74	20.527	1.7768		1.1152	21.012	0.023843		9.74	303.35	2.5908
	1.0369	184.77	0.78955		1.4002	2.7075	0.17742		1.0369	49.238	3.0206
	1.1152	191.64	0.8555		1.8049	48.287	0.29093		1.1152	62.42	4.0617
	1.4002	178.14	0.85976		2.3786	23.339	0.25157		1.4002	53.92	3.8643
	1.8049	185.43	1.24		3.1224	38.479	0.17137		1.8049	72.723	3.5862
	2.3786	184.86	1.0578		4.3053	16.215	0.20664		2.3786	82.584	4.9414
	3.1224	210.81	1.3416		5.7043	28.878	0.40247		3.1224	91.387	5.0067
	4.3053	229.08	0.73998		7.3322	39.526	0.63569		4.3053	75.548	4.2516
	5.7043	277.16	0.94358		8.747	38.09	0.64227		5.7043	140.72	5.3031
	7.3322	388.48	1.1876		9.74	38.523	0.50501		7.3322	184.85	5.2968
	8.747	427.02	1.8208		1.0369	-38.294	0.23557		8.747	182.7	5.3103
	9.74	455.94	2.4296		1.1152	-29.675	0.26758		9.74	262.43	4.2123
	1.0369	-12.521	0.36356		1.4002	-48.706	0.54722		1.0369	79.827	-0.067229
	1.1152	-13.846	0.42269		1.8049	-32.182	0.2714		1.1152	20.828	0.58149
	1.4002	-17.427	0.45231		2.3786	-36.649	0.63925		1.4002	42.974	0.60312
	1.8049	-18.806	0.59147		3.1224	-44.499	0.23382		1.8049	60.827	1.3628
	2.3786	-0.37961	0.48664		4.3053	-28.98	0.38208		2.3786	84.977	1.0842
	3.1224	-16.433	0.51448		5.7043	-22.425	0.33272		3.1224	96.865	1.415
	4.3053	24.505	0.4785		7.3322	-25.005	0.57592		4.3053	89.893	3.1554
	5.7043	35.979	0.68034		8.747	-10.371	0.20163		5.7043	81.612	5.5287
	7.3322	62.895	0.92611		9.74	-25.806	0.24698		7.3322	142.83	8.0003
	8.747	60.269	1.2165		1.0369	34.835	0.63587		8.747	205.03	9.2041
	9.74	118.3	1.5244		1.1152	33.265	0.72706		9.74	230.93	7.4051
	1.0369	38.39	2.047		1.4002	53.94	0.15921		1.0369	89.837	0.17916
	1.1152	39.671	1.2971		1.8049	78.897	0.74591		1.1152	70.456	0.54364
	1.4002	61.22	1.6047		2.3786	59.301	0.70875		1.4002	69.865	0.34638
	1.8049	63.413	1.9088		3.1224	61.331	1.6349		1.8049	62.508	-0.11531
	2.3786	88.354	1.7987		4.3053	36.808	0.95744		2.3786	48.877	0.69361
	3.1224	98.007	1.7798		5.7043	51.08	0.80369		3.1224	76.362	1.1024
	4.3053	110.63	1.7972		7.3322	51.4	1.5687		4.3053	120.9	2.1214
	5.7043	137.22	2.5435		8.747	61.683	1.7749		5.7043	133.79	3.0704
	7.3322	189.08	2.9943		9.74	79.19	2.2019		7.3322	156.83	3.4954
	8.747	261.6	3.6093		1.0369	25.701	0.092055		8.747	147.21	5.0192
	9.74	290.94	4.0301		1.1152	-4.7638	0.1848		9.74	157.57	3.2882
	1.0369	27.689	0.21972		1.4002	-4.397	0.4719		1.0369	20.455	0.15489
	1.1152	16.932	-0.033457		1.8049	4.8283	0.12629		1.1152	24.779	1.1624
	1.4002	30.896	-0.026424		2.3786	12.698	0.24539		1.4002	28.275	-0.18663
	1.8049	24.954	0.25929		3.1224	23.834	0.43516		1.8049	39.819	0.62476
	2.3786	16.937	0.32758		4.3053	14.196	0.38679		2.3786	28.825	0.87385
	3.1224	20.457	0.25193		5.7043	41.501	0.70892		3.1224	53.02	1.0035
	4.3053	36.529	0.36172		7.3322	48.89	0.77448		4.3053	87.669	2.1655
	5.7043	35.537	0.97397		8.747	59.451	0.9886		5.7043	111.14	2.8899
	7.3322	22.452	1.4434		9.74	65.033	1.4004		7.3322	140.91	4.4741
	8.747	58.07	1.9575		1.0369	31.303	0.00041095		8.747	170.35	6.784
	9.74	51.804	2.0279		1.1152	21.399	0.093836		9.74	194.46	7.0826
	1.0369	68.991	1.8063		1.4002	23.47	0.0090713		1.0369	17.986	-0.052499
	1.1152	92.66	1.8189		1.8049	35.391	0.13396		1.1152	29.521	0.69354
	1.4002	95.365	1.4385		2.3786	24.618	0.11908		1.4002	31.132	-0.1536
	1.8049	116.05	1.6591		3.1224	34.901	0.054758		1.8049	66.688	0.65948
	2.3786	125.52	1.4824		4.3053	36.609	0.15682		2.3786	92.261	1.8381
	3.1224	152.16	1.5295		5.7043	46.498	0.47205		3.1224	83.652	1.9509
	4.3053	128.73	1.4381		7.3322	60.064	0.94992		4.3053	106.52	2.3637
	5.7043	203.47	1.7832		8.747	68.092	1.5077		5.7043	107.06	3.9509
	7.3322	251.96	3.2791		9.74	71.68	2.757		7.3322	213.58	3.5771
	8.747	357.22	2.7162		1.0369	45.594	1.7703		8.747	296.85	6.5932
	9.74	391.57	3.0215		1.1152	30.869	1.5707		9.74	333.13	5.6305
	1.0369	58.251	1.1304		1.4002	23.962	2.0541		1.0369	-22.905	0.43882
	1.1152	64.935	1.1463		1.8049	22.839	2.117		1.1152	-7.2516	0.50109
	1.4002	70.754	1.039		2.3786	32.5	1.0624		1.4002	-3.3351	0.18682
	1.8049	53.435	1.1694		3.1224	44.119	2.2517		1.8049	18.92	0.88235
	2.3786	59.51	0.82356		4.3053	61.512	2.4925		2.3786	13.15	0.46713
	3.1224	74.05	1.1564		5.7043	51.677	3.0414		3.1224	35.491	0.87578
	4.3053	130.82	1.9084		7.3322	66.105	2.1549		4.3053	60.582	1.2584
	5.7043	149.21	2.2023		8.747	80.628	1.2279		5.7043	17.405	3.2926
	7.3322	183.21	2.7859		9.74	97.691	2.1644		7.3322	83.323	3.7407
	8.747	242.52	3.6843		1.0369	82.838	1.1861		8.747	84.287	5.4002
	9.74	258.37	3.1133		1.1152	72.756	1.196		9.74	56.675	2.9902
	1.0369	63.795	0.21557		1.4002	62.853	0.75433		1.0369	42.423	0.49361
	1.1152	46.378	0.11345		1.8049	89.19	0.51503		1.1152	42.636	0.75742
	1.4002	37.58	0.15945		2.3786	95.307	1.374		1.4002	71.224	0.9448
	1.8049	56.157	0.25419		3.1224	72.77	1.2344		1.8049	58.678	0.92941
	2.3786	94.758	-0.051184		4.3053	125.67	-0.055722		2.3786	65.989	1.1136
	3.1224	69.987	0.19303		5.7043	144.32	1.1383		3.1224	79.541	1.064
	4.3053	78.425	0.30607		7.3322	192.27	1.4104		4.3053	110.31	1.9246
	5.7043	89.954	1.1623		8.747	229.24	1.2619		5.7043	146.83	2.8591
	7.3322	97.616	1.9724		9.74	244.79	2.1221		7.3322	213.51	3.5799
	8.747	133.87	2.3879		1.0369	21.908	0.28523		8.747	284.8	5.4017
	9.74	170.19	2.4673		1.1152	19.523	0.25219		9.74	338.3	5.4056
	1.0369	85.864	2.3195		1.4002	23.763	0.26934		1.0369	9.7256	1.2701
	1.1152	79.307	2.6785		1.8049	24.224	0.1226		1.1152	-2.4738	0.6538
	1.4002	78.53	2.2962		2.3786	30.652	0.22227		1.4002	22.503	0.34745
	1.8049	124.7	3.4485		3.1224	38.116	0.30024		1.8049	7.5346	-0.26198
	2.3786	88.735	2.162		4.3053	35.694	0.41913		2.3786	-11.072	0.47646
	3.1224	113.52	2.7881		5.7043	50.575	0.85884		3.1224	4.8334	0.90224
	4.3053	141.85	2.9271		7.3322	60.187	1.0626		4.3053	40.818	3.8919
	5.7043	210.51	3.2367		8.747	49.99	1.0608		5.7043	27.966	8.2607
	7.3322	252.63	2.7841		9.74	60.002	1.7133		7.3322	42.356	5.8911
	8.747	344.71	5.2282		1.0369	96.018	1.5798		8.747	52.767	8.5994
	9.74	415.14	5.3947		1.1152	67.902	1.2585		9.74	68.195	6.7943
	1.0369	-98.867	0.0037591		1.4002	54.826	1.6888		1.0369	67.602	0.060372
	1.1152	-93.439	0.0062831		1.8049	55.067	1.7263		1.1152	66.431	-0.052648
	1.4002	-73.312	-0.25163		2.3786	71.999	1.8141		1.4002	53.28	0.40491
	1.8049	-81.272	0.16503		3.1224	86.963	1.6278		1.8049	58.434	0.26791
	2.3786	-67.681	-0.23723		4.3053	107.33	1.6872		2.3786	66.147	0.49907
	3.1224	-45.049	-0.016156		5.7043	116.85	1.8683		3.1224	78.303	0.61248
	4.3053	-122.22	0.41509		7.3322	148.85	1.9362		4.3053	86.513	0.9724
	5.7043	-73.385	0.50385		8.747	159.32	3.0348		5.7043	108.42	1.4221
	7.3322	-61.132	0.18095		9.74	162.7	1.6039		7.3322	149.71	2.6168
	8.747	-72.626	1.3592		1.0369	46.41	1.49		8.747	212.61	2.5679
	9.74	-33.454	0.71828		1.1152	30.501	1.2667		9.74	211.26	2.322
	1.0369	120.94	1.3892		1.4002	23.402	1.1254		1.0369	84.49	0.63004
	1.1152	105.37	0.66334		1.8049	24.047	1.3993		1.1152	89.19	0.39473
	1.4002	93.761	1.0439		2.3786	33.095	1.7573		1.4002	109.45	1.0562
	1.8049	134.37	1.0008		3.1224	24.745	0.22906		1.8049	93.408	1.0644
	2.3786	120.72	1.2895		4.3053	52.676	2.5062		2.3786	120.08	1.291
	3.1224	152.17	1.1104		5.7043	62.453	3.2922		3.1224	122.87	1.5855
	4.3053	153.04	0.69899		7.3322	88.431	3.2866		4.3053	177.23	1.3123
	5.7043	249.81	0.80989		8.747	70.731	5.6122		5.7043	236.54	2.2437
	7.3322	294.6	1.4265		9.74	56.307	4.0715		7.3322	261.52	2.8876
	8.747	409.42	2.016		1.0369	94.646	1.1502		8.747	325.42	4.0854
	9.74	577.04	1.7979		1.1152	97.036	1.6097		9.74	406.35	4.3536
	1.0369	47.158	1.2381		1.4002	103.35	1.5173		1.0369	27.076	0.49151
	1.1152	51.203	1.2089		1.8049	109.92	1.0172		1.1152	14.898	0.93371
	1.4002	51.476	1.054		2.3786	108.34	1.3826		1.4002	6.1916	0.39549
	1.8049	55.244	1.3725		3.1224	112.88	0.99446		1.8049	1.6048	0.82185
	2.3786	63.703	1.0765		4.3053	164.66	1.3731		2.3786	-1.2024	1.2995
	3.1224	81.058	1.2472		5.7043	179.37	2.3157		3.1224	-5.6329	3.3689
	4.3053	69.627	1.1471		7.3322	180.72	2.2598		4.3053	42.147	4.803
	5.7043	97.788	1.5		8.747	213.75	3.2144		5.7043	46.151	8.0487
	7.3322	134.05	1.9627		9.74	208.03	2.4362		7.3322	55.449	8.0929
	8.747	173.66	2.4846						8.747	56.825	11.78
	9.74	201.41	2.5649						9.74	61.666	9.4226
	1.0369	-0.34957	5.2229						1.0369	60.17	0.37851
	1.1152	24.458	2.7632						1.1152	93.399	0.68379
	1.4002	7.5903	3.4599						1.4002	99.268	0.4511
	1.8049	30.015	3.7492						1.8049	100.32	0.53613
	2.3786	58.609	4.0978						2.3786	108.67	0.63451
	3.1224	69.129	3.881						3.1224	115.8	0.65678
	4.3053	109.27	5.5976						4.3053	168.45	0.70451
	5.7043	151.84	6.8423						5.7043	173.92	1.0995
	7.3322	132.26	9.7169						7.3322	207.03	0.87217
	8.747	211.33	10.506						8.747	300.11	2.0392
	9.74	240.44	12.117						9.74	325.65	2.2631
	1.0369	28.239	0.00097179						1.0369	7.987	-0.22046
	1.1152	26.745	0.70537						1.1152	22.885	-0.39426
	1.4002	39.284	0.22029						1.4002	25.284	0.35836
	1.8049	41.986	1.1207						1.8049	8.7803	0.51444
	2.3786	44.319	0.65982						2.3786	22.875	0.4167
	3.1224	39.594	0.78544						3.1224	7.8454	0.71716
	4.3053	58.977	1.3727						4.3053	47.959	1.3109
	5.7043	75.002	3.3219						5.7043	35.24	3.0724
	7.3322	63.175	4.739						7.3322	67.666	4.2873
	8.747	89.173	4.9969						8.747	87.942	5.2823
	9.74	105.92	6.8209						9.74	74.25	5.3176
	1.0369	31.76	1.1049						1.0369	167.71	0.92821
	1.1152	35.014	1.3721						1.1152	176.95	1.5369
	1.4002	39.722	1.3375						1.4002	178.9	1.5953
	1.8049	33.393	-1.0379						1.8049	207.69	0.42625
	2.3786	24.399	1.7921						2.3786	215.76	2.3367
	3.1224	42.953	0.99442						3.1224	243.76	2.3759
	4.3053	55.092	1.6172						4.3053	255	1.5591
	5.7043	97.211	3.26						5.7043	278.77	1.6085
	7.3322	120.6	0.98563						7.3322	435.19	2.7166
	8.747	156.87	3.1946						8.747	573.91	3.5446
	9.74	169.23	3.6648						9.74	729.27	4.5398
	1.0369	-7.8704	-0.15759						1.0369	74.701	0.53922
	1.1152	-11.401	-0.36141						1.1152	81.688	0.38629
	1.4002	-12.689	0.069962						1.4002	49.48	0.42606
	1.8049	-10.207	-0.13418						1.8049	62.942	0.62223
	2.3786	-0.25493	-0.31453						2.3786	81.165	0.36501
	3.1224	-11.354	0.060006						3.1224	95.885	0.49299
	4.3053	-3.7512	0.18104						4.3053	135.95	-0.21427
	5.7043	5.5393	0.26025						5.7043	168.7	0.65058
	7.3322	1.2952	1.703						7.3322	261	0.56462
	8.747	-9.4687	0.73993						8.747	321.47	2.4219
	9.74	13.436	1.1572						9.74	361.99	1.6581
	1.0369	31.198	0.10361						1.0369	60.486	0.32183
	1.1152	31.236	0.99071						1.1152	48.307	0.78456
	1.4002	34.395	0.067498						1.4002	60.041	0.4765
	1.8049	40.132	0.67244						1.8049	79.365	0.63015
	2.3786	39.869	0.27342						2.3786	74.641	0.69483
	3.1224	41.247	0.89883						3.1224	130.43	0.943
	4.3053	62.097	0.35574						4.3053	120.62	1.352
	5.7043	86.392	2.5079						5.7043	157.01	1.7222
	7.3322	97.15	3.431						7.3322	232.14	2.9174
	8.747	123.92	5.6241						8.747	312.57	4.0764
	9.74	126.65	7.4539						9.74	350.46	3.3403
	1.0369	9.4418	0.064731						1.0369	111.99	0.37627
	1.1152	6.2545	0.28736						1.1152	113.61	0.20513
	1.4002	-1.2434	0.44947						1.4002	137.59	-0.91322
	1.8049	2.5683	0.14729						1.8049	152.9	-1.9449
	2.3786	2.5534	3.2803						2.3786	178.92	0.71649
	3.1224	-2.4425	0.18188						3.1224	247.15	0.47429
	4.3053	22.373	-0.035022						4.3053	167.64	0.67736
	5.7043	19.854	1.4896						5.7043	256.16	0.99304
	7.3322	25.599	2.8551						7.3322	372.85	2.4126
	8.747	13.066	0.76955						8.747	438.3	5.2069
	9.74	16.418	2.9458						9.74	540.98	5.6556
	1.0369	8.0007	1.6144						1.0369	9.9166	1.3149
	1.1152	8.7141	-0.29375						1.1152	-12.805	1.8117
	1.4002	8.044	-0.12976						1.4002	-11.721	1.0696
	1.8049	13.518	1.8689						1.8049	0.42942	1.8208
	2.3786	11.04	1.7713						2.3786	19.22	2.0332
	3.1224	15.939	1.5628						3.1224	14.947	2.0884
	4.3053	39.063	1.8571						4.3053	14.974	2.8476
	5.7043	60.8	2.3697						5.7043	48.404	1.92
	7.3322	78.271	2.6163						7.3322	105.23	4.4259
	8.747	85.943	5.5552						8.747	103.21	5.6288
	9.74	94.696	5.3279						9.74	134.53	5.8937
	1.0369	21.499	0.84738						1.0369	93.522	0.89353
	1.1152	37.624	0.70602						1.1152	69.175	0.94115
	1.4002	23.59	0.70018						1.4002	39.406	1.5564
	1.8049	32.342	0.34775						1.8049	38.77	1.4832
	2.3786	13.048	0.4888						2.3786	44.599	1.3889
	3.1224	44.37	0.81759						3.1224	69.159	2.2344
	4.3053	50.627	1.5739						4.3053	160.51	3.3252
	5.7043	57.99	4.782						5.7043	181.06	4.8544
	7.3322	68.364	3.5912						7.3322	172.37	5.1303
	8.747	93.174	5.9159						8.747	209.9	6.9938
	9.74	87.888	5.9704						9.74	246.38	5.5629
	1.0369	47.569	-0.24964
	1.1152	52.092	-0.88673
	1.4002	63.4	0.15224
	1.8049	66.749	0.13642
	2.3786	75.837	0.14471
	3.1224	72.777	0.59046
	4.3053	81.775	-0.064486
	5.7043	93.3	1.3848
	7.3322	145.44	1.4341
	8.747	171.37	2.908
	9.74	189.61	3.9692
	1.0369	47.414	-0.20532
	1.1152	41.315	-0.066679
	1.4002	41.037	0.81101
	1.8049	68.374	-0.073779
	2.3786	78.394	0.38787
	3.1224	51.963	1.2635
	4.3053	71.283	0.58335
	5.7043	84.774	0.42097
	7.3322	122.6	2.063
	8.747	158.75	1.6051
	9.74	146.08	3.1016
	1.0369	7.2652	0.26929
	1.1152	16.579	-0.21714
	1.4002	24.392	0.47764
	1.8049	15.991	0.11064
	2.3786	12.246	0.13454
	3.1224	22.239	-0.0072075
	4.3053	18.402	0.45137
	5.7043	22.197	0.68767
	7.3322	26.971	0.87346
	8.747	43.813	1.1287
	9.74	36.261	1.5198
	1.0369	39.986	0.92592
	1.1152	54.177	0.84802
	1.4002	48.325	0.11364
	1.8049	50.113	1.0253
	2.3786	54.141	0.81494
	3.1224	53.009	1.8514
	4.3053	67.102	1.5231
	5.7043	71.495	2.6887
	7.3322	100.05	5.0862
	8.747	119.75	6.0279
	9.74	150.96	7.3007
	1.0369	-10.569	0.12106
	1.1152	-7.3589	0.12268
	1.4002	4.8502	-0.096602
	1.8049	0.46013	0.2745
	2.3786	2.404	0.13447
	3.1224	2.3078	-0.0043034
	4.3053	-0.86146	2.3054
	5.7043	7.2511	4.1775
	7.3322	2.7881	4.7864
	8.747	7.0505	7.0426
	9.74	13.967	5.2909
	1.0369	-10.489	0.22588
	1.1152	-17.904	-0.068597
	1.4002	1.3737	-0.28266
	1.8049	-6.3253	-0.33726
	2.3786	-5.4869	-0.098553
	3.1224	-2.7948	-0.25004
	4.3053	5.7952	1.0085
	5.7043	4.5939	4.4295
	7.3322	11.835	5.9957
	8.747	6.4283	5.5946
	9.74	11.614	4.0973
	1.0369	29.514	0.83126
	1.1152	35.657	1.6263
	1.4002	29.536	1.4714
	1.8049	34.485	2.3401
	2.3786	42.83	1.3718
	3.1224	39.976	0.82248
	4.3053	52.864	3.255
	5.7043	67.188	3.8218
	7.3322	81.464	4.1318
	8.747	96.631	8.1617
	9.74	112.13	7.8277
	1.0369	34.043	1.1898
	1.1152	36.561	0.77392
	1.4002	29.078	0.31259
	1.8049	30.26	0.92048
	2.3786	46	1.0231
	3.1224	33.769	0.75442
	4.3053	64.723	1.3077
	5.7043	61.843	1.1567
	7.3322	66.51	-0.070837
	8.747	81.328	3.2414
	9.74	73.793	1.7418
	1.0369	14.563	1.819
	1.1152	10.026	0.44024
	1.4002	12.789	2.4902
	1.8049	16.544	2.3437
	2.3786	15.269	0.58617
	3.1224	26.948	1.2906
	4.3053	36.374	0.021792
	5.7043	34.692	2.2806
	7.3322	44.654	3.9036
	8.747	54.572	2.9677
	9.74	59.789	5.3032
	1.0369	1.1644	2.9211
	1.1152	0.55034	4.9928
	1.4002	1.712	3.0737
	1.8049	12.368	3.1209
	2.3786	-6.7817	1.6576
	3.1224	8.2673	1.2368
	4.3053	15.419	3.3593
	5.7043	20.676	5.0296
	7.3322	44.549	4.5514
	8.747	49.23	7.4796
	9.74	52.92	7.5036
	1.0369	8.5223	0.21796
	1.1152	0.47544	-0.030665
	1.4002	11.67	-0.099511
	1.8049	14.817	0.10736
	2.3786	5.1037	0.097831
	3.1224	8.4234	0.064284
	4.3053	26.238	0.19461
	5.7043	25.928	1.2366
	7.3322	30.141	2.6858
	8.747	37.45	3.714
	9.74	40.652	4.0599
	1.0369	41.519	0.31173
	1.1152	29.4	0.61703
	1.4002	31.015	0.045849
	1.8049	28.293	-0.11087
	2.3786	34.388	0.14904
	3.1224	35.971	0.1206
	4.3053	57.442	0.98527
	5.7043	46.416	3.1425
	7.3322	78.816	9.1971
	8.747	62.21	7.1809
	9.74	49.423	6.043

## Sheet: ZAP70 no B2m
	These are all the single cell ZAP70 measurements comprising Figure 4–figure supplement 3 (top row).
	ZAP70 data set 1				ZAP70 data set 2
	LOV2 half-life (sec)	CAR occupancy	ZAP70 recruitment (raw TIRF561)		LOV2 half-life (sec)	CAR occupancy	ZAP70 recruitment (raw TIRF561)
	1.1152	-60.771	181.17		1.1152	553.06	436.16
	1.4002	-222.13	193.38		1.4002	402.08	388.33
	1.8049	-364.65	189.89		1.8049	406.5	410.82
	2.3786	-359.09	188.79		2.3786	359.35	378.01
	3.1224	-262.19	201.9		3.1224	263.25	377.76
	4.3053	-296.56	183.86		4.3053	414.97	385.18
	5.7043	60.004	240.68		5.7043	1102.2	667.04
	7.3322	218.56	268.27		7.3322	1371.5	643.66
	8.747	589.57	314.61		8.747	2039.2	722.12
	9.74	579.84	344.93		9.74	2098.4	702.09
	1.1152	-25.408	200.56		1.1152	396.68	342.2
	1.4002	-66.466	209.35		1.4002	562.57	315.19
	1.8049	-36.042	202.91		1.8049	737.32	326.73
	2.3786	47.401	184.31		2.3786	592.98	310.78
	3.1224	106.53	204.93		3.1224	725.33	340.43
	4.3053	-10.963	206.11		4.3053	486.7	327.98
	5.7043	191.4	255.96		5.7043	868.77	615.92
	7.3322	277.25	282.33		7.3322	1054.7	593.91
	8.747	436.46	297.64		8.747	1114	655.27
	9.74	482.24	375.97		9.74	1248.7	672.13
	1.1152	-12.416	345.11		1.1152	322	562.39
	1.4002	-398.8	350.15		1.4002	460.89	603.16
	1.8049	-279.07	334.51		1.8049	585.8	595.55
	2.3786	-82.967	347.36		2.3786	743.77	581.51
	3.1224	-175.31	352.88		3.1224	619.39	623.23
	4.3053	-291.78	276.08		4.3053	265.57	588.95
	5.7043	567.69	464.06		5.7043	941.3	903.47
	7.3322	882.1	608.23		7.3322	965.99	884.51
	8.747	1169	683.42		8.747	1243.8	876.3
	9.74	1500.6	715.19		9.74	1394.5	994.44
	1.1152	-74.593	178.19		1.1152	143.21	444.67
	1.4002	10.133	166.13		1.4002	240.75	439.73
	1.8049	376.42	175.87		1.8049	182.45	429.88
	2.3786	516.23	188.78		2.3786	259.04	389.73
	3.1224	388.88	185.84		3.1224	325.94	410.2
	4.3053	-251.33	160.43		4.3053	152.45	442.32
	5.7043	970.01	201.04		5.7043	965.67	608.94
	7.3322	1292.1	244.93		7.3322	952.06	603.13
	8.747	1386.6	237.39		8.747	880.92	640.01
	9.74	2119	317.04		9.74	1296.4	679.66
	1.1152	161.68	182.71		1.1152	488.71	431.28
	1.4002	136.22	161.75		1.4002	365.93	395.75
	1.8049	160.76	158.86		1.8049	344.44	372.94
	2.3786	154.5	142.37		2.3786	397.25	399.99
	3.1224	201.25	161.61		3.1224	368.71	350.42
	4.3053	42.538	174.6		4.3053	395.99	413
	5.7043	549.01	220.12		5.7043	948.96	570.7
	7.3322	587.02	260.4		7.3322	1137.6	487.81
	8.747	1005.2	294.69		8.747	1559.4	654.9
	9.74	1465.8	344.73		9.74	1738.7	637.52
	1.1152	-175.37	82.409		1.1152	233.33	326.17
	1.4002	2.7892	90.159		1.4002	-60.952	321.86
	1.8049	-61.353	124.26		1.8049	141.65	290.81
	2.3786	-69.997	137.66		2.3786	80.485	305.49
	3.1224	90.268	155.81		3.1224	318.73	307.5
	4.3053	-285.92	104.05		4.3053	58.817	323.99
	5.7043	182.17	235.5		5.7043	485.94	475.89
	7.3322	744.45	368.88		7.3322	794.65	513.87
	8.747	1438	377.21		8.747	1006.4	551.92
	9.74	1924.1	388.55		9.74	1267	546.24
	1.1152	1121.4	230.82		1.1152	57.806	284.44
	1.4002	617.71	200.62		1.4002	15.36	328.95
	1.8049	463.39	202.06		1.8049	189.3	377.93
	2.3786	458.32	179.22		2.3786	252.33	403.01
	3.1224	591.53	196.16		3.1224	584.39	436.26
	4.3053	737.95	220.62		4.3053	13.933	308.34
	5.7043	943.69	259.96		5.7043	610.39	494.41
	7.3322	1077.9	307.2		7.3322	1491.1	607.97
	8.747	1955.4	344.66		8.747	1592.9	561.44
	9.74	2149.5	367.86		9.74	3353.9	689.65
	1.1152	419.46	187.07		1.1152	92.292	558.4
	1.4002	401.67	263.04		1.4002	-56.637	516.42
	1.8049	515.37	334.56		1.8049	100.11	536.88
	2.3786	901.86	306.66		2.3786	49.738	530.56
	3.1224	816.68	344.39		3.1224	19.411	435.26
	4.3053	457.7	202.74		4.3053	-24.168	578.81
	5.7043	1032.9	394.63		5.7043	105.48	934.8
	7.3322	1595.9	437.06		7.3322	670.47	855.12
	8.747	2013	468.94		8.747	942.65	1152.8
	9.74	3201.2	545.97		9.74	1057.6	1283.4
	1.1152	69.551	175.83		1.1152	-53.474	362.35
	1.4002	44.841	157.47		1.4002	-178.24	353.7
	1.8049	39.309	146.34		1.8049	285.13	319.36
	2.3786	235.35	160.87		2.3786	908.19	308.74
	3.1224	-231.91	177.36		3.1224	728.94	305.77
	4.3053	110.22	169.53		4.3053	-285.51	342.07
	5.7043	224.18	204.26		5.7043	972.36	482.61
	7.3322	455.37	270.8		7.3322	1502.6	435.27
	8.747	893.49	256.49		8.747	1966.2	458.38
	9.74	765.98	243.99		9.74	2312	473.12
	1.1152	1929.1	281.45		1.1152	272.15	382.56
	1.4002	795.31	261.08		1.4002	275.83	329.71
	1.8049	1099.6	306.31		1.8049	252.79	344.67
	2.3786	1258.2	332.68		2.3786	221.32	363.13
	3.1224	1234.9	335.9		3.1224	330.3	334.58
	4.3053	1162.6	280.21		4.3053	187.46	319.65
	5.7043	1943.1	408.48		5.7043	768.02	403.15
	7.3322	2222.6	489.18		7.3322	1065.9	415.78
	8.747	2994.1	525.29		8.747	1640.3	461.57
	9.74	4044.6	489		9.74	1884.2	447.47
	1.1152	448.77	220.79		1.1152	-29.025	257.96
	1.4002	253.51	183.73		1.4002	125.79	261.87
	1.8049	239.67	174.45		1.8049	40.772	245.55
	2.3786	413.97	193.2		2.3786	-50.013	245.09
	3.1224	421.55	180.99		3.1224	5.9598	265.73
	4.3053	376.57	201.94		4.3053	68.542	270.23
	5.7043	771.16	272.19		5.7043	151.62	336.95
	7.3322	1018.1	276.48		7.3322	364.76	360.1
	8.747	1329.8	289.1		8.747	500.09	396.35
	9.74	2150.8	299.05		9.74	585.69	452.32
	1.1152	172.57	271.86		1.1152	409.49	333.24
	1.4002	77.72	255.55		1.4002	53.102	358.84
	1.8049	20.49	260.3		1.8049	-43.05	348.43
	2.3786	48.743	253.25		2.3786	117.27	344.14
	3.1224	82.831	308.69		3.1224	345.18	341.04
	4.3053	114.94	283.77		4.3053	450.92	318.28
	5.7043	331.75	284.2		5.7043	950.9	429
	7.3322	497.03	307.31		7.3322	565.18	450.64
	8.747	793.37	358.76		8.747	936.05	493.62
	9.74	931.36	380.86		9.74	1284.1	485.41
	1.1152	1294.2	862.43		1.1152	1191.9	408.63
	1.4002	647.95	771.31		1.4002	1140.5	389.12
	1.8049	374.63	819.98		1.8049	395.86	413.56
	2.3786	393.78	727.72		2.3786	717.26	410
	3.1224	472.42	755.71		3.1224	870.93	494.19
	4.3053	766.32	807.27		4.3053	1334.9	384.42
	5.7043	892.59	1042.2		5.7043	1210.6	671.01
	7.3322	1061.6	1066		7.3322	1165.4	685.2
	8.747	1715.7	1191.6		8.747	1817.3	943.92
	9.74	2822.6	1277.8		9.74	2557	1180.8
	1.1152	205.43	526.71		1.1152	518.94	644.92
	1.4002	46.334	531.89		1.4002	478.67	654.14
	1.8049	69.447	533.96		1.8049	323.43	584.6
	2.3786	246.99	437.55		2.3786	552.31	537.96
	3.1224	133.04	499.87		3.1224	493.66	458.64
	4.3053	58.879	520.29		4.3053	396.06	619.52
	5.7043	605.6	654.63		5.7043	1288.9	923.5
	7.3322	851.73	709.33		7.3322	1046.7	778.11
	8.747	1249.9	755.72		8.747	1749.4	840.01
	9.74	1726.5	761.24		9.74	2481.7	815.41
	1.1152	1532	374.96		1.1152	159.24	315.58
	1.4002	865.62	358.63		1.4002	243.3	312.2
	1.8049	368.04	276.63		1.8049	432.72	269.23
	2.3786	269.42	282.9		2.3786	220.95	264.59
	3.1224	234.84	337.43		3.1224	180.81	263.05
	4.3053	757.34	336.69		4.3053	307.51	342.14
	5.7043	710.5	408.17		5.7043	461.24	374.76
	7.3322	899.77	524.71		7.3322	1106.3	432.03
	8.747	1098.1	548.23		8.747	1270.8	509.41
	9.74	1557.8	565.99		9.74	1141.8	402.58
	1.1152	-281.21	262.08		1.1152	-36.5	170.76
	1.4002	-227.88	258.2		1.4002	109.12	180.32
	1.8049	-485.81	266.18		1.8049	156.56	178.86
	2.3786	-331.78	266.24		2.3786	158.46	183.79
	3.1224	-32.156	282.97		3.1224	56.525	182.7
	4.3053	-302.04	267.38		4.3053	-7.4825	182.3
	5.7043	328.43	302.51		5.7043	323.23	268.3
	7.3322	-80.522	384.62		7.3322	697.82	313.75
	8.747	1060.3	408.03		8.747	793.42	333.55
	9.74	1038.2	381.84		9.74	639.24	332.8
	1.1152	334.09	441.15		1.1152	206.34	249.04
	1.4002	32.32	402.36		1.4002	273.89	264.72
	1.8049	456.75	421.96		1.8049	266.59	235.8
	2.3786	15.994	372.29		2.3786	226.49	190.32
	3.1224	313.53	394.48		3.1224	241.12	199.61
	4.3053	30.987	401.34		4.3053	203.43	271.34
	5.7043	280.96	455.45		5.7043	898.41	349.25
	7.3322	315.56	510.91		7.3322	828.52	369.96
	8.747	590.45	546.69		8.747	1103	381.97
	9.74	882.34	531.62		9.74	1130.1	486.71
	1.1152	341.2	498.8		1.1152	80.454	271.79
	1.4002	-46.964	417.05		1.4002	-13.014	270.32
	1.8049	-1.2304	471.9		1.8049	-5.4114	258.73
	2.3786	-97.55	396.74		2.3786	70.787	240.72
	3.1224	32.309	398.97		3.1224	51.155	257.78
	4.3053	-53.389	408.24		4.3053	-158.11	293.1
	5.7043	251.99	500.53		5.7043	376.2	355.04
	7.3322	443.81	621.9		7.3322	633.59	375.99
	8.747	1165.7	693.28		8.747	930.07	364.78
	9.74	1471	585.17		9.74	1253.1	415.65
	1.1152	1348.5	323.2		1.1152	209	182.78
	1.4002	745.79	294.98		1.4002	232.32	164.74
	1.8049	720.85	343.67		1.8049	216.94	155.12
	2.3786	530.49	321.39		2.3786	254.25	143.91
	3.1224	423.84	379.38		3.1224	213.08	152.58
	4.3053	948.58	320.85		4.3053	146.86	160.07
	5.7043	1640.3	385.39		5.7043	224.1	181.39
	7.3322	1756.3	481.12		7.3322	238.21	191.78
	8.747	1891.6	473.49		8.747	351.12	215.8
	9.74	1868.9	587.81		9.74	287.98	225.61
	1.1152	-98.362	291.45		1.1152	-24.771	262.89
	1.4002	220.79	275.37		1.4002	76.898	241.15
	1.8049	-289.26	293.51		1.8049	112.99	229.56
	2.3786	-192.1	290.69		2.3786	114.28	221.56
	3.1224	-225.86	318.02		3.1224	324.76	246.03
	4.3053	-35.145	303.32		4.3053	1.2347	258.23
	5.7043	189.48	368.57		5.7043	311.44	239.88
	7.3322	505.94	405.55		7.3322	659.92	272.48
	8.747	982.04	430.59		8.747	713.24	258.06
	9.74	806.48	477.19		9.74	791.16	259.96
	1.1152	125.13	199.18		1.1152	140.28	353.29
	1.4002	76.268	176.63		1.4002	34.796	417.79
	1.8049	-6.9998	191.52		1.8049	77.941	394.11
	2.3786	63.838	191.81		2.3786	79.056	350.25
	3.1224	295.43	217.22		3.1224	175.61	373.8
	4.3053	201.89	182.26		4.3053	88.824	412.19
	5.7043	331.17	219.42		5.7043	400.22	380.03
	7.3322	643.84	277.56		7.3322	522.83	373.52
	8.747	925.68	291.98		8.747	828.32	428.47
	9.74	1071.2	306.61		9.74	900.07	465.36
	1.1152	415.87	141.5		1.1152	84.471	250.36
	1.4002	177.23	141.59		1.4002	-60.441	243.89
	1.8049	312.54	169.91		1.8049	4.6282	238.09
	2.3786	562.38	155.07		2.3786	38.104	224.89
	3.1224	498.84	184.63		3.1224	88.588	213.06
	4.3053	295.04	152.26		4.3053	-68.602	269.25
	5.7043	463.75	155.32		5.7043	159.45	274.71
	7.3322	597.09	196.8		7.3322	365.23	283.3
	8.747	903.53	209.57		8.747	444.15	287.42
	9.74	971.17	233.81		9.74	732.93	368.41
	1.1152	121.75	200.67		1.1152	-128.11	252.67
	1.4002	30.683	196.85		1.4002	-68.313	242.46
	1.8049	-66.037	237.05		1.8049	-41.589	221.73
	2.3786	77.815	182.38		2.3786	-24.778	230.4
	3.1224	131.11	215.55		3.1224	19.802	228.35
	4.3053	-5.2307	205.92		4.3053	-115.82	232.63
	5.7043	200.24	259.89		5.7043	71.53	266.44
	7.3322	325.83	227.26		7.3322	102.75	275.78
	8.747	292.92	211.94		8.747	220.17	275.59
	9.74	333.89	281.26		9.74	332.9	284.11
	1.1152	26.436	209.43		1.1152	283.04	152.4
	1.4002	99.654	221.08		1.4002	224.78	141.95
	1.8049	188.45	235.68		1.8049	282.1	141.17
	2.3786	186.08	232.52		2.3786	287.11	153.38
	3.1224	306.19	229.06		3.1224	295.38	145.53
	4.3053	125.1	235.31		4.3053	278.99	155.17
	5.7043	612	304.13		5.7043	376.24	174.66
	7.3322	677.12	323.01		7.3322	448.2	196.17
	8.747	1122.4	334.02		8.747	635.61	212.68
	9.74	1679.4	367.7		9.74	1039.6	215.6
	1.1152	174.26	229.47		1.1152	127.16	165.21
	1.4002	113.62	214.69		1.4002	235.2	147.13
	1.8049	169.71	183.96		1.8049	246.52	140.96
	2.3786	170.09	197.42		2.3786	348.15	128.32
	3.1224	205.14	204.77		3.1224	392.13	124.41
	4.3053	101.54	210.23		4.3053	206.34	151.69
	5.7043	218.73	219.09		5.7043	363.98	134.71
	7.3322	635.56	243.55		7.3322	660.85	143.47
	8.747	1074.4	259.26		8.747	1039.2	144.14
	9.74	1905.1	327.17		9.74	927.29	147.18
	1.1152	-2.0196	165.46		1.1152	134.43	206.57
	1.4002	33.855	158.33		1.4002	165.4	193.54
	1.8049	-35.212	133.92		1.8049	-43.797	175.66
	2.3786	5.5832	137.18		2.3786	-23.875	174.7
	3.1224	29.38	145.38		3.1224	112.9	157.98
	4.3053	-1.042	169.12		4.3053	67.678	191.65
	5.7043	-15.672	140.53		5.7043	276.82	185.15
	7.3322	8.2691	138.35		7.3322	277.96	193.28
	8.747	18.277	187.6		8.747	569.08	194.12
	9.74	75.338	183.92		9.74	164.34	207.55
	1.1152	18.808	136.8		1.1152	193.86	258.66
	1.4002	46.307	126.85		1.4002	214.77	258.14
	1.8049	55.861	125.89		1.8049	214.69	235.43
	2.3786	33.158	102.37		2.3786	221.47	237.71
	3.1224	59.916	100.74		3.1224	302.64	246.21
	4.3053	9.6844	123.07		4.3053	247.24	270.41
	5.7043	83.328	121.78		5.7043	297.39	227.15
	7.3322	27.802	122.24		7.3322	401.89	223.58
	8.747	62.482	148.88		8.747	521.8	230.13
	9.74	107.68	142.15		9.74	721.03	244.84
	1.1152	3.0337	134.85		1.1152	448.28	175.75
	1.4002	-29.398	143.46		1.4002	480.1	184.92
	1.8049	25.299	139.47		1.8049	392.66	158.79
	2.3786	-3.0628	127.13		2.3786	484.13	168.97
	3.1224	11.78	133.09		3.1224	209.56	138.85
	4.3053	2.1488	139.96		4.3053	430.11	176.95
	5.7043	43.579	137.7		5.7043	337.54	163.7
	7.3322	55.361	130.99		7.3322	532.03	193.61
	8.747	134.64	161.87		8.747	693.03	199.26
	9.74	142.49	167.8		9.74	1041.1	225.29
	1.1152	-18.372	145.83		1.1152	259.54	303.12
	1.4002	15.711	137.1		1.4002	137.03	278.49
	1.8049	-36.919	136.11		1.8049	236.15	248.89
	2.3786	-31.788	138.12		2.3786	180.64	204.89
	3.1224	16.161	146.64		3.1224	261.6	251.62
	4.3053	19.789	144.96		4.3053	251.57	314.06
	5.7043	58.492	144.44		5.7043	322.48	263.3
	7.3322	6.6194	148.14		7.3322	486.37	274.28
	8.747	180.63	172.7		8.747	712.8	249.77
	9.74	235.48	192.64		9.74	865.51	277.13
	1.1152	35.653	133.23		1.1152	23.481	243.17
	1.4002	50.551	145.58		1.4002	45.393	280.8
	1.8049	31.671	128.62		1.8049	23.024	256.36
	2.3786	40.681	136.55		2.3786	52.44	259.31
	3.1224	53.453	135.92		3.1224	56.192	276.82
	4.3053	28.171	134.05		4.3053	26.109	255.03
	5.7043	56.181	147.68		5.7043	118.59	290.28
	7.3322	73.769	154.13		7.3322	323.18	317.57
	8.747	136.4	174.05		8.747	451.75	358.16
	9.74	186.62	185.69		9.74	800.07	407.91
	1.1152	54.132	199.56		1.1152	288.61	260.86
	1.4002	78.708	170.31		1.4002	213.49	233.14
	1.8049	55.284	162.7		1.8049	166.1	217.82
	2.3786	49.531	172.41		2.3786	156.46	219.2
	3.1224	58.879	182.08		3.1224	91.262	191.8
	4.3053	90.63	182.23		4.3053	82.769	236.39
	5.7043	37.258	167.69		5.7043	178.78	241.8
	7.3322	48.615	170.03		7.3322	544.66	280.07
	8.747	111.43	196.16		8.747	558.44	291.39
	9.74	125.56	198.66		9.74	795.67	270.41
	1.1152	84.95	114.97		1.1152	-57.639	372.63
	1.8049	-17.977	166.17		1.4002	-145.15	389.67
	2.3786	49.161	171.19		1.8049	-97.451	355.71
	3.1224	15.236	171.99		2.3786	-116	380.82
	4.3053	-22.18	111.72		3.1224	-75.998	381.77
	5.7043	9.2256	191.11		4.3053	119.25	337.77
	7.3322	93.672	198.55		5.7043	581.67	344.06
	8.747	162.47	239.35		7.3322	564.67	361.06
	9.74	371.86	211.99		8.747	819.09	356.97
	1.1152	-5.7955	314.64		9.74	974.04	388.07
	1.4002	-26.817	294.95		1.1152	174.98	245.33
	1.8049	-19.366	277.76		1.4002	128.15	195.96
	2.3786	31.862	287.92		1.8049	121.15	181.61
	3.1224	46.926	280.71		2.3786	180.7	196.89
	4.3053	-21.264	294.57		3.1224	144.83	168.99
	5.7043	98.088	327.6		4.3053	-6.6381	198.28
	7.3322	201.57	379.61		5.7043	368.7	193.04
	8.747	353.63	410.25		7.3322	692.07	240.53
	9.74	519.23	397.21		8.747	1058.2	260.58
	1.1152	39.684	120.71		9.74	1513.2	266.92
	1.4002	27.532	126.69		1.1152	199.69	154.33
	1.8049	6.9368	103.77		1.4002	249.71	136.33
	2.3786	6.2851	118.88		1.8049	233.88	125.19
	3.1224	-5.2967	108.49		2.3786	286.44	132.46
	4.3053	25.725	115		3.1224	220.07	122.4
	5.7043	61.754	124.82		4.3053	238.78	153.12
	7.3322	76.09	148.05		5.7043	298.7	137.8
	8.747	156.96	196.24		7.3322	598.35	138.68
	9.74	264.12	179.26		8.747	581.63	151.03
	1.1152	161.06	253.7		9.74	804.48	164.1
	1.4002	91.64	222.7		1.1152	-110.91	189.52
	1.8049	104.57	211.71		1.4002	-171.13	192.11
	2.3786	73.347	202.36		1.8049	46.546	183.26
	3.1224	168.46	200.3		2.3786	91.241	184.18
	4.3053	118.42	228.24		3.1224	116.46	177.91
	5.7043	174.79	214.66		4.3053	33.124	181.55
	7.3322	132.86	226.28		5.7043	342.01	196.55
	8.747	157.84	246.07		7.3322	287.47	201.69
	9.74	396.16	266.1		8.747	532.5	225.99
	1.1152	147.53	247.48		9.74	628.88	218.84
	1.4002	154.7	242.81		1.1152	136.29	249.9
	1.8049	135.38	231.3		1.4002	139.29	260.41
	2.3786	148.51	237.1		1.8049	166.11	235.7
	3.1224	192.16	296.68		2.3786	179.87	256.28
	4.3053	152.34	221.52		3.1224	163.36	226.53
	5.7043	289.28	274.96		4.3053	152.68	234.99
	7.3322	406.55	345.93		5.7043	292.91	250.77
	8.747	649.56	386.74		7.3322	286.48	271.06
	9.74	768.7	327.32		8.747	420.41	268.14
	1.1152	121.8	162.48		9.74	702.26	288.58
	1.4002	105.98	157.77		1.1152	140.48	235.87
	1.8049	98.367	155.19		1.4002	60.708	222.16
	2.3786	93.051	152.19		1.8049	76.566	200.83
	3.1224	147.49	158.33		2.3786	18.799	196.39
	4.3053	136.55	151.77		3.1224	86.625	203.3
	5.7043	123.57	133.09		4.3053	84.068	221.73
	7.3322	210.79	175.73		5.7043	195.88	243.13
	8.747	380.35	197.34		7.3322	209.29	209.74
	9.74	586.4	189.86		8.747	274.85	234.9
	1.1152	57.237	203.48		9.74	331.84	225.69
	1.4002	46.237	166.3		1.1152	-55.133	208.99
	1.8049	87.46	152.49		1.4002	-62.138	199.2
	2.3786	54.783	159.88		1.8049	7.9914	202.28
	3.1224	4.2684	143.81		2.3786	28.564	170.89
	4.3053	84.29	171.54		3.1224	0.71807	172.44
	5.7043	81.844	163.75		4.3053	-33.354	203.81
	7.3322	135.75	196.34		5.7043	35.876	181.95
	8.747	280.63	190.24		7.3322	-4.2544	181.75
	9.74	435.62	206.86		8.747	23.609	194.66
	1.1152	70.648	282.35		9.74	72.255	213.85
	1.4002	80.893	233.02		1.1152	74.184	187.38
	1.8049	139.77	239.82		1.4002	23.921	166.22
	2.3786	42.709	249.35		1.8049	59.83	172.43
	3.1224	130.81	244.16		2.3786	12.449	140.86
	4.3053	31.862	243.99		3.1224	77.713	167.34
	5.7043	256.43	334.87		4.3053	88.828	169.2
	7.3322	256.84	373.7		5.7043	102.72	166.93
	8.747	525.83	425.45		7.3322	139.12	156.4
	9.74	746.44	388.53		8.747	157.99	163.37
	1.1152	129.79	200.97		9.74	166.31	162.2
	1.4002	124.03	182.45		1.1152	8.2784	152.64
	1.8049	99.841	192.15		1.4002	80.588	178.35
	2.3786	83.53	183.33		1.8049	52.844	176.83
	3.1224	12.139	184.49		2.3786	120.7	169.59
	4.3053	113.9	185.39		3.1224	170.13	174.72
	5.7043	180.19	234.6		4.3053	39.998	154.21
	7.3322	199.47	226		5.7043	314.27	200.01
	8.747	350.1	309.48		7.3322	488.99	192.94
	9.74	478.73	269.81		8.747	491.8	205.01
	1.1152	57.736	323.85		9.74	695.83	212.92
	1.4002	-14.437	318.79		1.1152	-39.677	126.77
	1.8049	73.722	300.95		1.4002	-70.69	112.68
	2.3786	99.189	308.74		1.8049	-126.21	129.63
	3.1224	36.943	324.42		2.3786	-40.907	119.04
	4.3053	58.109	306.19		3.1224	-26.111	120.94
	5.7043	275.2	455.47		4.3053	-74.239	116.17
	7.3322	380.27	520.8		5.7043	-25.611	137.29
	8.747	501.08	560.4		7.3322	-10.604	138.88
	9.74	871.01	561.01		8.747	34.453	157.28
	1.1152	-44.678	326.89		9.74	20.989	174
	1.4002	0.33974	293.77		1.1152	57.401	151.56
	1.8049	-17.564	281.89		1.4002	32.051	154.82
	2.3786	101.29	297.9		1.8049	56.579	134.63
	3.1224	-53.639	370.14		2.3786	83.541	125.65
	4.3053	-43.031	304.03		3.1224	85.964	129.19
	5.7043	-30.342	306.11		4.3053	16.484	145.49
	7.3322	155.02	321.84		5.7043	85.457	159.84
	8.747	255.94	387.96		7.3322	139.42	163.7
	9.74	315.12	380.05		8.747	169.64	163.73
	1.1152	34.726	146.54		9.74	243.97	172.75
	1.4002	59.949	188.14		1.1152	98.423	178.33
	1.8049	42.026	178.98		1.4002	67.386	160.37
	2.3786	27.994	174.32		1.8049	124.68	182.17
	3.1224	60.814	195.38		2.3786	81.352	154.12
	4.3053	58.478	184.04		3.1224	130.37	148.98
	5.7043	83.607	198.63		4.3053	93.917	156.81
	7.3322	163.43	252.26		5.7043	248.38	165.55
	8.747	231.13	267.07		7.3322	264.76	176.43
	9.74	368.02	283.82		8.747	730.31	180.19
	1.1152	109.18	254.61		9.74	613.48	157.15
	1.4002	118.39	233.67		1.1152	14.73	128.2
	1.8049	114.06	257.7		1.4002	-46.345	134.7
	2.3786	115.17	250.86		1.8049	-16.298	118.73
	3.1224	170.04	265.97		2.3786	1.0477	108.67
	4.3053	102.25	232.86		3.1224	27.132	113.03
	5.7043	154.62	225.67		4.3053	-26.482	123.16
	7.3322	176.17	265.3		5.7043	99.441	126.37
	8.747	285.27	280.11		7.3322	275.58	122.64
	9.74	363.87	269.8		8.747	202.5	130.33
	1.1152	218.22	238.76		9.74	332.04	125.65
	1.4002	135.44	214.47		1.1152	30.419	77.03
	1.8049	164.54	211.79		1.4002	1.3884	68.669
	2.3786	129.29	218.29		1.8049	25.871	76.046
	3.1224	122.49	222.08		2.3786	60.785	67.227
	4.3053	165.76	226.09		3.1224	12.275	66.756
	5.7043	240.24	235.6		4.3053	-1.6776	80.666
	7.3322	270.44	258.32		5.7043	103.08	77.296
	8.747	414.56	283		7.3322	121.7	81.838
	9.74	672.8	272.09		8.747	126.26	85.426
	1.1152	-7.1151	206.13		9.74	113.11	88.234
	1.8049	91.465	215.14		1.1152	59.871	128.24
	2.3786	94.132	226.49		1.4002	34.038	139.69
	3.1224	117.26	235.42		1.8049	13.566	139.39
	4.3053	8.5298	183.16		2.3786	38.927	143.7
	5.7043	115.55	208.64		3.1224	50.392	143.03
	7.3322	132.48	244.58		4.3053	86.586	161.82
	8.747	178.69	295.19		5.7043	132.37	135.97
	9.74	186.1	284.77		7.3322	140.92	121.98
	1.1152	99.181	154.86		8.747	402.76	151.01
	1.4002	50.918	126		9.74	506.25	156.13
	1.8049	96.361	186.34		1.1152	107.24	169.99
	2.3786	79.38	202.32		1.4002	101.77	175.71
	3.1224	90.066	207.45		1.8049	111.8	181.24
	4.3053	19.044	142.6		2.3786	110.26	127.76
	5.7043	155.75	273.23		3.1224	120.11	149
	7.3322	301.12	311.99		4.3053	120.94	161.17
	8.747	537.03	310.51		5.7043	195.94	153.92
	9.74	583.76	313.79		7.3322	214.18	145.2
	1.1152	38.952	279.41		8.747	263.2	174.66
	1.4002	28.34	317.46		9.74	465.29	188
	1.8049	87.968	309.9		1.1152	-2.0438	239.1
	2.3786	58.469	305.01		1.4002	-53.692	268.83
	3.1224	74.143	286.88		1.8049	-50.374	265.19
	4.3053	41.937	267.23		2.3786	-15.818	273.74
	5.7043	156.36	350.02		3.1224	-83.108	248.05
	7.3322	145.43	390.75		4.3053	-18.373	255.87
	8.747	340.53	345.7		5.7043	-2.8175	221.64
	9.74	380.51	378.34		7.3322	32.784	295.52
	1.4002	-144.2	125.13		8.747	62.265	258.15
	1.8049	-106.48	149.11		9.74	221.31	252.37
	2.3786	13.29	159.82		1.1152	94.22	136.55
	3.1224	123.43	174.56		1.4002	89.027	120.92
	4.3053	20.895	131.91		1.8049	101.42	114.63
	5.7043	185.1	197.84		2.3786	100.67	102.73
	7.3322	205.62	242.75		3.1224	74.269	108.27
	8.747	384.25	274.6		4.3053	107.3	122.6
	9.74	1080.8	265.5		5.7043	227.27	127.46
	1.1152	141.16	174.95		7.3322	237.28	126.15
	1.4002	125.22	166.46		8.747	259.66	141.9
	1.8049	124.22	145.7		9.74	397.99	138.92
	2.3786	115.09	145.71		1.1152	73.293	279.9
	3.1224	153.78	138.64		1.4002	149.95	300.61
	4.3053	137.15	156.37		1.8049	92.843	316.64
	5.7043	149.6	155.81		2.3786	146.68	280.72
	7.3322	213.37	153.42		3.1224	182.32	281.56
	8.747	386.78	165.74		4.3053	113.8	275.23
	9.74	591.38	179.66		5.7043	174.48	262.82
	1.1152	253.3	150.08		7.3322	255.77	282.84
	1.4002	194.31	132.04		8.747	386.4	323.96
	1.8049	172.52	118.83		9.74	534.45	321.61
	2.3786	167.98	121.03		1.1152	165.15	259.58
	3.1224	154.59	125.43		1.4002	127.45	373.1
	4.3053	144.69	137.4		1.8049	1.0033	281.5
	5.7043	289.05	143.45		2.3786	43.653	252.14
	7.3322	226.47	154.81		3.1224	5.3513	276.67
	8.747	423.15	152.78		4.3053	146.7	332.06
	9.74	537.61	147.26		5.7043	198.63	304.75
	1.1152	122.57	196.43		7.3322	32.7	266.57
	1.4002	-44.697	160.77		8.747	89.16	264.64
	1.8049	-86.48	143		9.74	90.394	270.74
	2.3786	95.865	149.93		1.1152	13.494	239.98
	3.1224	-6.4567	134.59		1.4002	25.034	267.01
	4.3053	148.93	179.64		1.8049	32.549	208.21
	5.7043	232.92	188.5		2.3786	28.419	205.96
	7.3322	267.59	232.89		3.1224	41.113	218.82
	8.747	410.77	273.48		4.3053	23.934	238.4
	9.74	462.49	245.29		5.7043	73.487	233.02
	1.1152	96.299	156.76		7.3322	165.36	211.36
	1.4002	46.285	144.88		8.747	143.18	198.24
	1.8049	98.089	148.57		9.74	323.71	245.22
	2.3786	108.26	145.59		1.1152	-17.573	220.01
	3.1224	86.142	148.03		1.4002	3.245	207.31
	4.3053	111.1	146.93		1.8049	-3.6567	267.6
	5.7043	254.07	187.13		2.3786	9.7017	246.41
	7.3322	545.91	202.17		3.1224	8.9022	218.27
	8.747	737.94	232.79		4.3053	-14.313	231.48
	9.74	1059.4	236.88		5.7043	26.558	271.36
	1.1152	44.477	194.42		7.3322	24.966	211.09
	1.4002	96.023	179.72		8.747	69.606	205.32
	1.8049	84.625	193.41		9.74	46.879	212.34
	2.3786	37.201	192.58		1.1152	-16.029	220.26
	3.1224	75.279	180.85		1.4002	45.857	215.42
	4.3053	72.383	193.38		1.8049	11.57	190.5
	5.7043	145.86	192.4		2.3786	58.898	207.29
	7.3322	228.15	263.07		3.1224	24.766	193.11
	8.747	266.16	250.89		4.3053	-18.835	210.6
	9.74	300	226.96		5.7043	60.15	208.35
	1.1152	58.708	243.25		7.3322	59.75	224.9
	1.4002	100.74	225.11		8.747	68.23	240.06
	1.8049	95.328	189.37		9.74	64.967	222.86
	2.3786	112.66	185.08		1.1152	-25.551	190.72
	3.1224	120.9	209.27		1.4002	-21.601	180.08
	4.3053	53.032	213.96		1.8049	-50.715	167.16
	5.7043	203.38	248.3		2.3786	-76.768	179.55
	7.3322	457.82	285.28		3.1224	-53.615	171.27
	8.747	516.6	301.39		4.3053	-65.108	182.76
	9.74	919.61	321.33		5.7043	38.541	178.79
	1.1152	16.382	182.31		7.3322	91.526	185.95
	1.4002	91.669	182.38		8.747	144	182.28
	1.8049	37.47	180.9		9.74	171.65	201.86
	2.3786	-41.958	171.1		1.1152	-7.0696	188.63
	3.1224	33.993	167.34		1.4002	-19.787	170.45
	4.3053	7.706	188.53		1.8049	-69.757	148.6
	5.7043	19.533	215.93		2.3786	-27.331	145.83
	7.3322	81.063	222.01		3.1224	-54.888	140.57
	8.747	41.758	238		4.3053	-38.722	159.98
	9.74	167.2	247.41		5.7043	-6.9393	163.47
	1.1152	25.43	199.18		7.3322	24.926	142.85
	1.4002	3.7314	172.85		8.747	51.964	138.68
	1.8049	-7.3109	124.63		9.74	61.411	138.23
	2.3786	0.1014	111.02		1.1152	58.319	173.59
	4.3053	29.889	158.56		1.4002	14.3	158.26
	5.7043	26.612	191		1.8049	21.19	148.68
	7.3322	24.707	142.71		2.3786	25.342	141.41
	8.747	12.068	114.8		3.1224	40.583	137.01
	9.74	28.775	194.55		4.3053	19.753	156.18
	1.1152	-4.6749	196.56		5.7043	55.081	152.68
	1.4002	5.1556	152.74		7.3322	67.356	147.58
	1.8049	-5.4338	157.76		8.747	86.929	135.6
	2.3786	-17.402	133.98		9.74	150.68	152.7
	3.1224	6.9425	133.31		1.1152	25.697	149.84
	4.3053	-8.0868	162.6		1.4002	10.876	129.45
	5.7043	22.365	136.54		1.8049	12.163	134.12
	7.3322	13.761	132.83		2.3786	9.2083	121.04
	8.747	5.441	126.89		3.1224	14.9	112.92
	9.74	10.562	143.72		4.3053	36.161	138.78
	1.1152	23.392	195.79		5.7043	46.954	129.68
	1.4002	19.857	153.46		7.3322	92.595	119.1
	1.8049	14.871	164.26		8.747	120.94	128.63
	2.3786	9.6263	151		9.74	139.56	125.89
	3.1224	10.408	133.97		1.1152	-9.3805	124.66
	4.3053	16.587	186.16		1.4002	12.151	115.45
	5.7043	37.309	164.2		1.8049	-1.3358	110.7
	7.3322	40.18	165.02		2.3786	-9.3273	111.79
	8.747	51.893	158.52		3.1224	11.865	105.12
	9.74	63.548	149.97		4.3053	-16.101	121.6
	1.1152	18.794	197.13		5.7043	21.066	105.47
	1.4002	3.117	179.87		7.3322	65.474	107.37
	1.8049	-0.68992	194.61		8.747	95.962	109.24
	2.3786	0.40134	190.76		9.74	96.238	119.62
	3.1224	3.1987	193.44		1.1152	-10.421	288.07
	4.3053	1.1436	193.36		1.4002	24.152	272.18
	5.7043	13.728	184.9		1.8049	21.11	279.6
	7.3322	29.501	173.94		2.3786	17.733	224.14
	8.747	35.314	189.34		3.1224	33.117	262.95
	9.74	44.432	199.01		4.3053	2.533	243.29
					5.7043	128.25	266.78
					7.3322	126.3	247.02
					8.747	288.97	312.47
					9.74	184.23	301.76
					1.1152	86.625	314.08
					1.4002	58.531	256.52
					1.8049	95.666	246.15
					2.3786	72.318	228.26
					3.1224	74.615	223.32
					4.3053	94.179	280.64
					5.7043	112.36	238.96
					7.3322	153.89	239.33
					8.747	157.12	207.59
					9.74	163.91	237.18
					1.1152	-10.781	86.9
					1.4002	-29.448	84.273
					1.8049	-19.796	72.788
					2.3786	-18.437	70.136
					3.1224	-17.972	69.366
					4.3053	-2.7749	84.306
					5.7043	-5.9746	73.357
					7.3322	59.915	71.804
					8.747	72.354	74.138
					9.74	100.32	72.423
					1.1152	-32.281	121.87
					1.4002	-38.971	113.88
					1.8049	-43.636	108.24
					2.3786	-43.535	104.83
					3.1224	-47.024	106.11
					4.3053	-25.034	116.93
					5.7043	-8.0867	106.05
					7.3322	19.512	109.12
					8.747	9.2697	119.81
					9.74	66.61	128.09
					1.1152	40.455	212.42
					1.4002	28.566	211.49
					1.8049	16.111	184.32
					2.3786	33.225	166.45
					3.1224	29.098	158.1
					4.3053	23.351	230.31
					5.7043	66.499	187.88
					7.3322	93.44	176.62
					8.747	103.94	164.98
					9.74	144.7	176.16
					1.1152	6.7513	120.43
					1.4002	16.666	109.74
					1.8049	8.8801	120.79
					2.3786	15.862	112.61
					3.1224	11.679	96.445
					4.3053	20.702	119.85
					5.7043	49.936	107.86
					7.3322	69.584	103.38
					8.747	125.8	107.83
					9.74	118.4	96.042
					1.1152	-10.831	124.84
					1.4002	2.6633	99.94
					1.8049	1.8424	128.79
					2.3786	-1.272	111.56
					3.1224	22.924	104.52
					4.3053	8.5613	115.4
					5.7043	11.059	103.49
					7.3322	34.129	110.52
					8.747	32.659	95.343
					9.74	50.006	96.374
					1.1152	-14.624	352.44
					1.4002	-23.058	406.2
					1.8049	-2.1725	406.88
					2.3786	-21.901	402.75
					3.1224	-2.4739	415.12
					4.3053	-15.886	417.3
					5.7043	14.355	398.62
					7.3322	67.823	408.24
					8.747	99.656	397.08
					9.74	118.31	363.26
					1.4002	32.406	95.995
					1.8049	67.681	117.24
					2.3786	38.932	108.72
					3.1224	34.112	123.94
					4.3053	51.034	98.362
					5.7043	30.184	115.25
					7.3322	67.058	125.01
					8.747	45.381	131.77
					9.74	100.41	142.49
					1.1152	98.993	151.15
					1.4002	93.612	152.97
					1.8049	102.02	148.12
					2.3786	129.34	144.65
					3.1224	126.64	144.83
					4.3053	79.919	158.64
					5.7043	140.58	144.79
					7.3322	140.54	147.96
					8.747	170.76	137.39
					9.74	188.52	145.3
					1.1152	61.36	109.23
					1.4002	-12.42	114.75
					1.8049	16.553	112.72
					2.3786	18.009	106.65
					3.1224	37.774	107.82
					4.3053	39.187	106.29
					5.7043	82.996	105.1
					7.3322	151.59	107.98
					8.747	187.96	103.11
					9.74	261.91	115.8

## Sheet: DAG no B2m
	These are all the single cell DAG measurements comprising Figure 4–figure supplement 3 (bottom row).
	DAG data set 1				DAG data set 2
	LOV2 half-life (sec)	CAR occupancy	DAG level (raw TIRF561)		LOV2 half-life (sec)	CAR occupancy	DAG level (raw TIRF561)
	1.1152	-94.273	330.84		1.1152	136.23	662.95
	1.4002	78.031	440.42		1.4002	145.89	870.2
	1.8049	-144.82	265.77		1.8049	188.86	606.97
	2.3786	113.24	262.91		2.3786	411.76	471.76
	3.1224	191.19	308.19		3.1224	406.72	719.79
	4.3053	-117.08	242.3		4.3053	194.87	564.05
	5.7043	454.43	1018.4		5.7043	325.38	1176.4
	7.3322	296.5	572.88		7.3322	475.5	1410.5
	8.747	506.36	666.36		8.747	628.98	1563.6
	9.74	500.81	802.52		9.74	735.6	1332.7
	1.4002	235.09	988.01		1.1152	65.11	293.56
	1.8049	183.85	531.53		1.4002	-41.06	251.03
	2.3786	299.7	528.08		1.8049	72.61	270.36
	3.1224	643.22	776.44		2.3786	152.92	317.85
	4.3053	215.75	642.42		3.1224	192.95	420.96
	5.7043	1452.7	1224.6		4.3053	19.409	318.63
	7.3322	1827.8	934.31		5.7043	372.84	1775.9
	8.747	2117	1033.2		7.3322	740.57	2137.9
	9.74	2751.7	1223.1		8.747	660.42	2030.9
	1.1152	205.51	1088.1		9.74	787.74	1598.5
	1.4002	202.12	1295.4		1.1152	91.665	335.55
	1.8049	555.14	826.99		1.4002	9.9144	439.95
	2.3786	757.4	1093.8		1.8049	61.137	308.84
	3.1224	1239.3	1512.6		2.3786	182.18	397.1
	4.3053	287.29	987.62		3.1224	118.01	363.13
	5.7043	1322.1	2401.8		4.3053	65.836	338.69
	7.3322	2012.8	2203.7		5.7043	215.18	1152.5
	8.747	2892.9	2436		7.3322	295.73	1521.6
	9.74	3533.9	2736.2		8.747	494.23	1368.1
	1.1152	710.78	811.03		9.74	449.11	1250.5
	1.4002	672.85	1150.2		1.1152	338.21	289.34
	1.8049	779.25	1003.1		1.4002	151.79	235.61
	2.3786	967.1	1138.4		1.8049	476.59	228.18
	3.1224	1303.2	2055.5		2.3786	789.6	241.05
	4.3053	798.56	986.48		3.1224	888.87	302.86
	5.7043	1486.4	2464.9		4.3053	247.05	260.91
	7.3322	2357.1	2648.6		5.7043	1217.3	647.36
	8.747	3343.4	4420		7.3322	2228.6	775.44
	9.74	4282.8	5053.5		8.747	3032.7	868.21
	1.1152	-99.422	205.22		9.74	3633.1	905.31
	1.4002	-262.12	429.5		1.1152	325.32	136.76
	1.8049	-51.775	318.32		1.4002	527.1	241.22
	2.3786	-63.505	365.09		1.8049	419.99	151.7
	3.1224	270.03	540.29		2.3786	377.68	142.48
	4.3053	250.85	268.74		3.1224	312.97	182.29
	5.7043	419.56	1403.7		4.3053	316.05	192.49
	7.3322	444.36	920.18		5.7043	452.81	667.58
	8.747	693.01	1201.9		7.3322	804.43	868.18
	9.74	609.14	1312.4		8.747	888.99	661.07
	1.1152	510.76	208.29		9.74	1001.7	877.84
	1.4002	46.877	205.33		1.1152	551.31	494.38
	1.8049	273	177.31		1.4002	110.21	436.57
	2.3786	421.46	254.43		1.8049	204.95	425.42
	3.1224	707.3	324.08		2.3786	95.867	588.04
	4.3053	508.73	236.86		3.1224	263.47	630.05
	5.7043	1229.5	1274.8		4.3053	334.3	725.35
	7.3322	1436.3	1043		5.7043	1031	916.17
	8.747	1688	1223.8		7.3322	1503.4	1005.6
	9.74	1804.2	1724.8		8.747	1859.3	874.7
	1.1152	-9.5174	301.97		9.74	1807.5	1063.3
	1.4002	-422.25	289.09		1.1152	1706.6	812.3
	1.8049	-105.99	213.03		1.4002	422.4	235.36
	2.3786	103.1	332.78		1.8049	1901.5	1447.2
	3.1224	489.26	362.89		2.3786	2502.2	1887.2
	4.3053	269.91	375.12		3.1224	3361.8	1970.1
	5.7043	863.75	955.47		4.3053	781.63	893.21
	7.3322	892.47	1028.4		5.7043	1868.4	1356.3
	8.747	973.82	869.14		7.3322	2981.3	2127.9
	9.74	1771.6	1230.7		8.747	4157.2	2347.4
	1.1152	585.26	313.98		9.74	5065.4	2700.4
	1.4002	227.2	249.09		1.1152	42.742	803.16
	1.8049	262.82	250.23		1.4002	-164.16	1080.1
	2.3786	267.05	235.55		1.8049	-119.93	935.12
	3.1224	391.22	333.63		2.3786	-345.14	1366.4
	4.3053	690.68	239.37		3.1224	-162.45	1568.4
	5.7043	1125.9	790.5		4.3053	-157.97	1361.5
	7.3322	1398.2	837.29		5.7043	393.22	1687.8
	8.747	2016.3	690.31		7.3322	657.74	1954
	9.74	1889.2	717.77		8.747	817.63	2910.7
	1.1152	617.36	411.98		9.74	970.63	2912
	1.4002	353.61	555.09		1.1152	497.44	353.98
	1.8049	530.85	361.35		1.4002	266.89	274.19
	2.3786	590.82	527.03		1.8049	182.46	391.31
	3.1224	519.1	711.91		2.3786	232.24	475.22
	4.3053	468.27	406.56		3.1224	315.13	610.38
	5.7043	892.75	1047.9		4.3053	285.42	406.04
	7.3322	1499.1	1314		5.7043	530.43	1105.2
	8.747	2157.2	1475.4		7.3322	667.35	1337.6
	9.74	2718.5	1976.4		8.747	995.18	1289.3
	1.1152	2779.6	993.5		9.74	1549.8	1239.3
	1.4002	1539.3	648.75		1.1152	2762.7	1197.1
	1.8049	2699.8	1201.1		1.4002	1707.9	1443.3
	2.3786	2040.4	1198.1		1.8049	2411	623.55
	3.1224	3205.2	1711.7		2.3786	1961.1	950.66
	4.3053	1983.9	787.41		3.1224	1666	720.23
	5.7043	2794.6	2483.8		4.3053	1632.1	1008.3
	7.3322	3084	2643.7		5.7043	2010.9	1289.9
	8.747	3932.5	3056.8		7.3322	2284.4	1241.3
	9.74	3949.7	4469.9		8.747	3051.2	1743.1
	1.1152	1928.7	653.79		9.74	3145.9	1472.7
	1.4002	1348.2	877.98		1.1152	81.638	100.41
	1.8049	1423.5	1123.7		1.4002	53.385	186.83
	2.3786	1446.2	1082.8		1.8049	-86.011	212.3
	3.1224	2089.2	1164.7		2.3786	-89.587	138.34
	4.3053	1648.7	1177.5		3.1224	105.53	386.91
	5.7043	2468.4	1742.4		4.3053	27.64	486.86
	7.3322	2160.2	1679.4		5.7043	279.31	658.11
	8.747	4167.8	2729.3		7.3322	354.38	616.91
	9.74	4216.6	3771.8		8.747	399.01	857.86
	1.1152	1061	488.58		9.74	290.28	654.8
	1.4002	678.42	851.14		1.1152	535.27	1712.2
	1.8049	769.82	673.1		1.4002	304.41	1423.1
	2.3786	731.3	453.87		1.8049	396.52	810.36
	3.1224	972.3	296.23		2.3786	504	901.14
	4.3053	806.67	661.12		3.1224	525.15	1214.6
	5.7043	1099.3	1235.6		4.3053	420.74	1349.4
	7.3322	1270.5	895.73		5.7043	839.52	2359.2
	8.747	1611.5	858.2		7.3322	1372.8	3093.7
	9.74	1972.7	1425.3		8.747	1984.5	3777.6
	1.1152	-256.02	434.2		9.74	2916.1	4188.9
	1.4002	-728.36	282.3		1.1152	1827.5	617.02
	1.8049	-511.23	943.3		1.4002	769.54	714.27
	2.3786	-271.72	1271.9		1.8049	677.44	952.62
	3.1224	-62.226	1562.5		2.3786	717.98	774.98
	4.3053	-458.72	327.32		3.1224	762.5	1155.2
	5.7043	-1.9217	1441.9		4.3053	1136.4	749.71
	7.3322	-90.875	2178.3		5.7043	1209.1	2172.1
	8.747	-121.97	1595.7		7.3322	1576.6	1365.5
	9.74	66.211	1779.1		8.747	1946.5	2058.3
	1.1152	240.41	562.19		9.74	2550.8	2417.2
	1.4002	365.49	1142.5		1.1152	1274.1	677.42
	1.8049	100.4	467.21		1.4002	639.43	1010.1
	2.3786	88.326	628.19		1.8049	471.28	721.89
	3.1224	202.22	755.51		2.3786	718.22	633.07
	4.3053	262.53	464.64		3.1224	739.02	1018.5
	5.7043	472.25	1284.1		4.3053	946.22	917.01
	7.3322	736.62	2099.7		5.7043	1342.5	1289.4
	8.747	1011.9	1815.1		7.3322	2151	1481.6
	9.74	923.05	1634		8.747	2126.7	2355.3
	1.1152	2491.2	838.24		9.74	3122.1	1874.3
	1.4002	2580.6	1967.8		1.1152	25.745	167.77
	1.8049	3642.8	1509.8		1.4002	8.9604	163.23
	2.3786	3900.6	1164.9		1.8049	105.29	144.63
	3.1224	3802.6	1011.8		2.3786	137.28	139.48
	4.3053	2469.4	1451.5		3.1224	53.457	108.61
	5.7043	3661.6	3016.6		4.3053	73.678	156.02
	7.3322	4987.8	2440		5.7043	431.65	597.84
	8.747	6101.9	2631		7.3322	673.92	576.42
	9.74	6196.3	2809.9		8.747	768.9	673.11
	1.1152	513.16	337.56		9.74	1137.4	548.33
	1.4002	224.58	402.13		1.1152	658.74	346.78
	1.8049	385.68	373.43		1.4002	421.99	405.1
	2.3786	515.07	363.98		1.8049	541.26	364.95
	3.1224	777.65	539.46		2.3786	646.72	309.15
	4.3053	564.09	322.48		3.1224	752.5	429.72
	5.7043	655.24	1607.5		4.3053	564.64	556.63
	7.3322	685.89	1100.3		5.7043	805.84	585.95
	8.747	1369.1	1027		7.3322	1584.8	1032.2
	9.74	1922.7	1378.6		8.747	2042.5	1053.7
	1.1152	46.957	288.31		9.74	2359.3	1103.8
	1.4002	91.422	354.32		1.1152	511.47	333.74
	1.8049	69.951	204.75		1.4002	317.6	185.1
	2.3786	171.57	247.59		1.8049	422.76	167.66
	3.1224	156.58	256.79		2.3786	498.01	143.09
	4.3053	-74.752	221.15		3.1224	377.15	264.92
	5.7043	460.37	690.08		4.3053	413.69	118.91
	7.3322	734.5	996.75		5.7043	782.27	627.12
	8.747	989.46	1068.6		7.3322	1077	671.16
	9.74	1364.8	1042.7		8.747	1694.7	719.85
	1.1152	529.1	285.21		9.74	2012.6	889.89
	1.4002	164.34	262.75		1.1152	925.71	733.21
	1.8049	197.64	253.32		1.4002	289.45	350.75
	2.3786	137.07	222.53		1.8049	448.15	300.82
	3.1224	289.74	314.95		2.3786	576.58	425.58
	4.3053	329.42	255.29		3.1224	641.54	325.25
	5.7043	775.33	701.59		4.3053	358.48	406.04
	7.3322	1381.3	774.89		5.7043	1143.3	796.89
	8.747	1293.4	672.05		7.3322	1475.2	773.6
	9.74	1692.1	803.99		8.747	1890.2	968.31
	1.1152	204.59	272.65		9.74	2346.9	980.18
	1.4002	132.01	499.21		1.1152	614.35	1638.9
	1.8049	178.21	525.71		1.4002	437.26	1906.7
	2.3786	205.96	380.52		1.8049	739.59	1409.2
	3.1224	151.45	424.08		2.3786	678.55	1242.3
	4.3053	93.107	552.12		3.1224	686.87	1614.9
	5.7043	475.09	1500.5		4.3053	641.8	1799.7
	7.3322	546.61	1408.7		5.7043	1183	3737.5
	8.747	1040.8	1413.6		7.3322	1489.2	4200.5
	9.74	997.42	1761.9		8.747	1691.9	4542.5
	1.1152	103.25	201.47		9.74	2103.8	4865
	1.4002	133.43	344.31		1.1152	90.142	238.07
	1.8049	226.62	198.06		1.4002	79.095	220.15
	2.3786	157.27	264.17		1.8049	47.301	363.04
	3.1224	394.85	346.35		2.3786	196.23	294.79
	4.3053	122.34	209.62		3.1224	94.035	423.82
	5.7043	939.59	646.02		4.3053	262.77	238.2
	7.3322	1328	692.33		5.7043	359.53	1382
	8.747	1619.6	955.21		7.3322	747.98	1682.3
	9.74	1608.7	1303.9		8.747	1049.3	1085.7
	1.1152	98.705	177.44		9.74	1195.6	994.56
	1.4002	164.06	2141.2		1.1152	149.66	321.35
	1.8049	806.71	1308.5		1.4002	-2.0201	653.91
	2.3786	1275.5	1054		1.8049	35.015	313.48
	3.1224	1536.8	1151.6		2.3786	-150.99	326.86
	4.3053	110.96	205.98		3.1224	80.439	320.07
	5.7043	1289.2	3162		4.3053	69.081	637.09
	7.3322	2179.1	1864.8		5.7043	386.76	1448.2
	8.747	2653.7	2555.5		7.3322	690.85	1111.6
	9.74	3450.8	3756.5		8.747	582.31	1158
	1.1152	336.22	255.19		9.74	734.41	1456
	1.4002	213.93	193.17		1.1152	21.445	91.393
	1.8049	844.17	254.67		1.4002	-52.027	89.946
	2.3786	709.5	249.3		1.8049	243.48	740.98
	3.1224	794.29	286.2		2.3786	440.73	1025.9
	4.3053	426.32	255.76		3.1224	906.42	934.47
	5.7043	1455.1	1692.2		4.3053	57.346	132.73
	7.3322	1689.1	1596		5.7043	836.24	1544.2
	8.747	1855.1	2604		7.3322	1194.8	1264.6
	9.74	2856.9	2765.5		8.747	1801	1759.1
	1.1152	41.73	231.94		9.74	2012.5	1574.6
	1.4002	-146.05	287.47		1.1152	132.91	202.07
	1.8049	55.086	219.78		1.4002	11.368	212.26
	2.3786	-16.133	257.55		1.8049	52.742	201.63
	3.1224	175.4	337.15		2.3786	27.092	185.19
	4.3053	1.7266	320.26		3.1224	125.57	317.21
	5.7043	532.64	1006.6		4.3053	123.79	158.54
	7.3322	621.39	752.37		5.7043	522.15	671.08
	8.747	1078.1	1133		7.3322	589.04	622.13
	9.74	1229	1316.4		8.747	802.45	577.58
	1.1152	1961.2	600.54		9.74	1220	629.19
	1.4002	539.25	1045.9		1.1152	771.27	201.9
	1.8049	553.74	714.18		1.4002	320.85	177.48
	2.3786	490.82	1152.1		1.8049	246.1	187.03
	3.1224	752.31	1549		2.3786	218.83	155.48
	4.3053	533.1	666.96		3.1224	311.15	206.71
	5.7043	784.63	1790.8		4.3053	491.51	189.56
	7.3322	964.54	1393		5.7043	627.25	375.73
	8.747	1814.2	1836		7.3322	1295.8	343.39
	9.74	2224.6	2248.3		8.747	1228.6	417.28
	1.1152	90.375	275.67		9.74	1524.9	384.28
	1.4002	4.4029	365.57		1.1152	59.623	169.26
	1.8049	109.28	313.4		1.4002	-20.887	129.32
	2.3786	262.92	380.96		1.8049	-108.16	153.92
	3.1224	369.05	398.8		2.3786	20.793	140.57
	4.3053	25.577	488.53		3.1224	25.168	144.61
	5.7043	660.88	841.89		4.3053	28.044	141.46
	7.3322	1021.4	731.12		5.7043	81.415	306.3
	8.747	1595.6	746.39		7.3322	180.13	936.58
	9.74	2029.3	781.22		8.747	172.53	799.17
	1.1152	276.96	141.3		9.74	173.23	1135.6
	1.4002	248.18	99.834		1.1152	3511.5	311.37
	1.8049	272.38	76.031		1.4002	3951.9	440.5
	2.3786	305.08	104.42		1.8049	2691	317.14
	3.1224	196.44	106.2		2.3786	2869.1	290.82
	4.3053	425.76	59.194		3.1224	2190.5	526.26
	5.7043	323.56	565.2		4.3053	4859.4	472.53
	7.3322	473.23	697.81		5.7043	2172.4	1224.2
	8.747	710.55	824.26		7.3322	2705.6	1495.3
	9.74	937.96	615.32		8.747	3073.8	1310
	1.1152	-77.598	226.67		9.74	3423.9	1459.1
	1.4002	-57.256	234.69		1.1152	192.42	474.73
	1.8049	-51.266	230.83		1.4002	134.66	445.32
	2.3786	97.713	198.94		1.8049	168.42	353.36
	3.1224	-9.2124	211.43		2.3786	200.05	434.53
	4.3053	-56.788	298.76		3.1224	207.17	419.85
	5.7043	-32.528	1086.6		4.3053	161.38	463.95
	7.3322	53.589	984.64		5.7043	314.56	791.25
	8.747	96.286	1072.2		7.3322	444.59	913.12
	9.74	76.078	714.4		8.747	637.82	1015.1
	1.1152	232.65	427.05		9.74	852.32	1099.5
	1.4002	69.331	211.96		1.1152	-43.452	307.44
	1.8049	53.747	162.62		1.4002	-81.393	169.02
	2.3786	86.569	180.06		1.8049	-53.741	187.44
	3.1224	56.391	347.87		2.3786	-5.6894	132.37
	4.3053	60.963	378.7		3.1224	3.3066	184.78
	5.7043	263.03	920.94		4.3053	-42.546	287.39
	7.3322	364.64	913.04		5.7043	72.342	972.72
	8.747	552.11	1086.1		7.3322	86.866	873.15
	9.74	896.68	1025.3		8.747	129.1	998.75
	1.1152	539.14	760.78		9.74	162.4	1099.2
	1.4002	301.26	929		1.1152	156.24	218.53
	1.8049	369.66	201.42		1.4002	118.13	401.37
	2.3786	378.99	261.02		1.8049	219.52	543.39
	3.1224	474.25	216.61		2.3786	220.64	662.3
	4.3053	230.97	617.73		3.1224	232.71	872.82
	5.7043	622.08	772.61		4.3053	142.9	333.12
	7.3322	805.49	1073.9		5.7043	535.21	1040.5
	8.747	1292.9	1249.8		7.3322	744.36	978.9
	9.74	1712.6	1523.2		8.747	1129.3	1312.1
	2.3786	-41.646	152.57		9.74	1503	1296.7
	3.1224	-54.035	511.61		1.1152	116.71	257.62
	7.3322	-12.383	967.22		1.4002	125.42	358.61
	8.747	-29.496	1488.1		1.8049	170.05	242.98
	9.74	72.583	1414.6		2.3786	97.628	192.62
	1.1152	249.81	322.2		3.1224	174.33	256.22
	1.4002	211.34	298.62		4.3053	124.89	273.67
	1.8049	375.23	273.93		5.7043	245.3	923.72
	2.3786	184.69	269.71		7.3322	393.72	822.82
	3.1224	280.93	341.65		8.747	498.5	778.61
	4.3053	158.75	345.66		9.74	775.75	806.76
	5.7043	515.46	935.66		1.1152	154.61	381.34
	7.3322	556.28	884.42		1.4002	125.99	501.44
	8.747	966.89	1358		1.8049	188.92	123.06
	9.74	1238	1418.7		2.3786	199.54	232.69
	1.1152	144.03	162.68		3.1224	201.29	200.16
	1.4002	114.48	140.23		4.3053	149.05	175.06
	1.8049	124.07	115		5.7043	486.47	685.31
	2.3786	61.157	106.57		7.3322	761.34	580.19
	3.1224	76.76	123.57		8.747	1193	689.07
	4.3053	110.39	95.995		9.74	1127.5	1084
	5.7043	193.94	432.34		1.1152	32.143	85.163
	7.3322	375.95	407.74		1.4002	9.2874	135.24
	8.747	342.1	488.65		1.8049	132.54	86.996
	9.74	509.02	444.45		2.3786	96.27	88.831
	1.1152	359.34	510.33		3.1224	45.764	77.207
	1.4002	305.14	718.49		4.3053	37.616	110.21
	1.8049	326.29	607.16		5.7043	134.05	332.37
	2.3786	300.04	661.87		7.3322	206.38	422.48
	3.1224	430.93	1037.2		8.747	301.35	344.08
	4.3053	273.23	489.03		9.74	332.49	409.06
	5.7043	695.86	989.53		1.1152	35.323	535.76
	7.3322	1052.4	1415.7		1.4002	-24.251	257.84
	8.747	1458.5	1583.6		1.8049	-5.2456	230.75
	9.74	2199.6	1606.6		2.3786	37.975	268.68
	1.1152	46.218	200.57		3.1224	13.711	241.17
	1.4002	23.174	432.4		4.3053	52.423	321.01
	1.8049	-115.79	175.11		5.7043	290.07	732.86
	2.3786	-8.3427	140.95		7.3322	402.26	743.94
	3.1224	-18.743	174.26		8.747	799.31	896.63
	4.3053	55.075	186		9.74	919.15	735.76
	5.7043	209.57	752.56		1.1152	155.56	93.021
	7.3322	268.49	755.87		1.4002	158.38	61.365
	8.747	451.31	704.47		1.8049	145.96	69.69
	9.74	566.12	879.66		2.3786	150.76	72.967
	1.1152	54.548	224.58		3.1224	241.66	94.345
	1.4002	52.222	158.38		4.3053	92.323	61.734
	1.8049	149.45	181.48		5.7043	348.87	117.93
	2.3786	251.85	225.45		7.3322	538.29	349.04
	3.1224	311.43	261.19		8.747	886.01	1241.4
	4.3053	44.564	154.4		9.74	943.3	1082.9
	5.7043	397.11	917.37		1.1152	63.477	143.12
	7.3322	557	841.23		1.4002	56.786	101.84
	8.747	812.9	866.18		1.8049	33.918	108.74
	9.74	1365.7	989.83		2.3786	76.863	106.19
	1.1152	481.49	340.23		3.1224	60.568	108.66
	1.4002	361.83	591.99		4.3053	17.202	116.87
	1.8049	413.41	825.94		5.7043	88.113	923.46
	2.3786	434.11	414.68		7.3322	89.506	866.06
	3.1224	516.22	451.06		8.747	106.16	794.72
	4.3053	506.33	253.86		9.74	98.906	782.43
	5.7043	641.88	970.87		1.1152	509.33	1648.9
	7.3322	933.5	1008.8		1.4002	278.96	1284.7
	8.747	1605.9	1453.8		1.8049	320.2	1051
	9.74	2281.5	1549.4		2.3786	386.97	1440.8
	1.1152	446.71	107.34		3.1224	365.94	1914.6
	1.4002	178.77	84.814		4.3053	366.73	1046.9
	1.8049	230.94	47.352		5.7043	644.51	1889.7
	2.3786	220.19	61.509		7.3322	828.28	1907.4
	3.1224	214.04	78.08		8.747	987.01	2357.3
	4.3053	223.8	116.75		9.74	1279.5	2245.8
	5.7043	495.55	358.33		1.1152	871.85	1205.6
	7.3322	673.97	225.13		1.4002	343.59	1507
	8.747	1208.2	304.51		1.8049	249.5	351.66
	9.74	1745.5	282.61		2.3786	389.18	691.91
	1.1152	107.65	391.28		3.1224	629.65	551.58
	1.4002	91.242	361.18		4.3053	478.17	1497.3
	1.8049	46.426	425.61		5.7043	479.13	1296.9
	2.3786	89.557	348.48		7.3322	617.96	1864.3
	3.1224	96.112	227.3		8.747	825.33	2134.4
	4.3053	91.622	488.91		9.74	1077.6	2255.5
	5.7043	186.75	818.31		1.1152	992.48	1459.8
	7.3322	372.86	829.98		1.4002	750.7	1567.3
	8.747	524.81	960.48		1.8049	470.78	1193.5
	9.74	602.43	803.33		2.3786	731.25	1592.4
	1.1152	85.298	503.24		3.1224	773.76	1802.8
	1.4002	85.589	318.5		4.3053	1017.4	1622.8
	1.8049	94.527	369.49		5.7043	1083.2	1733.9
	2.3786	103.44	261.44		7.3322	997.51	1890
	3.1224	219.09	641.58		8.747	1140	2075.2
	4.3053	105.9	358.66		9.74	2740.9	2230.1
	5.7043	479.99	1497.5		1.1152	236.55	896.61
	7.3322	746.91	1772.6		1.4002	222.52	1222.5
	8.747	1372.5	1516.5		1.8049	276.03	810.3
	9.74	1871.3	2078.5		2.3786	340.87	785.68
	1.1152	18.936	211.93		3.1224	362.11	916.13
	1.4002	38.799	107.71		4.3053	216.64	1545.2
	1.8049	-20.853	163.02		5.7043	430.18	1455.5
	2.3786	-21.867	156.69		7.3322	673.46	1613.5
	3.1224	-55.19	198.83		8.747	959.57	1961.3
	4.3053	35.417	227.39		9.74	1152.4	1796.6
	5.7043	71.98	1045.9		1.1152	336.19	983.4
	7.3322	198.66	1137.8		1.4002	250	577.53
	8.747	229.34	888.99		1.8049	373.29	771.77
	9.74	272.59	891.72		2.3786	543.24	965.45
	1.1152	79.77	302.56		3.1224	613.03	769.47
	1.4002	90.638	170.95		4.3053	293.29	651.68
	1.8049	116.36	158.35		5.7043	722.67	979.69
	2.3786	99.902	148.65		7.3322	1092	1331
	3.1224	147.03	182.06		8.747	1723.6	1717.4
	4.3053	75.46	228.43		9.74	2269.1	1604.4
	5.7043	193.24	612.79		1.1152	77.789	423.24
	7.3322	279.87	638.06		1.4002	43.64	461.15
	8.747	417.64	786.46		1.8049	69.218	455.36
	9.74	691.16	642.63		2.3786	170.93	731.78
	1.1152	672.04	586.74		3.1224	221.02	525.68
	1.4002	186.13	381.43		4.3053	57.582	489.52
	1.8049	491.63	658.67		5.7043	330.71	1109.1
	2.3786	404.22	511.59		7.3322	484.51	1538.6
	3.1224	334.99	347.44		8.747	701.36	1525.1
	4.3053	436.02	475.17		9.74	1160.6	1826.4
	5.7043	405.76	1028		1.1152	-19.671	82.966
	7.3322	611.29	802.65		1.4002	-0.17661	107.11
	8.747	782.08	1018.4		1.8049	-30.312	52.182
	9.74	1184.6	916.57		2.3786	35.385	44.589
	1.1152	61.972	83.236		3.1224	1.0024	101.06
	1.4002	10.863	86.515		4.3053	-45.446	98.588
	1.8049	8.9431	62.433		5.7043	72.877	315.35
	2.3786	-21.179	83.433		7.3322	113.04	374.88
	3.1224	-70.145	63.79		8.747	195.66	346.92
	4.3053	53.216	223.6		9.74	310.95	398.58
	5.7043	16.906	312.58		1.1152	5.5463	260.27
	7.3322	66.397	816.71		1.4002	-34.262	100.74
	8.747	16.735	584.67		1.8049	18.082	93.124
	9.74	147.02	697.15		2.3786	-8.8576	58.892
	1.1152	70.408	112.81		3.1224	-46.762	96.326
	1.4002	68.353	101.76		4.3053	18.324	70.857
	1.8049	86.102	98.058		5.7043	34.407	549.04
	2.3786	56.525	127		7.3322	30.725	524.95
	3.1224	95.41	116.57		8.747	91.495	420.06
	4.3053	84.478	118.85		9.74	152.88	349.3
	5.7043	127.93	480		1.1152	13.635	84.669
	7.3322	190.77	327.31		1.4002	-16.462	94.342
	8.747	282.59	448.55		1.8049	-11.422	72.516
	9.74	350.69	431.98		2.3786	-11.851	76.232
	1.1152	109.77	402.01		3.1224	19.966	68.744
	1.4002	84.882	184.19		4.3053	-9.3512	92.923
	1.8049	123.09	185.92		5.7043	15.946	403.97
	2.3786	128.61	173.64		7.3322	36.479	408.88
	3.1224	140.52	155.82		8.747	27.731	279.64
	4.3053	85.605	345.46		9.74	69.361	289.7
	5.7043	242.5	625.97		1.1152	72.428	406.07
	7.3322	660.36	1064.1		1.4002	40.18	123.71
	8.747	681.54	903.56		1.8049	74.45	113.14
	9.74	1369.3	1249.2		2.3786	54.641	108.01
	1.1152	57.144	290.28		3.1224	64.016	98.439
	1.4002	38.657	302.83		4.3053	92.922	153.54
	1.8049	94.9	273.86		5.7043	95.999	722.52
	2.3786	137.4	310.27		7.3322	146.25	935.15
	3.1224	261.13	401.45		8.747	259.61	1068.4
	4.3053	31.859	331.98		9.74	383.1	1048.4
	5.7043	143.09	767.05		1.1152	189.89	211.12
	7.3322	181.51	1099.5		1.4002	87.622	166.56
	8.747	253.22	1393.2		1.8049	135.99	166.73
	9.74	329.44	1431		2.3786	316.81	171.77
	1.1152	69.9	243.11		3.1224	146.95	161.53
	1.4002	36.873	184.9		4.3053	274.88	200.2
	1.8049	33.605	170.31		5.7043	306.05	432.23
	2.3786	85.907	176.43		7.3322	514.18	564.21
	3.1224	77.533	173.85		8.747	946.18	531.08
	4.3053	56.101	197.6		9.74	935.92	515.07
	5.7043	131.27	330.18		1.1152	-38.907	52.542
	7.3322	179.22	410.72		1.4002	-46.618	46.813
	8.747	249.1	570.63		1.8049	51.062	51.25
	9.74	215.08	629.35		2.3786	102.71	67.231
	1.1152	2.1166	309.21		3.1224	166.8	74.799
	1.4002	14.825	181.06		4.3053	-34.872	44.569
	1.8049	-37.977	140.74		5.7043	357.46	473.7
	2.3786	5.5847	191.4		7.3322	705.6	537.94
	3.1224	6.2883	151.52		8.747	1107.2	586.69
	4.3053	-19.958	179.87		9.74	1367.9	616.99
	5.7043	99.054	627.86		1.1152	30.728	87.947
	7.3322	81.139	1105.1		1.4002	1.0604	121.33
	8.747	208.41	666.25		1.8049	42.556	63.514
	9.74	410.53	676.95		2.3786	43.236	138.14
	1.1152	121.85	345.49		3.1224	54.127	104.53
	1.4002	70.764	182.44		4.3053	-29.064	78.845
	1.8049	83.074	149.93		5.7043	98.979	282.01
	2.3786	43.76	145.69		7.3322	111.42	237.86
	3.1224	50.603	221.67		8.747	30.093	298.07
	4.3053	72.118	203.27		9.74	51.184	264.4
	5.7043	217.39	425.3		1.1152	30.841	236.42
	7.3322	249.85	1012.8		1.4002	21.949	351.16
	8.747	351.49	836.04		1.8049	62.3	352.96
	9.74	521.49	937.72		2.3786	62.921	276.36
	1.1152	-16.31	84.397		3.1224	88.434	344.65
	1.4002	53.881	65.586		4.3053	20.009	273.9
	2.3786	44.13	127.61		5.7043	157.95	696.25
	3.1224	93.509	341.07		7.3322	198.7	1240.9
	4.3053	9.1495	73.12		8.747	350.53	1900.5
	5.7043	95.276	139.48		9.74	343.55	1456.6
	7.3322	390.54	1001.8		1.1152	6.5494	949.9
	8.747	614.6	995.88		1.4002	-40.849	710.91
	9.74	1144.2	1328.3		1.8049	-28.174	685.76
	1.1152	106.81	308.46		2.3786	18.641	537.7
	1.4002	249.1	176.1		3.1224	62.856	772.42
	1.8049	146.36	172.53		4.3053	-3.6414	804.73
	2.3786	87.317	214.5		5.7043	102.72	1361.8
	3.1224	262.7	292.45		7.3322	174.1	1107.1
	4.3053	236.07	202.3		8.747	337.38	1753.9
	5.7043	300.4	1270.9		9.74	509.47	1732.2
	7.3322	470.62	1835.3		1.1152	-10.376	313.66
	8.747	1050.3	2393.9		1.4002	-20.538	214.5
	9.74	1016.2	2492.2		1.8049	-16.624	182.02
	1.1152	-15.068	86.526		2.3786	-19.095	210.26
	1.4002	1.7967	38.316		3.1224	-10.752	217.15
	1.8049	27.536	51.214		4.3053	7.812	233.27
	2.3786	26.378	65.848		5.7043	-14.356	541.81
	3.1224	49.41	288.37		7.3322	8.261	459.47
	5.7043	123.95	865.69		8.747	16.751	703.44
	7.3322	196.87	749.79		9.74	11.837	1016
	8.747	299.61	807.63		1.1152	111.13	398.48
	9.74	737.79	782.75		1.4002	55.489	270.74
	1.1152	265.5	255.83		1.8049	166.31	229.25
	1.4002	68.247	148.7		2.3786	164.82	197.82
	1.8049	82.57	133.94		3.1224	217.37	238.34
	2.3786	80.986	132.61		4.3053	30.482	380.9
	3.1224	130.27	138.99		5.7043	186.29	276.89
	4.3053	114.14	412.28		7.3322	143.74	623.74
	5.7043	240.22	493.98		8.747	154.43	1476.6
	7.3322	335.41	782.73		9.74	134.33	1510.8
	8.747	476.5	997.48		1.1152	83.558	194.12
	9.74	796.29	1346.1		1.4002	11.099	161.72
	1.1152	26.823	231.51		1.8049	42.32	204.07
	1.4002	40.698	289.35		2.3786	47.385	99.55
	1.8049	58.626	151.28		3.1224	43.015	112.81
	2.3786	22.851	203.02		4.3053	23.118	304.59
	3.1224	50.516	227.26		5.7043	105.38	854.53
	4.3053	9.9377	222.3		7.3322	221.63	579.91
	5.7043	103.29	492.51		8.747	365.98	1083.6
	7.3322	192.18	656.16		9.74	510.21	1185.4
	8.747	300.61	676.77		1.1152	4.0128	178
	9.74	406.77	908.34		1.4002	6.5483	117.13
	1.1152	60.163	96.752		1.8049	-27.36	135.21
	1.4002	31.543	84.274		2.3786	0.97732	138.06
	1.8049	61.702	76.093		3.1224	4.1417	142.73
	2.3786	22.679	93.138		4.3053	2.8548	114.5
	3.1224	37.668	121.38		5.7043	-21.933	181.71
	4.3053	54.209	81.081		7.3322	-11.155	640.09
	5.7043	162.2	438.49		8.747	31.93	965.41
	7.3322	169.9	506.57		9.74	10.181	609.13
	8.747	405.17	461.45		1.1152	-45.204	202.14
	9.74	603.62	558.59		1.4002	-21.257	147.62
	1.1152	208.65	322.87		1.8049	-96.015	137.38
	1.4002	129.24	209.28		2.3786	-91.521	145.56
	1.8049	133.43	261.17		3.1224	-68.979	162.65
	2.3786	116.43	205.89		4.3053	-72.739	149.57
	3.1224	208.9	152.95		5.7043	-67.936	1227.8
	4.3053	121.92	261.99		7.3322	-52.532	481.81
	5.7043	203.91	632.66		8.747	-58.886	572.8
	7.3322	345.63	613.3		9.74	-51.153	354.54
	8.747	476.56	676.64		1.1152	157.2	726.83
	9.74	711.69	953.06		1.4002	127.46	732.55
	1.1152	107.43	211.76		1.8049	126.73	525.73
	1.4002	81.331	220.8		2.3786	152.74	239.77
	1.8049	74.84	154.3		3.1224	88.279	275.12
	2.3786	83.418	219.8		4.3053	88.233	1247.8
	3.1224	81.689	118.7		5.7043	182.01	1897.7
	4.3053	53.064	180.05		7.3322	221.76	2000.3
	5.7043	123.46	628.47		8.747	329.6	1840
	7.3322	245.12	992.49		9.74	393.63	1912.4
	8.747	297.62	954.52		1.1152	47.755	873.69
	9.74	593.28	1238.3		1.4002	54.028	570.29
	1.1152	24.907	63.043		1.8049	37.495	317.05
	1.4002	-21.226	170.23		2.3786	34.916	231.44
	1.8049	16.344	104.14		3.1224	42.792	638.28
	2.3786	-5.4492	110.32		4.3053	49.414	488.23
	3.1224	31.019	138.44		5.7043	109.93	1260.1
	4.3053	4.3989	112.95		7.3322	169.94	1587.8
	5.7043	37.599	866.83		8.747	333.85	1413.8
	7.3322	27.916	707.81		9.74	477.02	1391.9
	8.747	181.65	833.89		1.1152	32.512	1204.7
	9.74	238.47	860.3		1.4002	38.192	297.46
	1.1152	19.627	126.1		1.8049	26.391	140.74
	1.4002	32.013	56.897		2.3786	-3.6867	124.71
	1.8049	65.121	114.84		3.1224	19.576	274.94
	2.3786	5.802	62.971		4.3053	34.211	588.25
	3.1224	38.78	62.699		5.7043	100.83	1527.4
	4.3053	3.1357	57.14		7.3322	101.06	1994.2
	5.7043	106.04	430.51		8.747	147.2	2007.9
	7.3322	87.809	447.16		9.74	221.23	2479.3
	8.747	205.36	573.44		1.1152	148.35	1374
	9.74	384.69	616.06		1.4002	107.07	447.01
	1.1152	228.5	530.6		1.8049	70.547	304.14
	1.4002	169.5	403.46		2.3786	80.829	154.71
	1.8049	210.16	323.21		3.1224	113.96	361.94
	2.3786	186.42	443.98		4.3053	118.37	586
	3.1224	217.62	366.49		5.7043	144.16	1149.3
	4.3053	190.93	528.83		7.3322	194.48	917.97
	5.7043	369	541.84		8.747	257.5	2023.8
	7.3322	408.64	780.49		9.74	263.3	1921.9
	8.747	723.23	858.86		1.1152	22.12	140.74
	9.74	962.52	1154.6		1.4002	0.85944	209.93
	1.1152	41.126	124.46		1.8049	-4.9116	98.896
	1.4002	40.35	91.823		2.3786	-9.7886	80.285
	1.8049	63.422	92.741		3.1224	-2.2725	93.741
	2.3786	-3.3898	104.05		4.3053	-32.918	189.91
	3.1224	32.138	149.06		5.7043	72.32	451.21
	4.3053	5.6334	91.53		7.3322	21.181	402.65
	5.7043	56.179	551.92		8.747	74.918	730.14
	7.3322	101.48	617.94		9.74	143.68	888.53
	8.747	162.73	800.03		1.1152	166.66	2128.3
	9.74	261.28	811.94		1.4002	112.74	1147.1
	1.1152	258.31	344.72		1.8049	91.441	676.32
	1.4002	101.08	271.11		2.3786	117.14	633.3
	1.8049	129.66	154.92		3.1224	60.522	407.3
	2.3786	208.62	251.14		4.3053	76.931	1145.4
	3.1224	237.55	254.02		5.7043	130.9	891.81
	4.3053	91.78	225.85		7.3322	155.88	1643.6
	5.7043	225.06	841.72		8.747	375.69	2041.1
	7.3322	282.07	805.21		9.74	493.95	2218.6
	8.747	492.05	1064.7		1.1152	-19.096	180.58
	9.74	471.47	942.51		1.4002	67.058	90.771
	1.8049	-1.654	342.45		1.8049	35.809	76.222
	2.3786	7.5016	235.62		2.3786	53.871	58.312
	3.1224	1.7918	418.31		3.1224	79.566	64.432
	5.7043	11.526	337.3		4.3053	33.949	111.87
	7.3322	30.878	562.79		5.7043	59.676	444.74
	8.747	99.139	1090.2		7.3322	330.4	487.51
	9.74	260.37	1996.5		8.747	534.19	867.78
	1.1152	9.0604	351.63		9.74	421.86	889.89
	4.3053	14.71	209.19		1.1152	174.66	1028.7
	5.7043	18.38	167.04		1.4002	101.52	368.34
	7.3322	11.049	98.69		1.8049	72.941	168.7
	9.74	111.81	616.47		2.3786	46.608	192.6
	1.1152	6.5073	265.78		3.1224	87.211	221.26
	1.4002	6.3051	191.38		4.3053	122.81	1357.5
	1.8049	0.48092	188.61		5.7043	129.74	606.87
	2.3786	-9.7086	186.19		7.3322	134.43	1974.8
	3.1224	-5.1498	156.49		8.747	197.16	1659.4
	4.3053	0.77964	180.59		9.74	245.91	2025.6
	5.7043	5.8189	221.26		1.1152	24.354	228.07
	7.3322	12.836	1168.7		1.4002	14.523	151.64
	8.747	37.498	1683.7		1.8049	9.2516	157.53
	9.74	71.698	2767.4		2.3786	17.603	132.07
	1.1152	35.937	1210.8		3.1224	5.4574	171.93
	1.4002	30.231	566.35		4.3053	14.733	166.59
	1.8049	32.694	555.8		5.7043	52.87	424.19
	2.3786	28.447	661.87		7.3322	46.884	438.3
	3.1224	32.096	394.94		8.747	74.66	678.53
	4.3053	30.567	577.43		9.74	118.05	992.11
	5.7043	55.635	1691.6		1.1152	28.286	96.769
	7.3322	83.785	2788.4		1.4002	-5.2062	115.61
	8.747	160.16	2479.3		1.8049	5.1456	137.92
	9.74	397.49	2713.5		2.3786	44.422	100.18
	1.1152	25.06	522.52		3.1224	79.812	124.36
	1.4002	-0.44292	392.74		5.7043	85.941	1091.3
	1.8049	4.8146	303.98		7.3322	149.88	1285.9
	2.3786	10.634	484.88		8.747	267.29	1137.2
	3.1224	-19.988	409.16		9.74	551.09	1476.8
	4.3053	-11.159	453.88		1.1152	7.9829	231.44
	5.7043	22.47	603.05		1.4002	78.11	196.3
	7.3322	35.606	2394.8		1.8049	75.719	295.83
	8.747	50.222	3055.7		2.3786	33.645	131.39
	9.74	102	2660.6		3.1224	24.453	61.84
	1.1152	67.361	766.24		4.3053	107.24	297.62
	1.4002	20.91	347.49		5.7043	27.211	405.94
	2.3786	41.93	346.68		7.3322	131.1	513.4
	3.1224	21.902	464.41		8.747	149.38	942.51
	4.3053	81.233	401.62		9.74	267.42	994.01
	5.7043	62.286	612.81		1.1152	15.545	570.58
	7.3322	42.323	1056.4		1.4002	-9.2481	241.57
	8.747	240.61	3455.5		1.8049	26.116	117.26
	9.74	332.12	3787.5		2.3786	17.659	113.41
	1.1152	8.7559	322.12		3.1224	85.816	148.58
	1.4002	9.5135	219.6		4.3053	45.364	200.58
	1.8049	3.9709	288.71		5.7043	73.656	178.62
	2.3786	2.3064	265.21		7.3322	166.08	996.6
	3.1224	8.8954	299.65		8.747	196.18	1730.3
	4.3053	4.7652	246.61		9.74	234.61	1386
	5.7043	5.6731	337.69		1.1152	51.905	173.11
	7.3322	25.821	1077.5		1.4002	43.97	94.715
	8.747	41.195	1255.1		1.8049	-12.36	101.71
	9.74	101.92	1554.7		2.3786	7.9119	115.02
	1.1152	20.614	217.24		3.1224	46.895	105.4
	1.4002	5.6348	854.58		4.3053	38.783	150.57
	1.8049	-4.3842	333.2		5.7043	44.482	313.43
	2.3786	-8.2872	268.34		7.3322	41.144	389.15
	3.1224	37.83	226.92		8.747	69.938	982.45
	4.3053	42.009	306.37		9.74	96.928	911.56
	5.7043	60.422	763.72		1.1152	72.909	433.08
	7.3322	66.08	720.65		1.4002	62.476	157.01
	8.747	192.37	1607.2		1.8049	49.126	186.89
	9.74	407.74	1539.2		2.3786	56.337	295.12
	1.1152	14.17	584.12		3.1224	8.5765	146.15
	1.4002	31.317	326.18		4.3053	22.507	194.13
	1.8049	13.004	384.24		5.7043	240.23	385.58
	2.3786	12.017	267.91		7.3322	277.03	948.4
	3.1224	12.053	257.09		8.747	171.05	1472.4
	4.3053	15.967	320.38		9.74	316.3	1843.7
	5.7043	38.918	567.65		1.1152	18.981	267.94
	7.3322	33.246	1382.6		1.4002	1.2604	337.94
	8.747	119.56	1600.5		1.8049	86.139	108.51
	9.74	218.23	2160.3		2.3786	15.736	67.808
	1.1152	1.3484	311.58		3.1224	17.374	81.618
	1.4002	5.6469	547.48		4.3053	59.514	105.03
	1.8049	-0.92854	284.5		5.7043	44.023	440.55
	2.3786	-2.5691	167.85		7.3322	114.4	352.87
	3.1224	5.5985	195		8.747	109.37	803.38
	4.3053	9.1776	242.65		9.74	154.68	504.94
	5.7043	5.2872	1392.6		1.1152	61.692	266.71
	7.3322	7.0611	717.99		1.4002	10.495	144.53
	8.747	16.767	1512.9		1.8049	38.88	111.51
	9.74	30.355	1824.4		2.3786	75.462	113.91
	1.1152	18.285	178.34		3.1224	36.375	165.17
	1.4002	30.58	118.07		4.3053	1.7729	180.23
	1.8049	13.035	132.98		5.7043	126.87	284.24
	2.3786	20.392	118.15		7.3322	135.27	789.13
	3.1224	27.993	112.32		8.747	117	853.37
	4.3053	35.603	158.12		9.74	290.66	1059.2
	5.7043	64.502	220.51		1.1152	101.6	128.86
	7.3322	58.003	364.91		1.4002	88.935	125.81
	8.747	58.067	552.97		1.8049	70.791	136.7
	9.74	133.32	840.12		2.3786	52.859	96.348
	1.1152	42.321	857.21		3.1224	43.626	92.202
	1.4002	1.0945	802.13		4.3053	91.248	121.51
	1.8049	9.7351	678.79		5.7043	147.57	260.37
	2.3786	19.655	768.51		7.3322	112.66	576.83
	3.1224	18.117	724.38		8.747	63.68	537.33
	4.3053	9.942	1109.6		9.74	138.93	674.21
	5.7043	40.259	2218.1		1.1152	47.512	247.83
	7.3322	47.296	1960.7		1.4002	47.366	198.99
	8.747	116.96	3078		1.8049	13.743	82.326
	9.74	107.96	2677.8		2.3786	2.4156	61.787
					3.1224	-25.704	63.83
					4.3053	29.708	210.34
					5.7043	47.741	495.71
					7.3322	-12.983	500.13
					8.747	47.138	461.81
					9.74	26.633	414.96
					1.1152	67.11	691.11
					1.4002	61.233	344.46
					1.8049	40.533	296.63
					2.3786	47.745	285.86
					3.1224	31.013	381.74
					4.3053	35.617	500.31
					5.7043	77.054	449.47
					7.3322	68.468	488.91
					8.747	87.729	1531.4
					9.74	177.92	2476.9
					1.1152	40.417	364.6
					1.4002	19.554	244.09
					1.8049	37.718	148.24
					2.3786	33.361	106.51
					3.1224	-13.105	141.23
					4.3053	25.178	215.07
					5.7043	108.08	516.2
					7.3322	97.865	342.52
					8.747	148.42	515.92
					9.74	174.6	651.64
